# Supplementary material for: Isolation of small extracellular vesicles from small volumes of blood plasma using size exclusion chromatography and density gradient ultracentrifugation
Source: eLife. 2026 May 22;13:RP92796. doi: 10.7554/eLife.92796 (PMC13197162; doi:10.7554/eLife.92796)
Supplement: Figure 1—figure supplement 1—source data 1. [file elife-92796-fig1-figsupp1-data1.xlsx]

## Sheet: ReadMe
Source data for Figure 1–figure supplement 1.
This file contains numerical data corresponding to panels A, D, E, and F in Figure 1–figure supplement 1.
Panel A includes SEC elution profiles showing particle concentrations measured by nanoparticle tracking analysis (NTA) and protein concentrations measured by BCA assay across SEC fractions.
Panels D and E show representative particle size distributions measured by NTA for plasma and SEC-PF samples, respectively.
Panel F shows a histogram of particle diameters derived from TEM images.
Sheet descriptions:
Fig1-supp1A_NTA,BCA profiles: SEC elution profiles showing particle concentrations measured by nanoparticle tracking analysis (NTA) and protein concentrations measured by BCA assay across SEC fractions.
Fig1-supp1D-plasma-NTA: Particle size distribution of plasma measured by NTA
Fig1-supp1E-SEC-PF-NTA: Particle size distribution of SEC-PF measured by NTA
FIG1-supp1F-TEM-histogram: Particle diameter distribution derived from TEM images

## Sheet: Fig1-supp1A-NTA, BCA profiles
Particle concentration (NTA measurement) data
	Control 1	control 2	control 3	control 4	control 5	control 6	control 7	control 8	control 9	control 10
fraction	Particle concentration (ml-1)
6	—	—	3800000000	86000000	—	9800000000	—	320000000	200000000	260000000
7	120000000000	180000000000	3400000000	660000000	45000000000	240000000000	30000000000	5100000000	27000000000	30000000000
8	680000000000	180000000000	11000000000	740000000	310000000000	420000000000	30000000000	8700000000	43000000000	36000000000
9	880000000000	52000000000	3200000000	1100000000	260000000000	98000000000	32000000000	2200000000	11000000000	18000000000
10	710000000000	23000000000	1800000000	1000000000	50000000000	38000000000	11000000000	3000000000	5000000000	8200000000
11	360000000000	16000000000	2100000000	1300000000	20000000000	35000000000	60000000000	2700000000	5400000000	5700000000
12	33000000000	14000000000	1500000000	1400000000	40000000000	37000000000	2000000000	2200000000	2800000000	3900000000
13	20000000000	10000000000	1500000000	1600000000	46000000000	19000000000	1700000000	2500000000	2300000000	2700000000
14	16000000000	10000000000	1800000000	2700000000	12000000000	25000000000	3500000000	3900000000	3100000000	2600000000
15	15000000000	5600000000	1700000000	3300000000	23000000000	23000000000	2300000000	2300000000	5000000000	2500000000
Protein concentration (BCA measurement) data
	Control 1	control 2	control 3	control 4	control 5	control 6	control 7	control 8	control 9	control 10
6	—	0	—	0	—	0	—	0	0	0
7	0	0	0	0	0	0	0	0	0	0
8	0.01647	0	0	0	0	0	0.00809	0	0	0
9	0.02806	0.02912	0	0	0.00848	0.01664	0.014	0	0	0
10	0.05982	0.08987	0.01393	0	0.05855	0.08957	0.04199	0.06821	0.04542	0
11	0.13757	0.23549	0.11	0.01348	0.17069	0.22667	0.12822	0.20138	0.18832	0.01348
12	0.34967	0.40644	0.25497	0.12861	0.32804	0.44772	0.2956	0.39606	0.4008	0.12861
13	—	0.63844	—	0.36104	—	0.69348	—	0.64218	0.68907	0.36104
14	—	1.01616	—	0.75762	—	1.03515	—	1.038	1.09452	0.75762
15	—	1.56443	—	1.50561	—	1.61252	—	1.86412	1.86193	1.50561
fraction	Average concentration	Standard Error
7	800000000	200000000
8	23000000000	3000000000
9	18000000000	6000000000
10	4700000000	400000000
11	2800000000	200000000
12	2400000000	400000000
13	2300000000	400000000
14	2200000000	300000000
15	2000000000	400000000

## Sheet: Fig1-supp1D-plasma-NTA
Size(nm)	Fraction			Values reconstructed from plotted curves due to unavailability of original files.
30	0.000799976
35	0.00322031
40	0.00694174
45	0.00899573
50	0.0199239
55	0.0341359
60	0.0526028
65	0.0670912
70	0.0780479
75	0.0807102
80	0.0793351
85	0.0715047
90	0.059409
95	0.0501305
100	0.0414198
105	0.0319551
110	0.0277785
115	0.0255558
120	0.0226774
125	0.0202601
130	0.0192733
135	0.0173889
140	0.0159985
145	0.0144303
150	0.0126473
155	0.010494
160	0.00790907
165	0.00684884
170	0.00704579
175	0.00707972
180	0.00703032
185	0.00535677
190	0.00342827
195	0.00161922
200	0.00147034
205	0.000993281
210	0.000775442
215	0.000746542
220	0.000835388
225	0.000983242
230	0.00108121
235	0.00108244
240	0.00106739
245	0.000970974
250	0.000805948
255	0.000647473
260	0.000488333
265	0.00032589
270	0.000237023
275	0.000230588
280	0.00023096
285	0.00028191
290	0.000490692
295	0.000785756
300	0.00120657
305	0.00150566
310	0.00158757
315	0.00140219
320	0.000960686
325	0.000570937
330	0.00033879
335	0.000225814
340	0.000205723
345	0.000228057
350	0.000231188
355	0.00023149
360	0.000229569
365	0.000290629
370	0.000447125
375	0.000631061
380	0.000762029
385	0.000752218
390	0.000651173
395	0.000483535
400	0.000319671
405	0.000232183
410	0.000231597
415	0.000231037
420	0.000231322
425	0.000231223
430	0.000231251
435	0.00023125
440	0.000231222
445	0.000231336
450	0.000230936
455	0.000232175
460	0.000255149
465	0.000405733
470	0.000579634
475	0.000733452
480	0.000751272
485	0.00068233
490	0.000517973
495	0.000348227
500	0.000235057

## Sheet: Fig1-supp1E-SEC-PF-NTA
Size(nm)	Fraction			Values reconstructed from plotted curves due to unavailability of original files.
25	0.00247
30	0.00364
35	0.00515
40	0.00793
45	0.01176
50	0.01644
55	0.02175
60	0.04267
65	0.0601
70	0.07977
75	0.0786
80	0.0769
85	0.0747
90	0.0723
95	0.0712
100	0.0478
105	0.04376
110	0.03965
115	0.03554
120	0.03149
125	0.02758
130	0.02387
135	0.02041
140	0.01729
145	0.01466
150	0.01093
155	0.00856
160	0.00725
165	0.0072
170	0.00715
175	0.00633
180	0.00569
185	0.00518
190	0.00478
195	0.0038
200	0.0033
205	0.0024
210	0.002
215	0.00185
220	0.00176
225	0.00234
230	0.00234
235	0.00234
240	0.0021
245	0.00191
250	0.00188
255	0.00184
260	0.00181
265	0.0018
270	0.00169
275	0.00158
280	0.00149
285	0.00141
290	0.00134
295	0.00127
300	0.00122
305	0.00117
310	0.00112
315	0.00108
320	0.00104
325	0.00101
330	0.00098
335	0.00095
340	0.00093
345	0.00091
350	0.0009
355	0.00088
360	0.00086
365	0.00085
370	0.00083
375	0.00082
380	0.0008
385	0.00078
390	0.00077
395	0.00076
400	0.00074
405	0.00074
410	0.00073
415	0.00073
420	0.00073
425	0.00073
430	0.00074
435	0.00074
440	0.00074
445	0.00074
450	0.00073
455	0.00072
460	0.00071
465	0.0007
470	0.00069
475	0.00068
480	0.00067
485	0.00066
490	0.00066
495	0.00066
500	0.00066

## Sheet: Fig1-supp1F-TEM-histogram
Size(nm)	Number of events			Values reconstructed from plotted curves due to unavailability of original files.
5	44
10	191
15	245
20	425
25	216
30	106
35	113
40	98
45	109
50	65
55	36
60	23
65	17
70	9
75	4
80	5
85	6
90	0
95	0
100	0
