# Supplementary material for: Isolation of small extracellular vesicles from small volumes of blood plasma using size exclusion chromatography and density gradient ultracentrifugation
Source: eLife. 2026 May 22;13:RP92796. doi: 10.7554/eLife.92796 (PMC13197162; doi:10.7554/eLife.92796)
Supplement: Figure 2—figure supplement 1—source data 1. [file elife-92796-fig2-figsupp1-data1.xlsx]

## Sheet: ReadMe
Source data for Figure 2–figure supplement 1.
This file contains numerical data corresponding to panel B in Figure 2–figure supplement 1.
The data describe the distribution of small extracellular vesicles (sEVs) and lipoproteins across a density gradient following density gradient ultracentrifugation (DGUC). After centrifugation, the gradient was fractionated into 42 fractions, and each fraction was characterized by density and particle concentration.
Based on density ranges, fractions were classified into three zones:
- LP zone: density < 1.05 g/mL (lipoprotein-dominated)
- LP+sEV zone: density 1.05–1.08 g/mL (mixed population)
- sEV zone: density > 1.08 g/mL (sEV-enriched)
Sheet descriptions:
- Fig2-supp1B_density: Density values (g/mL) for each fraction across the gradient
- Fig2-supp1B_NTA_profile: Particle concentration (particles/mL) measured by NTA for each fraction

## Sheet: Fig2-supp1B-Density
Fractions	Density (g/ml)			Values reconstructed from plotted curves due to unavailability of original files.
fraction 1	1.20084
fraction 2	1.20084
fraction 3	1.20084
fraction 4	1.20084
fraction 5	1.20084
fraction 6	1.18744
fraction 7	1.17173
fraction 8	1.16763
fraction 9	1.16927
fraction 10	1.16927
fraction 11	1.15379
fraction 12	1.15217
fraction 13	1.12819
fraction 14	1.09468
fraction 15	1.07943
fraction 16	1.07114
fraction 17	1.07039
fraction 18	1.06889
fraction 19	1.06739
fraction 20	1.05993
fraction 21	1.04884
fraction 22	1.03859
fraction 23	1.03351
fraction 24	1.02845
fraction 25	1.02701
fraction 26	1.02701
fraction 27	1.02773
fraction 28	1.02773
fraction 29	1.02845
fraction 30	1.02845
fraction 31	1.02917
fraction 32	1.02989
fraction 33	1.03206

## Sheet: Fig2-supp1B-NTA-Profile
Fractions	Vesicle concentration (10^10)			Values reconstructed from plotted curves due to unavailability of original files.
fraction 1	0.72819
fraction 2	1.52642
fraction 3	0.93194
fraction 4	0.868511
fraction 5	0.549283
fraction 6	0.477058
fraction 7	0.781371
fraction 8	0.899667
fraction 9	1.11152
fraction 10	1.82056
fraction 11	3.43332
fraction 12	3.43332
fraction 13	3.55648
fraction 14	4.24181
fraction 15	4.71487
fraction 16	5.24068
fraction 17	9.21055
fraction 18	20.717
fraction 19	24.7091
fraction 20	41.9227
fraction 21	41.9227
fraction 22	37.7164
fraction 23	37.7164
fraction 24	31.6228
fraction 25	40.4709
fraction 26	39.0694
fraction 27	35.1494
fraction 28	41.9227
fraction 29	39.0694
fraction 30	63.9915
fraction 31	68.6649
fraction 32	81.8965
fraction 33	97.6778
fraction 34	116.5
fraction 35	184.207
fraction 36	262.04
fraction 37	460.538
fraction 38	781.371
fraction 39	1953.51
fraction 40	2778.93
