# Supplementary material for: Isolation of small extracellular vesicles from small volumes of blood plasma using size exclusion chromatography and density gradient ultracentrifugation
Source: eLife. 2026 May 22;13:RP92796. doi: 10.7554/eLife.92796 (PMC13197162; doi:10.7554/eLife.92796)
Supplement: Figure 2—source data 1. [file elife-92796-fig2-data1.xlsx]

## Sheet: ReadMe
Source data for Figure 2.
This file contains numerical data corresponding to the density profiles shown in Figure 2B.
The data represent density values (g/mL) measured across gradient fractions under different centrifugation durations (2 h, 6 h, and 16 h).
Columns:
Fractions: Fraction number collected after density gradient ultracentrifugation
- Density (2 h): Density values for samples centrifuged for 2 hours
- Density (6 h): Density values for samples centrifuged for 6 hours
- Density (16 h): Density values for samples centrifuged for 16 hours

## Sheet: Figure 2
	16h		6h		2h
Fractions	Density	stdev	Density	stdev	Density	stdev
1	1.2025	0.0015	1.149	0.005	1.126	0.005
2	1.099	0.001	1.0875	0.0015	1.08	0.003
3	1.079	0.001	1.081	0.001	1.0765	0.0015
4	1.0645	0.0015	1.0735	0.0005	1.075	0.001
5	1.0535	0.0005	1.066	0.001	1.072	0.002
6	1.0475	0.0005	1.0565	0.0005	1.067	0.002
7	1.041	0.001	1.0485	0.0005	1.059	0.002
8	1.0375	0.0015	1.0425	0.0005	1.0495	0.0015
9	1.0345	0.0005	1.0375	0.0005	1.042	0.001
10	1.033	0.001	1.0345	0.0005	1.037	0.002
11	1.0325	0.0005	1.0335	0.0005	1.034	0.001
12	1.031	0.001	1.0325	0.0005	1.0325	0.0015
13	1.03	0.002	1.0305	0.0015	1.0315	0.0015
