# Supplementary material for: Isolation of small extracellular vesicles from small volumes of blood plasma using size exclusion chromatography and density gradient ultracentrifugation
Source: eLife. 2026 May 22;13:RP92796. doi: 10.7554/eLife.92796 (PMC13197162; doi:10.7554/eLife.92796)
Supplement: Figure 3—source data 1. [file elife-92796-fig3-data1.xlsx]

## Sheet: ReadMe
Source data for Figure 3.
This file contains numerical data corresponding to the partcle concentration and protein concentration distributions shown in Figure 3.
Sheet “Figure3B” contains data for Panel B.
Sheet “Figure3C” contains data for Panel C.

## Sheet: Figure 3B
Fraction	Particle Concentration (x10^11)	stdev
1	0.047	0.02
2	0.011	0.0035
3	0.007	0.0055
4	0.011	0.0035
5	0.015	0.002
6	0.033	0.0055
7	0.054	0.0165
8	0.123	0.0485
9	0.199	0.0795
10	0.344	0.152
11	0.58	0.0815
12	0.917	0.2535
13	1.802	0.3445

## Sheet: Figure 3C
Fraction	Protein concentration by BCA (mg/ml)	stdev
1	7.668	1.246
2	11.406	3.834
3	9.249	3.115
4	11.406	1.917
5	12.364	3.163
6	18.163	4.553
7	23.626	5.799
8	46.965	3.259
9	54.8245	4.2175
10	54.585	1.294
11	44.856	2.588
12	34.0735	4.0735
13	23.147	2.54
