# Supplementary material for: Isolation of small extracellular vesicles from small volumes of blood plasma using size exclusion chromatography and density gradient ultracentrifugation
Source: eLife. 2026 May 22;13:RP92796. doi: 10.7554/eLife.92796 (PMC13197162; doi:10.7554/eLife.92796)
Supplement: Figure 5—figure supplement 1—source data 1. [file elife-92796-fig5-figsupp1-data1.xlsx]

## Sheet: ReadMe
Source data for Figure 5–figure supplement 1.
This file contains numerical data corresponding to panel B in Figure 5–figure supplement 1.
The data represent particle size distributions derived from transmission electron microscopy (TEM) images for 13 fractions collected from the 1.5 mL tube following SEC-DGUC.
Each fraction (SEC-DGUC-1 to SEC-DGUC-13) was analyzed to determine the distribution of particle diameters, which were used to generate the histograms shown in the figure.
Sheet descriptions:
Fig5-supp1-TEM-distribution: Particle diameter distributions for all 13 fractions

## Sheet: Fig5-supp1-TEM-distribution
	Fraction 1	Fraction 2	Fraction 3	Fraction 4	Fraction 5	Fraction 6	Fraction 7	Fraction 8	Fraction 9	Fraction 10	Fraction 11	Fraction 12	Fraction 13		Values reconstructed from plotted curves due to unavailability of original files.
size (nm)	Number of events	Number of events	Number of events	Number of events	Number of events	Number of events	Number of events	Number of events	Number of events	Number of events	Number of events	Number of events	Number of events
5	1					37	10					3	5
10	0	3	5	17	23	95	25	20	60	11	4	11	12
15	2	41	8	34	62	429	46	32	249	125	23	162	88
20	41	119	50	125	363	440	439	700	1822	64	13	313	192
25	24	17	32	45	74	156	183	314	531	717	106	176	170
30	30	43	41	63	61	127	78	89	129	663	281	150	157
35	26	50	79	110	74	101	66	86	90	201	161	100	130
40	46	50	111	131	83	99	70	87	107	88	99	85	92
45	25	32	82	125	93	95	74	69	60	115	68	56	91
50	31	29	80	105	51	74	49	48	60	77	77	29	42
55	14	15	51	69	65	42	32	29	38	76	63	35	35
60	15	15	35	44	38	31	25	17	16	46	35	14	27
65	19	14	23	32	29	33	20	15	11	34	22	11	18
70	18	5	14	34	24	31	8	3		21	19	3	8
75	14	3	9	19	15	12	3	6		10	11	3	3
80	5	2	9	15	5	5	8			6	9	2	5
85	7	1	7	7	5	6	2			0	6	1	4
90	4	0	4	1	0	6				3	0	1	1
95	1	1	1	2	1	6					1	2	0
100	8	1	0	3	3						1		1
105	1		1	3
110	1		1	1
115	1		2	1
120	0		0	1
125	1		2	2
130	4			2
135	0			1
140	3			1
