# Supplementary material for: Isolation of small extracellular vesicles from small volumes of blood plasma using size exclusion chromatography and density gradient ultracentrifugation
Source: eLife. 2026 May 22;13:RP92796. doi: 10.7554/eLife.92796 (PMC13197162; doi:10.7554/eLife.92796)
Supplement: Figure 5—figure supplement 2—source data 1. [file elife-92796-fig5-figsupp2-data1.xlsx]

## Sheet: ReadMe
Source data for Figure 5–figure supplement 2.
This file contains numerical data corresponding to panels B, D, and E in Figure 5–figure supplement 2.
Panel B shows particle size distributions measured by nanoparticle tracking analysis (NTA) for 13 fractions collected from the 1.5 mL tube following the SEC-DGUC protocol.
Panel D shows particle size distributions of SEC-DGUC-1 obtained after 2 h and 16 h centrifugation, demonstrating similarity between the two conditions.
Panel E shows particle concentrations measured by NTA for four fractions along the tube under 2 h and 16 h centrifugation conditions.
Sheet descriptions:
Fig5-supp2B-NTA-distribution: Particle size distributions for 13 fractions (SEC-DGUC-1 to SEC-DGUC-13)
Fig5-supp2D-spintime-comparison: Particle size distributions of SEC-DGUC-1 for 2 h and 16 h centrifugation
Fig5-sup2E-spintime-NTA-profile: Particle concentration profiles for four fractions under 2 h and 16 h centrifugation

## Sheet: Fig5-supp2B-NTA-distribution
	f1		f2		f3		f4		f5		f6		f7		f8		f9		f10		f11		f12		f13			Values reconstructed from plotted curves due to unavailability of original files.
size(nm)	fraction	size(nm)	fraction	size(nm)	fraction	size(nm)	fraction	size(nm)	fraction	size(nm)	fraction	size(nm)	fraction	size(nm)	fraction	size(nm)	fraction	size(nm)	fraction	size(nm)	fraction	size(nm)	fraction	size(nm)	fraction
29.1646	0.000329633	17.25	0.000953785	17.2515	0.00110582	14.4296	0.00145675	17.4599	0.000971168	18.2209	0.00121396	18.9773	0.000971168	16.6989	0.000728376	20.4948	0.000971168	17.4553	0.00048558	15.1837	0.00097117	13.6663	0.000971168	17.4599	0.00097117
37.196	0.00194234	27.7601	0.00251555	28.1498	0.00262335	28.1028	0.0031563	34.9451	0.00461305	28.8569	0.00267071	33.4277	0.00461305	37.2443	0.00704097	35.6992	0.00412747	29.6202	0.0031563	31.9079	0.00437026	31.1492	0.00437026	32.6597	0.00364188
42.9301	0.00359358	39.1362	0.0134202	39.5988	0.0152959	37.2558	0.00825493	38.8101	0.0121396	37.2351	0.0060698	41.8588	0.0135964	40.3506	0.0145675	40.3022	0.00946889	36.4741	0.00582701	38.0353	0.0104401	40.3621	0.0157815	39.5642	0.011654
44.8224	0.0060698	43.5362	0.0265121	43.146	0.0263566	41.8957	0.017481	44.1972	0.0201517	44.1074	0.0106829	45.0204	0.0269499	42.6936	0.0216085	44.2018	0.0206373	39.5781	0.0131108	43.4523	0.0216085	43.5145	0.0281639	44.9835	0.0230652
46.8745	0.00962641	47.4025	0.0381184	51.5137	0.047938	45.7906	0.0281639	47.3426	0.0318058	44.1603	0.0162671	47.4048	0.0383612	47.3587	0.0335053	48.1313	0.0349621	43.4454	0.0208801	46.5908	0.0325341	48.2004	0.0422458	47.3841	0.036176
47.9286	0.0135964	51.5137	0.047938	54.5281	0.0694385	48.1612	0.0381184	48.1981	0.042003	46.5194	0.0250076	52.854	0.0529287	50.488	0.0434598	51.3066	0.0497724	45.839	0.0332625	51.3205	0.0512291	54.4037	0.0563278	51.2721	0.0461305
50.0579	0.0174007	54.3899	0.054871	55.9045	0.0600658	50.5088	0.0456449	52.9047	0.0582701	50.442	0.0386039	56.0133	0.0660395	53.6473	0.0565706	55.2338	0.0638543	49.727	0.043217	52.215	0.0655539	52.9784	0.0660395	55.1624	0.0563278
51.2577	0.0209457	55.9065	0.0602791	56.9056	0.0801214	52.0953	0.0529287	56.7881	0.067739	52.04	0.0471017	56.8871	0.0781791	52.983	0.066525	56.1146	0.0767223	51.3757	0.0570561	56.1353	0.0789074	55.3536	0.0764795	54.4912	0.0655539
52.4503	0.0237445	56.2509	0.0637975	60.0556	0.092261	50.67	0.0626404	59.9312	0.0791502	52.1368	0.0572989	59.283	0.0908042	56.8756	0.0769651	59.2738	0.0898331	55.2937	0.0701669	56.2781	0.0939606	57.0138	0.0915326	53.8016	0.0728376
55.3606	0.027302	57.9206	0.0677157	63.1665	0.100273	53.0106	0.0694385	61.5362	0.0883763	59.1633	0.0781791	63.1573	0.099302	57.7103	0.0849772	61.6421	0.0995448	57.6666	0.0803642	64.7875	0.111199	60.9133	0.102701	57.6942	0.0832777
58.9988	0.031111	59.3072	0.0727396	67.1121	0.116297	56.8986	0.079393	68.5167	0.104401	63.0813	0.0912898	64.8037	0.112898	60.8673	0.0978452	67.0292	0.107557	60.0602	0.0927466	84.9485	0.0769651	68.5604	0.109014	57.0345	0.0937178
60.8837	0.0346906	60.2006	0.0758631	71.3766	0.0859484	58.5197	0.0903187	77.4763	0.0891047	63.2102	0.104886	71.646	0.114355	64.7507	0.107314	73.0621	0.103672	63.201	0.103915	76.736	0.091047	75.3475	0.104643	59.412	0.104401
62.0127	0.0380958	61.1631	0.0817094	80.5489	0.076454	60.127	0.0997876	81.164	0.0779363	67.1282	0.117997	75.3337	0.103187	74.5612	0.10173	81.9895	0.0849772	68.5512	0.108042	73.0714	0.104643	78.2765	0.093475	66.3303	0.113869
63.6952	0.0412988	61.2655	0.0788484	81.1039	0.0734998	63.9966	0.1078	82.6032	0.0696813	78.9984	0.0895903	87.9373	0.0721093	79.741	0.0878907	84.9185	0.0738088	78.3341	0.0995448	89.365	0.0626404	84.222	0.0803642	68.641	0.117511
67.3547	0.044621	62.7151	0.0845703	88.4542	0.0466161	67.1144	0.11654	87.0957	0.0633687	84.2012	0.0781791	88.5418	0.0558422	84.9438	0.0764795	90.126	0.0628832	83.4586	0.0798786	95.2897	0.0473445	87.1901	0.0733232	73.0875	0.106343
74.8154	0.0457197	64.724	0.088302	88.5464	0.0563278	71.5884	0.108285	97.5935	0.050258	89.4087	0.0672534	94.4964	0.0437026	89.4041	0.0667678	95.315	0.0500152	90.8801	0.0623976	101.217	0.0322914	90.8778	0.0621548	77.5293	0.0946889
77.5648	0.048711	66.5636	0.090997	92.2248	0.0441882	75.3268	0.102458	106.489	0.0281639	101.971	0.0318058	98.2164	0.0359332	93.8114	0.0514719	98.221	0.0364188	97.5014	0.0405463	111.733	0.0211229	95.2874	0.0471017	81.217	0.0835205
85.2498	0.0510121	67.89	0.0942402	101.521	0.0335504	79.0283	0.0927466	115.529	0.0213657	113.97	0.0169954	116.966	0.012868	100.481	0.0347193	106.463	0.0254932	107.974	0.0247648	116.913	0.00728376	100.465	0.0330197	84.9485	0.0769651
92.4049	0.0477887	71.9971	0.0981428	103.421	0.0289377	84.2174	0.0798786	126.788	0.00849772	125.369	0.0189378	129.027	0.00461305	107.949	0.0220941	115.49	0.0172382	138.125	0.00388467	150.248	0.00218513	113.232	0.0191806	89.4294	0.0694385
96.7943	0.0451945	72.2326	0.10128	113.381	0.0217045	87.1878	0.0730804	144.185	0.00291351	130.634	0.0140819	138.874	0.00291351	126.004	0.00582701	127.533	0.00704097	185.152	0.00242792	183.623	0.00121396	125.266	0.00801214	91.5951	0.0577845
100.885	0.0421061	76.724	0.0966774	114.994	0.0195775	90.887	0.0631259	159.353	0.00218513	138.196	0.0114112	149.536	0.00704097	146.457	0.00242792	150.251	0.00242792					146.469	0.00364188	97.5451	0.0451593
104.314	0.0388467	77.8019	0.0886148	117.278	0.0144775	103.477	0.0305918	196.554	0.00461305	142.712	0.00752656	160.953	0.0109256	160.103	0.00121396	167.694	0.00169954					161.634	0.00267071	101.214	0.0320486
112.349	0.0372223	78.7802	0.084648	125.992	0.00461305	96.7242	0.0386039	184.398	0.00291351	152.621	0.0123824	170.748	0.00364188			191.206	0.000728376					183.618	0.000728376	112.464	0.0182094
118.001	0.0380136	79.4293	0.0813611	128.25	0.00267071	95.3242	0.0509863	219.292	0.00218513	167.736	0.0060698	176.043	0.00194234			211.691	0.000728376							120.739	0.0106829
118.751	0.0351704	80.4825	0.0776543	136.7	0.0135964	114.724	0.0165099			176.857	0.00776935	183.667	0.00582701											155.562	0.00242792
119.971	0.0320474	81.4699	0.0740328	153.339	0.00801214	134.334	0.00412747			182.147	0.00558422	196.524	0.00145675
121.302	0.0289688	83.6052	0.0708254	160.195	0.0109256	198.039	0.00121396			203.348	0.000971168
124.707	0.0259731	88.6223	0.0643399	167.002	0.00874052	216.246	0.000971168
128.457	0.024522	92.7958	0.0562222	184.428	0.0060698	120.713	0.00801214
131.405	0.0226783	95.0967	0.0529135
139.763	0.0239167	95.8452	0.049866
149.1	0.024382	97.347	0.0442685
151.237	0.0264643	97.7527	0.0460633
156.592	0.0310774	101.297	0.0333081
159.391	0.0284712	103.034	0.0291678
160.482	0.0205518	103.405	0.0272895
164.135	0.0140837	112.304	0.0228986
167.823	0.0152959	114.716	0.0195863
171.896	0.0133915	117.019	0.0144983
176.905	0.012868	121.384	0.0114753
180.636	0.0142457	128.513	0.0105593
187.625	0.0134913	131.286	0.00787253
190.555	0.0121396	134.588	0.00440901
191.765	0.0103105	141.666	0.00384236
197.203	0.00695206	146.487	0.00558422
204.922	0.00865522	150.224	0.00457738
207.981	0.00946889	158.767	0.00367274
212	0.00730746	167.304	0.00212354
216.123	0.00421552	175.86	0.00257586
221.471	0.00278506	184.408	0.00215746
233.402	0.00386497	192.97	0.00322042
237.527	0.00485584	201.516	0.00266632
240.784	0.00351584	210.057	0.00155814
245.038	0.00113723	218.604	0.000992735
253.749	0.00153371	227.158	0.0012189
254.966	0.00364188	240.372	0.000981427
262.145	0.00158201	245.037	0.00110582
269.91	0.0005668	293.232	0.000540415
282.242	0.00100907	301.987	0.00145675
286.824	0.00267071	306.834	0.000172904
291.36	0.000971168	378.746	0.000189866
337.642	0.000971168	408.934	0
		417.486	0
		419.949	7.51703e-05
		426.037	0
		434.589	0
		443.141	0
		451.692	0
		460.244	0
		473.591	3.15536e-05

## Sheet: Fig5-supp2D-spintime-comparison
	16h		2h			Values reconstructed from plotted curves due to unavailability of original files.
size (nm)	Fraction	size (nm)	Fraction
7.00841	0.000108256	29.2448	0.000272548
15.7382	0.000246486	36.8216	0.000825479
23.1562	0.00078542	42.5866	0.00232431
31.4684	0.000302826	47.2192	0.00327351
38.4358	0.00109351	51.3503	0.00468851
43.3278	0.00256299	53.7048	0.00599995
47.9604	0.00354979	55.5578	0.00694654
51.3671	0.00480236	56.6696	0.00794119
53.3342	0.00597317	57.8344	0.00909061
55.5578	0.00690572	60.2409	0.0107837
56.9476	0.00794873	64.2671	0.01365
58.1521	0.00916798	69.8467	0.015704
60.0051	0.0108015	71.3704	0.0171876
60.9272	0.0144923	72.9763	0.0186278
62.2572	0.0125697	74.0881	0.019641
63.5762	0.01688	74.9529	0.0211169
63.5762	0.0182328	82.6121	0.0240655
69.0422	0.0200042	83.971	0.0252499
73.5099	0.0238047	85.4305	0.0275466
74.4587	0.0212467	87.8006	0.0293623
76.8212	0.0268291	91.3907	0.0317651
79.4702	0.0291372	94.3788	0.0330546
81.457	0.030729	96.901	0.0348719
86.5797	0.0313215	98.5481	0.037442
89.4851	0.0289779	101.945	0.0384695
89.6821	0.0275505	113.907	0.0409995
96.1763	0.027324	119.868	0.0383744
97.6834	0.0288072	123.841	0.0413989
98.0787	0.035175	126.529	0.0432475
98.707	0.0365145	129.962	0.0442593
99.8453	0.0323478	134.645	0.0438915
101.142	0.0341293	135.979	0.0431302
101.513	0.0398739	139.685	0.0412605
103.551	0.0413587	146.356	0.0385106
105.066	0.0426983	150.576	0.0370488
110.63	0.0384801	150.804	0.0384122
111.797	0.0403518	152.318	0.0357536
117.221	0.0372593	155.707	0.0344059
123.749	0.036994	160.17	0.033159
127.541	0.0414161	162.416	0.0319125
129.494	0.0384534	164.145	0.0308376
129.573	0.040346	165.298	0.0298001
135.761	0.041514	166.74	0.0287013
137.323	0.0396419	167.926	0.0274389
138.627	0.0371952	169.199	0.0260661
141.909	0.0332377	171.681	0.0245588
143.021	0.0321394	180.795	0.0193655
145.059	0.0308696	181.457	0.0173763
146.48	0.029431	186.755	0.0161039
147.839	0.0282458	200.662	0.0148329
149.97	0.0268673	210.175	0.0121034
152.657	0.0257321	213.148	0.0106819
155.992	0.0246194	215.222	0.00950925
158.216	0.0235309	217.513	0.00841403
159.42	0.0224434	220.725	0.0075035
163.24	0.0211285	224.554	0.00646957
170.816	0.0215703	229.372	0.00547059
175.966	0.02062	237.361	0.00541411
177.932	0.0238012	246.091	0.00501486
178.97	0.0224521	253.642	0.00616758
182.182	0.0254318	266.04	0.00285327
183.911	0.0238631	272.455	0.00221617
184.594	0.0172848	303.037	0.00145553
186.382	0.0198036	321.177	0.00127789
187.97	0.0162636	326.471	0.00100905
193.629	0.0175757	352.413	0.000810352
198.982	0.0179175	358.94	0.000693625
201.947	0.0158347	374.172	0.000775625
204.665	0.0147527	486.755	0.000395665
206.934	0.0136534
208.371	0.012734
208.989	0.0151314
212.654	0.0116536
216.401	0.00903173
219.736	0.0130179
221.878	0.0114076
224.554	0.00653925
229.125	0.00829527
232.109	0.00560655
236.488	0.00739023
238.065	0.00610238
242.191	0.00911442
243.792	0.00777301
244.567	0.00517372
246.42	0.00640914
249.961	0.00494016
252.514	0.00572979
256.89	0.00445141
262.233	0.00385452
267.915	0.00505232
276.069	0.00428848
279.775	0.00212726
284.531	0.00461167
288.563	0.00200937
289.904	0.00377384
291.634	0.0027764
294.381	0.00178547
296.549	0.00177368
301.543	0.00153348
310.005	0.00151971
311.811	0.00308956
317.576	0.00378904
323.259	0.00259659
326.026	0.00100601
334.624	0.000420165
342.566	0.000744411
350.646	0.000886284
362.049	0.00033378
370.202	0.000815615
377.702	0.000234884
387.065	0.000291154
392.439	0.00162295
400.592	0.000851016
403.804	0.000227784
410.501	0.000275812
419.123	0.00013741
427.276	0.000175142
435.429	4.6893e-05
443.583	2.7949e-05
451.736	0.000102117
459.889	0.000147946
468.043	3.18418e-05
476.196	6.55261e-05
492.503	0.000112653

## Sheet: Fig5-sup2E-spintime-NTA-profile
2h	Tube 1	Tube 2	Tube 3				16h	Tube 1	Tube 2	Tube 3
	concentration (mL^-1)	concentration (mL^-1)	concentration (mL^-1)	average (mL^-1)	stdev (mL-1)			concentration (mL^-1)	concentration (mL^-1)	concentration (mL^-1)	average (mL^-1)	stdev (mL-1)
1-DG-1	5000000000	4200000000	14000000000	7.73333e+09	5.44181e+09		1-DG-1	2900000000	2100000000	3000000000	2.66667e+09	4.93288e+08
1-DG-2	530000000	470000000	500000000	500000000	30000000		1-DG-2	2800000000	2500000000	2600000000	2.63333e+09	1.52753e+08
1DG-3	4800000000	6100000000	5400000000	5.43333e+09	6.50641e+08		1DG-3	9800000000	7600000000	6600000000	8000000000	1.63707e+09
1-DG-4	28000000000	23000000000	30000000000	27000000000	3.60555e+09		1-DG-4	28000000000	28000000000	33000000000	2.96667e+10	2.88675e+09
