# Supplementary material for: Isolation of small extracellular vesicles from small volumes of blood plasma using size exclusion chromatography and density gradient ultracentrifugation
Source: eLife. 2026 May 22;13:RP92796. doi: 10.7554/eLife.92796 (PMC13197162; doi:10.7554/eLife.92796)
Supplement: Figure 5—source data 1. [file elife-92796-fig5-data1.xlsx]

## Sheet: ReadMe
Source data for Figure 5.
This file contains numerical data corresponding to the particle concentrations, density distribution, particle size histograms and RNA content indicated by arrows in Figure 5.
The data include:
Particle concentrations measured by nanoparticle tracking analysis (NTA).
Density distributions along different fractions.
Particle size histograms derived from TEM images.
RNA profiles corresponding to the fractions indicated by the arrow.

## Sheet: Particle conc along fractions
Fraction	Particle concentration (10^11 mL^-1)					Values reconstructed from plotted curves due to unavailability of original files.
1	1
2	0.088
3	0.304
4	0.496
5	0.328
6	0.712
7	1.816
8	1.816
9	2.296
10	2.392
11	3.112
12	3.592
13	3.976

## Sheet: Density dist along fractions
Fraction	Density (g/mL)	stdev (g/mL)						Values reconstructed from plotted curves due to unavailability of original files.
1	1.10349	0.00342852
2	1.08068	0.00399883
3	1.07501	0.00114284
4	1.07391	0.000571421
5	1.07111	0.000571421
6	1.06772	0.000571421
7	1.05977	0.00114284
8	1.05239	0.000570311
9	1.04558	0.000571421
10	1.0422	0.000571421
11	1.03939	0.000570311
12	1.03887	0.00057253

## Sheet: Size Histogram derived from TEM
fraction 13		fraction 8		fraction 5		fraction 1					Values reconstructed from plotted curves due to unavailability of original files.
bin (nm)	Count	bin (nm)	Count	bin (nm)	Count	bin (nm)	Count
5	5	5	2	5	0	5	1
10	11	10	20	10	18	10	0
15	89	15	30	15	34	15	2
20	191	20	697	20	126	20	41
25	170	25	316	25	45	25	24
30	156	30	86	30	63	30	30
35	129	35	87	35	110	35	26
40	92	40	87	40	131	40	46
45	90	45	69	45	125	45	25
50	42	50	50	50	106	50	31
55	35	55	31	55	69	55	14
60	25	60	13	60	45	60	15
65	18	65	12	65	32	65	19
70	9	70	0	70	34	70	18
75	5	75	0	75	20	75	14
80	5	80	0	80	16	80	5
85	4	85	0	85	8	85	7
90	5	90	0	90	2	90	4
95	2	95	0	95	3	95	1
100	2	100	0	100	3	100	8
105	0	105	0	105	3	105	1
110	0	110	0	110	0	110	1
115	0	115	0	115	2	115	1
120	0	120	0	120	0	120	0
125	0	125	0	125	0	125	0
130	0	130	0	130	3	130	4
135	0	135	0	135	0	135	0
140	0	140	0	140	2	140	3
145	0	145	0	145	0	145	0
150	0	150	0	150	0	150	0
155	0	155	0	155	0	155	0
160	0	160	0	160	0	160	0
165	0	165	0	165	0	165	0
170	0	170	0	170	2	170	0
175	0	175	0	175	0	175	0
180	0	180	0	180	0	180	1

## Sheet: RNA profiles
SEC-DGUC-1		SEC-DGUC-2		SEC-DGUC-3		SEC-DGUC-4			Values reconstructed from plotted curves due to unavailability of original files.
RNA size (nt)	FU	RNA size (nt)	FU	RNA size (nt)	FU	RNA size (nt)	FU
9.567	0	9.418	0	9.131	0	8.314	0
10.782	0	9.872	0.144	10.186	0	8.85	0
12.153	0	10.607	0	11.468	0	9.202	0
13.697	0	11.946	0	12.911	0	9.798	0
15.438	0	13.454	0	14.536	0	11.035	0
17.4	0	15.152	0.002	16.365	0	12.428	0
19.611	0	16.399	0.144	18.424	0	13.997	0
21.983	0	17.065	0.007	20.743	0	15.764	0
22.961	1.216	19.22	0	22.781	0.164	17.052	0
23.593	2.338	21.647	0.063	23.075	1.504	17.755	0
23.662	4.932	23.73	0.367	23.674	2.5	19.996	0
23.849	11.622	23.73	1.057	24.234	3.333	21.054	0
24.418	12.432	24.17	2.551	24.423	7.444	21.702	0.229
24.804	14.392	25.302	6.944	24.423	12.389	21.892	0.718
25.396	20.608	25.378	10.578	25.319	16.659	23.013	1.071
25.46	16.182	25.457	9.609	25.319	15.653	23.122	5.359
25.46	15.34	25.457	9.008	25.319	14.807	24.101	6.202
25.808	12.674	25.457	8.626	25.319	13.961	24.247	14.646
26.592	11.552	26.438	6.011	25.319	13.48	24.291	15.869
26.592	10.523	26.438	5.464	26.195	11.389	24.291	13.744
26.592	9.494	26.438	4.916	26.195	9.278	24.291	12.903
26.592	8.465	26.438	4.368	26.195	5.889	24.291	12.061
26.592	7.436	26.438	3.82	26.618	1.647	24.291	11.22
26.592	6.407	26.438	3.273	28.839	0.723	24.291	10.379
26.592	5.378	26.438	2.725	32.615	1.018	24.291	9.537
26.592	4.349	26.438	2.177	36.719	1.301	24.291	8.696
26.592	3.321	26.524	1.385	41.34	1.004	24.291	7.855
26.592	2.292	27.242	1.043	46.542	0.437	24.379	7.177
28.525	0.693	27.392	0.545	52.399	0.119	25.393	5.083
32.166	0.716	29.938	0.192	59.317	0	26.2	3.811
37.253	1.543	33.717	0.446	66.417	0	26.342	2.83
40.64	2.189	37.974	0.443	74.775	0	26.342	1.989
44.214	3.031	42.769	0.328	84.857	0	26.342	0.803
48.893	1.46	48.168	0.136	94.78	0	28.259	0.132
54.511	0.395	54.25	0.111	106.707	0	31.827	0.466
61.438	0.327	61.099	0.074	120.135	0	35.846	0.727
69.246	0.327	68.813	0	135.253	0	40.371	0.313
78.046	0.166	77.501	0.07	152.274	0	45.468	0.115
87.964	0	87.285	0.074	171.436	0	51.209	0.031
97.538	0	98.306	0.054	193.01	0	57.674	0
114.199	0.208	110.717	0.052	217.299	0	64.885	0
128.712	0.145	124.695	0.009	244.645	0	73.157	0
145.069	0	140.439	0	277.032	0.222	82.393	0
163.505	0	158.169	0	310.093	0.098	93.804	0
182.29	0	180.24	0	331.347	0.111	105.647	0
207.702	0	200.629	0	349.116	0.032	118.985	0
234.098	0	225.96	0	369.497	0.389	134.007	0
263.848	0	254.488	0	393.05	0.081	151.089	0
297.378	0	286.618	0	418.504	0.167	169.981	0
335.17	0	322.804	0	442.512	0.252	191.442	0
377.764	0	363.559	0	470.336	0.167	215.612	0
425.772	0	409.46	0	498.199	0.214	242.833	0
479.88	0	461.156	0	560.894	0.238	273.492	0
540.864	0	519.378	0	631.478	0.329	306.504	0
609.599	0	584.951	0	672.843	0.056	321.205	0
687.069	0	658.804	0	710.945	0.332	350.68	0
774.383	0	741.98	0	800.412	0.367	394.955	0
867.537	0	835.657	0	901.138	0.367	444.819	0
983.711	0	941.162	0	1014.54	0.367	467.248	0
1108.72	0	1077.41	0	1142.21	0.367	500.979	0
1249.62	0	1193.81	0.056	1285.95	0.367	564.229	0
1408.43	0	1344.54	0.068	1447.78	0.367	635.465	0
1587.42	0	1514.29	0.038	1629.97	0.367	715.695	0
1789.15	0	1705.47	0.038	1835.09	0.367	782.259	0
2016.52	0	1920.8	0.093	2066.03	0.367	806.054	0
2187.9	0.431	2163.3	0.179	2326.02	0.367	907.821	0
2376.43	1.456	2436.43	0.185	2618.73	0.367	1016.93	0
2675.52	0.604	2744.03	0.138	2948.28	0.367	1102.94	0.11
3058.47	0	3090.48	0.185	3319.3	0.367	1151.52	0
3435.92	0	3480.66	0.156	3700.45	0.389	1299.71	0
3872.56	0	3920.11	0.185	4207.29	0.367	1394.06	0
4364.7	0	4415.03	0.185	4736.74	0.367	1460.64	0
4919.38	0	4972.45	0.185	5332.83	0.367	1645.06	0
5544.55	0.077	5600.24	0.185	6003.93	0.346	1852.75	0
6249.16	0	6307.28	0.185	6381.06	0.333	2086.67	0
7043.32	0	7103.6	0.145	6759.48	0	2350.12	0
7938.41	0	7587.84	0	7171.36	0.222	2646.83	0
8947.25	0	8000.45	0.09	7610.11	0.305	2981	0
10084.3	0	8464.31	0	8567.78	0.312	3357.36	0
11365.8	0	9010.54	0.002	8987.47	0.056	3781.24	0
12810.2	0	10148.2	0.185	9645.98	0.196	4258.63	0
14438.2	0	11429.4	0.185	10179.5	0.111	4796.3	0
16273	0	12872.4	0.185	10859.9	0.308	5401.85	0
18341.1	0	14497.6	0.185	12226.5	0.367	6083.85	0
20671.9	0	16327.9	0.185	13765.1	0.367	6851.95	0
23298.9	0	18389.4	0.185	15497.3	0.367	7717.04	0
26259.8	0	20938.3	0.18	17447.6	0.367	8691.34	0
29597	0	23326	0.185	19643.2	0.367	9788.65	0
33358.3	0	26271	0.185	22115.2	0.367	11024.5	0
37597.6	0	29587.8	0.185	25111.4	0.389	12416.4	0
47760.8	0	33323.3	0.185	28031.5	0.367	13984	0
53830.4	0	34782	0.288	31559	0.367	15749.5	0
60671.3	0	35606.3	0	35530.5	0.367	17737.9	0
68381.6	0	37530.5	0.106	40001.8	0.367	19977.4	0
77071.7	0	42268.9	0.151	45035.7	0.367	22638.7	0
86866.2	0	44654.4	0.036	50703.1	0.367	25340.3	0
97905.4	0	47605.4	0.163	57083.7	0.367	28539.6	0
110347	0	53615.8	0.185	64267.3	0.367	32142.8	0
124371	0	60385	0.185	72354.9	0.367	32421.7	0
		67543.8	0.18	81460.2	0.367	36201	0
		76595.1	0.185	91711.4	0.367	40771.5	0
		86265.5	0.185	103253	0.367	45919	0
		97156.8	0.185	116246	0.367	51716.4	0
		109423	0.188	128085	0.362	58245.8	0
		123238	0.129			65599.5	0
		126143	0			73881.7	0
		135829	0.192			83209.5	0
						93715	0
						105547	0
						116961	0
