# Supplementary material for: Isolation of small extracellular vesicles from small volumes of blood plasma using size exclusion chromatography and density gradient ultracentrifugation
Source: eLife. 2026 May 22;13:RP92796. doi: 10.7554/eLife.92796 (PMC13197162; doi:10.7554/eLife.92796)
Supplement: Figure 7—source data 1. [file elife-92796-fig7-data1.xlsx]

## Sheet: ReadMe
Source data for Figure 7.
This file contains numerical data corresponding to the quantitative data shown in Figure 7.
The data represent measured size histograms derived from TEM images of SEC-DGUC-1 and DGUC-SEC-PF, and RNA profiles of the sEV isolates derived from the two assays.
Source data for Figure 7.
This file contains numerical data corresponding to panels 7B, 7E, and 7F in Figure 7.
The data include:
- Particle diameter distributions derived from TEM images (panel 7B)
RNA electropherogram profiles of sEVs derived from the SEC-DGUC and DGUC-SEC assays, showing fluorescence intensity across RNA sizes (panels 7E and 7F)
The datasets correspond to small extracellular vesicle (sEV) isolates obtained using different methods, including SEC-DGUC-1 and SEC-PF.
Sheet descriptions:
Figure7B_size histograms: Particle diameter distributions of sEV isolates using SEC-DGUC and DGUC-SEC protocols, derived from TEM images
Figure7E_RNA: RNA electropherogram data for sEV isolates derived from SEC-DGUC protocol.
Figure7F_RNA: RNA electropherogram data for sEV isolates derived from DGUC-SEC protocol.

## Sheet: Figure7B-size histograms
SEC-DGUC-1		DGUC-SEC-PF				Values reconstructed from plotted curves due to unavailability of original files.
bin(nm)	Fraction	bin(nm)	Fraction
5	0.009	5	0
10	0.046	10	0.002
15	0.128	15	0.007
20	0.204	20	0.068
25	0.116	25	0.225
30	0.124	30	0.23
35	0.111	35	0.135
40	0.09	40	0.055
45	0.094	45	0.04
50	0.021	50	0.037
55	0.004	55	0.055
60	0.021	60	0.037
65	0.005	65	0.018
70	0.017	70	0.022
75	0	75	0.002
80	0	80	0.007
85	0	85	0.007
90	0	90	0.014
95	0	95	0.002
100	0	100	0
105	0	105	0
110	0	110	0.011
115	0	115	0
120	0.004	120	0.002

## Sheet: Figure7E-RNA profile
SEC-DGUC-1									Values reconstructed from plotted curves due to unavailability of original files.
RNA size (nt)	FU
9.228	0
10.632	0
12.066	0
13.692	0.023
15.538	0.032
17.632	0
20.009	0.082
22.19	0.364
22.8	1.129
22.837	2.247
23.38	3.097
23.775	4.481
23.975	10.31
24.585	16.903
25.037	20.224
25.636	11.475
26.366	10.09
26.366	9.54
26.366	8.99
26.366	8.44
26.366	7.89
26.366	7.34
26.366	6.79
26.366	6.24
26.366	5.69
26.62	2.339
26.671	4.906
26.671	4.356
26.671	3.806
26.671	3.256
26.957	1.421
28.124	0.895
32.056	1.005
34.368	1.311
36.377	1.614
39.516	2.074
41.321	2.805
44.184	3.789
45.689	3.097
46.31	2.364
48.211	1.741
51.456	1.056
55.025	0.591
62.363	0.336
72.507	0.341
82.281	0.314
93.372	0.309
105.959	0.3
121.012	0.342
136.449	0.318
154.842	0.264
175.714	0.255
199.4	0.268
226.278	0.287
256.779	0.232
291.392	0.278
330.67	0.241
375.243	0.214
425.825	0.196
483.224	0.214
548.361	0.228
622.277	0.218
706.158	0.241
801.345	0.423
863.892	0.765
909.362	0.669
1031.94	0.414
1171.04	0.328
1340.83	0.208
1508.02	0.214
1711.3	0.196
1941.97	0.2
2178.55	0.547
2320.74	1.227
2440.44	1.931
2609.55	1.457
2748.71	0.859
2956.29	0.264
3183.62	0.214
3587.38	0.146
4076.25	0.214
4573.56	0.146
5100.52	0.273
5788.05	0.309
6530.61	0.134
7539.81	-0.013
8556.15	-0.013
9709.48	-0.022
11018.3	-0.022
12503.5	0.014
14188.9	0.032
16101.5	0.05
18271.9	0.041
20761.4	0.042
23260.9	0.042
27079.4	0.053
30808.2	0.042
35185	0.023
39927.8	0.041
45367.9	0.064
51417.5	0.1
57350.9	0.039
63967.7	0.146
70140.6	0.182
81904.6	0.014
96760.9	0.187
109804	0.196
119691	0.189
139385	0.146
152372	0.114

## Sheet: Figure7F-RNA profile
DGUC-SEC									Values reconstructed from plotted curves due to unavailability of original files.
RNA size (nt)	FU
10.001	0
11.999	0
13.6	0
15.414	0
17.272	0
20.179	0.003
22.151	0.147
22.828	1.231
22.828	0.861
22.828	0.541
23.089	1.761
23.81	2.611
23.81	2.241
23.985	4.266
23.985	7.527
24.386	13.313
25	13.583
25.63	11.597
25.63	4.413
26.318	3.722
26.318	3.351
26.318	2.981
26.318	2.611
26.318	2.241
26.771	1.483
26.771	1.113
27.294	0.682
28.285	0.35
31.576	0.487
33.143	0.711
34.982	0.951
39.648	0.731
44.682	0.595
50.354	0.192
58.007	0
61.454	0
71.077	0
79.393	0
89.983	0
101.986	0
115.59	0
131.008	0
148.483	0
168.289	0
190.737	0
216.18	0
249.033	0
277.699	0
314.741	0
338.911	0
379.519	0
427.986	0
485.075	0
534.354	0.003
619.577	0
718.393	0
787.346	0
847.313	0.009
960.336	0
1070.01	0
1247.74	0
1419.56	0
1602.82	0
1816.62	0
2058.93	0
2333.57	0.058
2644.85	0.015
2997.65	0
3430.81	0
3850.69	0
3850.69	0
3903.65	0
4241.89	0
4266.1	0
4364.34	0
4364.34	0
4965.3	0
4965.3	0
5449.01	0
5574.49	0
5574.49	0
5702.85	0
6364.2	0
6364.2	0
6688.09	0
6842.1	0
6842.1	0
7201.71	0
7201.71	0
7906.29	0
8162.34	0
8162.34	0
8208.93	0
8350.3	0
8640.38	0
9042.88	0
9251.11	0
9251.11	0
10485.1	0
10485.1	0
11883.7	0
11883.7	0
12157.4	0
12651.5	0
12869.4	0.003
12869.4	0
13545.8	0
13700.8	0
14016.3	0
14176.8	0
15131	0
15131	0
15706.2	0
15706.2	0
16626	0
17192.7	0
17192.7	0
19059.5	0
19059.5	0
19059.5	0
19498.4	0
19609.7	0.018
19609.7	0
20523.2	0
22225.4	0.018
22225.4	0
22565.3	0
22737.2	0
22866.9	0
24483.3	0
25190	0
25190	0
25770.1	0
27749.1	0
28550.1	0.018
28550.1	0
31810.6	0
32358.4	0.009
32358.4	0
32543.1	0
34123.8	0
36466.5	0
36674.7	0.015
36674.7	0
37094.5	0
40708.3	0
41566.7	0.03
41566.7	0
43256.2	0
47051.7	0.066
47051.7	0
48471.2	0
53395.5	0.033
53395.5	0
60517.9	0
60517.9	0
64427.8	0
68590.3	0.036
68590.3	0
70650.6	0
73021.8	0
77739.6	0.049
77739.6	0
79859.6	0
84187.4	0
85637.2	0
87609.2	0
88109.2	0.076
88109.2	0
91170.1	0
99735.9	0.077
99735.9	0
113183	0.067
113183	0
128280	0.036
128280	0
