# Supplementary material for: Isolation of small extracellular vesicles from small volumes of blood plasma using size exclusion chromatography and density gradient ultracentrifugation
Source: eLife. 2026 May 22;13:RP92796. doi: 10.7554/eLife.92796 (PMC13197162; doi:10.7554/eLife.92796)
Supplement: Figure 8—figure supplement 1—source data 1. [file elife-92796-fig8-figsupp1-data1.xlsx]

## Sheet: Sheet2
Source data for Figure 8–figure supplement 1.
This file contains numerical data corresponding to the flow cytometry analysis shown in Figure 8–figure supplement 1.
The data represent median fluorescence intensity (MFI) values obtained using the MACSPlex exosome kit for two plasma samples (Sample 2 and Sample 3), comparing SEC-DGUC-1 and SEC-PF isolation methods.
Each sample includes measurements of multiple surface markers, with values reported as mean ± SEM.
Sheet descriptions:
Fig8-supp1_sample2: Flow cytometry data for Sample 2
Fig8-supp1_sample3: Flow cytometry data for Sample 3

## Sheet: Fig8-supp1-sample2
Sample 2 (Fluorescent Intensity)							Values reconstructed from plotted curves due to unavailability of original files.
	SEC-DGUC-1	stdev	SEC-PF	stdev
CD3	-117.073	29.2683	-97.561	29.2683
CD4	117.073	19.5122	48.7805	9.7561
CD19	58.5366	19.5122	-19.5122	19.5122
CD8	48.7805	19.5122	48.7805	19.5122
HLA-DRDPDQ	234.146	39.0244	58.5366	9.7561
CD56	29.2683	39.0244	-107.317	19.5122
CD105	68.2927	19.5122	-39.0244	19.5122
CD2	87.8049	19.5122	78.0488	19.5122
CD1c	29.2683	29.2683	39.0244	9.7561
CD25	-9.7561	19.5122	-19.5122	0
CD49e	136.585	29.2683	-9.7561	9.7561
ROR1	-9.7561	29.2683	-107.317	9.7561
CD209	-19.5122	39.0244	9.7561	19.5122
CD9	390.244	48.7805	87.8049	39.0244
SSEA-4	-9.7561	29.2683	-97.561	29.2683
HLA-ABC	887.805	68.2927	-58.5366	9.7561
CD63	58.5366	29.2683	48.7805	9.7561
CD40	312.195	29.2683	-58.5366	19.5122
CD62P	117.073	29.2683	58.5366	19.5122
CD11c	68.2927	39.0244	-39.0244	9.7561
CD81	29.2683	29.2683	-39.0244	9.7561
MCSP	68.2927	19.5122	58.5366	19.5122
CD146	58.5366	29.2683	0	19.5122
CD41b	2214.63	341.463	19.5122	9.7561
CD42a	4565.85	858.537	-29.2683	19.5122
CD24	185.366	29.2683	117.073	19.5122
CD86	-68.2927	19.5122	-87.8049	9.7561
CD44	107.317	19.5122	19.5122	19.5122
CD326	-29.2683	29.2683	-68.2927	19.5122
CD133/1	29.2683	39.0244	48.7805	9.7561
CD29	1024.39	126.829	87.8049	19.5122
CD69	117.073	29.2683	58.5366	39.0244
CD142	107.317	39.0244	39.0244	29.2683
CD45	136.585	48.7805	0	9.7561
CD31	360.976	58.5366	68.2927	19.5122
REA Control	-9.7561	29.2683	-19.5122	19.5122
CD209	-19.5122	39.0244	39.0244	9.7561
CD14	-29.2683	19.5122	-48.7805	48.7805
mIgG1 control	-29.2683	39.0244	-9.7561	9.7561

## Sheet: Fig8-supp1-sample3
Sample 3 (Fluorescent Intensity)							Values reconstructed from plotted curves due to unavailability of original files.
	SEC-DGUC-1	stdev	SEC-PF	stdev
CD3	99.7033	33.2344	-132.938	24.9258
CD4	-16.6172	16.6172	58.1602	8.30861
CD19	-24.9258	16.6172	8.30861	24.9258
CD8	265.875	16.6172	8.30861	16.6172
HLA-DRDPDQ	315.727	33.2344	24.9258	16.6172
CD56	41.543	33.2344	-99.7033	24.9258
CD105	-58.1602	24.9258	8.30861	16.6172
CD2	0	24.9258	-41.543	8.30861
CD1c	-33.2344	33.2344	-24.9258	24.9258
CD25	-8.30861	16.6172	-49.8516	33.2344
CD49e	124.629	24.9258	16.6172	8.30861
ROR1	16.6172	16.6172	-91.3947	16.6172
CD209	-58.1602	16.6172	33.2344	24.9258
CD9	382.196	58.1602	58.1602	8.30861
SSEA-4	-157.864	33.2344	-132.938	24.9258
HLA-ABC	664.688	66.4688	-99.7033	33.2344
CD63	24.9258	24.9258	16.6172	49.8516
CD40	224.332	41.543	-24.9258	24.9258
CD62P	922.255	33.2344	74.7774	24.9258
CD11c	24.9258	24.9258	-8.30861	16.6172
CD81	41.543	24.9258	-83.0861	33.2344
MCSP	49.8516	24.9258	58.1602	8.30861
CD146	16.6172	8.30861	16.6172	24.9258
CD41b	1404.15	149.555	24.9258	0
CD42a	2193.47	299.11	16.6172	24.9258
CD24	265.875	16.6172	58.1602	16.6172
CD86	-83.0861	24.9258	-58.1602	8.30861
CD44	756.083	41.543	8.30861	8.30861
CD326	-83.0861	16.6172	-83.0861	33.2344
CD133/1	41.543	8.30861	41.543	16.6172
CD29	747.774	74.7774	0	8.30861
CD69	108.012	33.2344	66.4688	16.6172
CD142	41.543	8.30861	-33.2344	8.30861
CD45	91.3947	24.9258	-24.9258	8.30861
CD31	282.493	49.8516	16.6172	8.30861
REA Control	-49.8516	8.30861	0	24.9258
CD209	0	41.543	-33.2344	24.9258
CD14	-8.30861	24.9258	-49.8516	24.9258
mIgG1 control	0	24.9258	-83.0861	24.9258
