# Supplementary material for: Isolation of small extracellular vesicles from small volumes of blood plasma using size exclusion chromatography and density gradient ultracentrifugation
Source: eLife. 2026 May 22;13:RP92796. doi: 10.7554/eLife.92796 (PMC13197162; doi:10.7554/eLife.92796)
Supplement: Figure 8—source data 1. [file elife-92796-fig8-data1.xlsx]

## Sheet: ReadMe
Source data for Figure 8.
This file contains numerical data corresponding to panels 8C and 8D in Figure 8.
The data represent flow cytometry measurements of surface marker expression on small extracellular vesicles (sEVs), shown as bar graphs in the figure.
Sheet descriptions:
Figure8C_FACS: Quantitative flow cytometry data corresponding to panel 8C
Figure8D_FACS: Quantitative flow cytometry data corresponding to panel 8D

## Sheet: Figure 8C-FACS
	SEC-DGUC	stdev	SEC	stdev
CD3	1153.74	108.844	-76.1905	43.5374
CD4	-21.7687	10.8844	32.6531	21.7687
CD19	65.3061	43.5374	10.8844	21.7687
CD8	718.367	32.6531	-54.4218	43.5374
HLA-DRDPDQ	1012.24	65.3061	54.4218	10.8844
CD56	-32.6531	87.0748	-87.0748	43.5374
CD105	54.4218	87.0748	21.7687	32.6531
CD2	195.918	43.5374	-10.8844	32.6531
CD1c	130.612	43.5374	108.844	32.6531
CD25	65.3061	54.4218	-32.6531	32.6531
CD49e	54.4218	54.4218	-65.3061	32.6531
ROR1	43.5374	54.4218	21.7687	21.7687
CD209	141.497	32.6531	21.7687	21.7687
CD9	925.17	119.728	32.6531	32.6531
SSEA-4	337.415	97.9592	97.9592	32.6531
HLA-ABC	1186.39	206.803	-152.381	43.5374
CD63	97.9592	43.5374	-87.0748	21.7687
CD40	936.054	87.0748	65.3061	32.6531
CD62P	587.755	76.1905	-97.9592	32.6531
CD11c	-32.6531	54.4218	43.5374	43.5374
CD81	359.184	43.5374	32.6531	21.7687
MCSP	119.728	54.4218	21.7687	21.7687
CD146	195.918	32.6531	21.7687	21.7687
CD41b	1502.04	261.224	21.7687	32.6531
CD42a	12767.3	1164.63	65.3061	10.8844
CD24	1512.93	54.4218	65.3061	32.6531
CD86	293.878	65.3061	97.9592	21.7687
CD44	914.286	65.3061	-43.5374	32.6531
CD326	141.497	54.4218	-54.4218	32.6531
CD133/1	-32.6531	43.5374	54.4218	21.7687
CD29	12145.5	0	-10.8844	43.5374
CD69	174.15	54.4218	-10.8844	32.6531
CD142	-10.8844	10.8844	-130.612	43.5374
CD45	544.218	76.1905	-10.8844	32.6531
CD31	391.837	97.9592	54.4218	32.6531
REA Control	-87.0748	32.6531	32.6531	21.7687
CD209	108.844	65.3061	21.7687	43.5374
CD14	87.0748	43.5374	-32.6531	43.5374
mIgG1 control	130.612	54.4218	54.4218	32.6531

## Sheet: Figure 8D-FACS
	plasma	SEC-DGUC-1	SEC-PF	UC
CD3	0.00155039	0	0	0
CD4	0	0	0	0
CD19	0	0	0	0
CD8	0.00155039	0.00155039	0.00620155	0.027907
HLA-DRDPDQ	0	0.00775194	0.075969	0.525581
CD56	0	0.00465116	0	0
CD105	0	0	0.0155039	0.0310078
CD2	0.00155039	0	0	0
CD1c	0	0.00155039	0	0
CD25	0.00155039	0	0	0
CD49e	0	0	0	0
ROR1	0.00775194	0	0	0
CD209	-0.00310078	0	0	0
CD9	0.048062	0.0790698	0.100775	0.105426
SSEA-4	0	0.00155039	0	0
HLA-ABC	0.0248062	0.0310078	0.0511628	0.0728682
CD63	0.0294574	0.0403101	0.0170543	0.0387597
CD40	0.055814	0.0341085	0.130233	0.00775194
CD62P	0.0527132	0.020155	0.00155039	0
CD11c	0	0	0	0
CD81	0.00775194	0.0170543	0.0356589	0.243411
MCSP	0	0	0	0
CD146	0	0.00155039	0.00930233	0.0325581
CD41b	0.134884	0.262016	0.167442	0.0511628
CD42a	0.462016	0.35969	0.330233	0.0527132
CD24	0	0	0	0
CD86	0	0	0	0
CD44	0	0	0	0
CD326	0.0124031	0	0	0
CD133/1	0.00465116	0	0	0
CD29	0.075969	0.155039	0.117829	0.186047
CD69	0.0139535	0	0	0
CD142	0	0	0	0
CD45	0.00155039	0.00155039	0.00310078	0
CD31	0.0682171	0.0697674	0.114729	0.0139535
REA Control	0	0	0	0
CD209	0	0	0.00155039	0
CD14	0	0	0	0
mIgG1 control	0	0	0	0
