# Supplementary material for: Isolation of small extracellular vesicles from small volumes of blood plasma using size exclusion chromatography and density gradient ultracentrifugation
Source: eLife. 2026 May 22;13:RP92796. doi: 10.7554/eLife.92796 (PMC13197162; doi:10.7554/eLife.92796)
Supplement: Figure 9—source data 1. [file elife-92796-fig9-data1.xlsx]

## Sheet: ReadMe
Source data for Figure 9.
This file contains numerical data corresponding to panels 9A and 9B in Figure 9.
The data represent functional annotation and enrichment analysis of proteins identified by LC-MS/MS for small extracellular vesicle (sEV) isolates obtained using different methods.
Panel 9A corresponds to proteins identified in SEC-DGUC-1.
Panel 9B corresponds to proteins identified in SEC-PF.

## Sheet: Figure 9A-SEC-DGUC-1
	-log(P value)					Values reconstructed from plotted curves due to unavailability of original files.
Extracellular exosome	100.191
Blood microparticle	63.6835
Extracellular region	60.9004
Extracellular space	59.2633
Negative regulation of megakaryocyte differentiation	24.3929
Membrane	23.9018
CENP-A containing nucleosome	22.2647
Focal adhesion	21.4461
Blood coagulation	21.1187
Platelet alpha granule lumen	18.9905

## Sheet: Figure 9B-SEC-PF
	-log(P value)
Blood microparticle	60.1575
Extracellular space	55.1181
Extracellular region	54.0157
Extracellular exosome	45.0394
Platelet alpha granule lumen	22.8346
High-density lipoprotein particle	21.7323
Very-low-density lipoprotein particle	21.5748
Endoplasmic reticulum lumen	18.1102
Platelet aggregation	16.2205
Blood coagulation	15.5906
