# Supplementary material for: Isolation of small extracellular vesicles from small volumes of blood plasma using size exclusion chromatography and density gradient ultracentrifugation
Source: eLife. 2026 May 22;13:RP92796. doi: 10.7554/eLife.92796 (PMC13197162; doi:10.7554/eLife.92796)
Supplement: Figure 10—figure supplement 1—source data 1. [file elife-92796-fig10-figsupp1-data1.xlsx]

## Sheet: ReadMe
Source data for Figure 10–figure supplement 1.
This file contains numerical data corresponding to panels A–C.
Panels A–C show particle size distributions of SEC-PF measured by nanoparticle tracking analysis (NTA) across multiple experimental repeats. The distributions demonstrate the consistency of particle size profiles across independent SEC experiments.
Sheet descriptions:
Fig10-supp1A-NTA: Particle size distributions for panel A (8 repeats)
Fig10-supp1B-NTA: Particle size distributions for panel B (3 repeats)
Fig10-supp1C-NTA: Particle size distributions for panel C (4 repeats)

## Sheet: Fig10-supp1A-NTA
	repeat 1		repeat 2		repeat 3		repeat 4		repeat 5		repeat 6		repeat 7		repeat 8			Values reconstructed from plotted curves due to unavailability of original files.
size(nm)	fraction	size(nm)	fraction	size(nm)	fraction	size(nm)	fraction	size(nm)	fraction	size(nm)	fraction	size(nm)	fraction	size(nm)	fraction
4.89498	0.000225387	16.9207	1.8066e-05	10.7193	0.000758816	6.76056	0.000273598	19.7621	0.000792729	14.81	0.000164119	20.2817	0.000416747	10.4261	0.00115529
13.4442	0.000414768	25.6901	0.00110322	18.9503	0.00139598	13.5211	0.000410397	25.7058	5.27944e-05	22.6035	0.000264398	36.507	0.00275014	18.8995	0.00130033
21.9968	0.00123973	33.1268	0.000420413	26.1755	0.000757926	20.2817	0.00164159	41.6814	0.00243318	31.1277	0.000752825	49.5967	0.0051325	27.6589	0.000839667
30.5485	0.0019096	35.8182	0.00136076	33.1268	0.00192726	27.0423	0.00355677	46.5523	0.00376425	39.5503	0.00280344	51.2203	0.00828239	35.4466	0.00114679
38.1496	0.00241924	38.358	0.00343189	38.2311	0.00508793	35.831	0.00300958	49.1908	0.00569099	45.4224	0.00474214	52.0322	0.0108118	37.0253	0.00346641
41.22	0.00500221	41.2394	0.00549122	40.4185	0.00706157	39.2113	0.00588235	50.4955	0.0111286	47.0936	0.0071066	52.641	0.0127036	40.0577	0.00532237
43.771	0.00767851	48.176	0.0106115	42.138	0.00895423	43.2676	0.00916553	50.7042	0.0175487	47.7701	0.00907993	54.0845	0.0201524	42.0873	0.00709678
45.5416	0.0105353	52.9658	0.0156647	43.9324	0.0108136	44.6197	0.0125855	52.7324	0.0253575	48.6665	0.0111613	56.0913	0.0233969	43.9139	0.00903255
47.4476	0.0133624	53.8588	0.0182551	44.7257	0.0126906	46.6479	0.0166895	54.0845	0.0302894	49.5065	0.013296	58.3238	0.030183	47.0936	0.0111302
48.5326	0.0160038	54.9141	0.0208222	45.9435	0.0147579	48.6761	0.0207934	56.1127	0.0343996	49.728	0.0152525	58.5674	0.0319383	51.8292	0.0131329
49.8344	0.0184549	56.2942	0.0263579	47.0936	0.0176644	50.0282	0.0246238	57.9179	0.0391098	50.5776	0.017847	60.2519	0.0354945	52.5057	0.0148146
51.1602	0.0211608	56.8355	0.0394904	47.9054	0.0200623	52.0563	0.0291382	59.493	0.0442636	51.8292	0.0213674	61.1652	0.0381619	54.427	0.0199091
52.1474	0.0239911	57.7826	0.0304707	48.5819	0.0220482	52.7324	0.0335157	62.1972	0.0509767	52.5128	0.024206	63.6007	0.0455238	55.2795	0.0228141
53.3457	0.0271022	58.5268	0.0333702	49.4839	0.0247887	54.0845	0.0377565	62.8732	0.0556344	54.1632	0.0285946	64.5478	0.0486084	55.8883	0.0242193
54.6321	0.0303909	59.5415	0.0369689	50.4085	0.0279646	55.4366	0.0421341	66.1469	0.0621807	54.9953	0.031213	65.6302	0.0509939	56.5649	0.0264334
55.6698	0.0332455	61.977	0.0444953	50.6115	0.029564	56.7887	0.0466484	70.5012	0.0656355	56.102	0.0336891	67.4753	0.0737745	57.9179	0.0306661
56.3415	0.0355379	63.1948	0.0473533	51.6262	0.0312652	58.1408	0.0508892	71.5498	0.0675464	57.0884	0.0359035	68.6746	0.0613889	58.9327	0.0334269
57.2198	0.0380457	63.8036	0.0492525	52.3873	0.0339733	59.493	0.0549932	72.5984	0.0701049	57.8051	0.038177	70.5519	0.0790112	59.8122	0.0354998
57.9814	0.0407899	65.0214	0.0532967	53.3176	0.036236	60.8451	0.0599179	74.3662	0.0753637	58.2562	0.0403544	72.0669	0.0686929	61.977	0.044509
58.6483	0.0433775	65.8332	0.0560906	54.2241	0.0390414	61.5211	0.0640219	75.7183	0.0797476	58.7974	0.0425387	73.2266	0.0840599	63.2624	0.0476553
59.6068	0.0457951	66.6044	0.0686992	55.302	0.0421447	62.8732	0.0681259	80.101	0.0854709	60.0441	0.0465451	81.1361	0.0821557	64.0066	0.049746
60.5294	0.0484877	68.4716	0.0751393	55.6854	0.0441439	64.2254	0.0723666	85.1831	0.083175	61.3801	0.0511524	83.7803	0.079551	64.6155	0.0519601
61.7455	0.0518588	69.0805	0.0787434	56.3619	0.0461592	64.9014	0.0777018	89.985	0.0820684	61.7634	0.0533845	84.5052	0.0681115	65.6302	0.0545717
62.7792	0.0549353	69.5049	0.0772776	57.0249	0.0481868	67.6056	0.0822161	90.7968	0.0803027	62.5047	0.0558128	85.52	0.0705923	66.5774	0.0585473
63.886	0.0573878	74.4897	0.0896283	57.9179	0.0505257	70.9859	0.0860465	92.4205	0.0774444	64.0791	0.062146	86.7377	0.0743585	68.9587	0.0785069
64.942	0.0598765	78.2374	0.0833734	58.5268	0.0530344	74.3662	0.0906977	92.6234	0.0786782	64.7604	0.0647632	87.5901	0.0640612	70.1098	0.0805664
66.0609	0.0623709	79.7746	0.0801598	59.3386	0.0558393	77.7465	0.0948016	94.0072	0.0699191	66.0748	0.0669463	90.1541	0.0624334	71.9957	0.0830995
67.492	0.0651077	84.5052	0.0734998	60.0286	0.0584358	81.8028	0.0908345	95.0589	0.0676987	66.7231	0.069576	95.1459	0.0605191	72.8555	0.0856425
67.9886	0.0677503	85.9259	0.0691197	60.8405	0.0610178	83.831	0.0871409	96.9109	0.0601602	68.5497	0.0720825	101.107	0.0595861	73.8794	0.0884341
69.4006	0.0710458	86.7377	0.0672623	61.7741	0.0639606	83.831	0.0841313	97.765	0.0574618	69.7401	0.0743121	102.771	0.057461	75.3975	0.0898899
70.6189	0.0751715	89.004	0.0658224	62.3829	0.06537	85.1831	0.0819425	100.2	0.0539018	71.4032	0.0671294	104.192	0.0556314	80.0627	0.0885079
71.6543	0.0785724	95.3239	0.0630409	62.9512	0.0674922	85.1831	0.073461	102.771	0.0515811	72.4969	0.076519	105.41	0.0536178	88.8202	0.0845847
72.3922	0.0813095	98.1033	0.0590224	63.8036	0.0695507	85.8592	0.078249	103.867	0.0492089	72.7337	0.0700138	106.83	0.0506109	91.5579	0.0827794
73.0181	0.0842463	99.7269	0.0571251	64.514	0.071362	87.2113	0.0699042	105.753	0.046924	74.7789	0.0780727	108.86	0.0468322	92.7757	0.0808611
75.7706	0.0873497	101.351	0.0551851	65.2243	0.0727485	89.2394	0.0658003	106.817	0.0405784	77.0704	0.0755014	110.551	0.0446691	94.3283	0.0761327
77.2819	0.0900111	102.568	0.0532115	76.4962	0.0755029	91.2676	0.0625171	106.877	0.0447267	77.6453	0.0740392	112.446	0.0427276	95.1143	0.0731234
78.5096	0.0921815	103.989	0.0510666	80.4507	0.0764613	96	0.0615595	111.549	0.0371551	84.507	0.0742707	114.475	0.0404527	96.0368	0.0703758
82.4943	0.088732	105.178	0.0491566	83.1549	0.0745443	99.3803	0.0581395	113.934	0.033552	89.3987	0.0766462	115.05	0.0373137	96.7637	0.0679501
82.6144	0.085227	106.709	0.0470454	84.507	0.070846	102.085	0.0533516	118.839	0.0311283	89.8995	0.0749256	115.558	0.0390411	97.6394	0.0659693
83.6811	0.0821331	108.095	0.0450184	87.2113	0.0674221	105.465	0.0470588	120.794	0.0288002	91.8116	0.0731965	117.384	0.0349806	98.7798	0.0598515
84.9923	0.0798846	109.904	0.0429273	95.6678	0.06453	106.817	0.0424077	122.503	0.0266753	93.1511	0.071276	119.82	0.0329422	101.408	0.0523577
87.4262	0.0773295	111.623	0.0409601	97.6973	0.0624509	108.845	0.0377565	122.729	0.0246574	93.9934	0.0691686	121.421	0.0310199	102.761	0.0493444
90.6985	0.0747978	113.088	0.0391466	98.9151	0.0606265	110.197	0.0346101	124.379	0.0226243	94.5583	0.0588048	122.98	0.0287781	107.493	0.0420855
93.0021	0.0721604	114.933	0.0371428	100.133	0.0584061	113.577	0.0307798	131.301	0.0215484	96.1865	0.056988	124.488	0.0267722	108.845	0.0374283
94.5291	0.0694366	116.166	0.0356896	101.351	0.0562915	114.93	0.0269494	135.792	0.0196716	98.3265	0.0549428	125.462	0.0249792	109.521	0.0359217
95.8546	0.0669986	118.196	0.0339218	102.568	0.0543355	116.958	0.023119	143.768	0.016047	100.085	0.0527387	127.775	0.0212693	113.006	0.0331958
96.5897	0.0645322	119.414	0.0320922	102.568	0.0424644	118.986	0.0188782	146.813	0.013553	100.809	0.0506358	129.803	0.0185302	113.59	0.0312269
98.2653	0.061837	120.338	0.0282535	102.761	0.0470156	123.718	0.0162791	152.728	0.0106607	101.959	0.0486749	136.631	0.0139602	116.931	0.0274555
99.64	0.0591365	121.565	0.0232799	103.583	0.0526909	130.479	0.0177839	162.93	0.00634787	102.568	0.0469579	140.67	0.0119739	118.805	0.0253938
101.345	0.0564846	127.099	0.0214061	103.867	0.0404713	136.563	0.0135431	167.662	0.00936292	103.583	0.0451645	146.128	0.0098281	119.941	0.0234517
102.773	0.0537536	133.274	0.0176095	105.085	0.0384668	139.944	0.0102599	169.747	0.00844496	104.801	0.0433913	152.789	0.00716689	123.162	0.0216957
103.516	0.051061	135.523	0.0157268	106.729	0.0362806	148.056	0.00834473	175.436	0.00502172	106.222	0.0416583	156.845	0.00826394	126.423	0.0185292
104.515	0.0475949	137.525	0.0137199	108.896	0.03438	154.141	0.00601915	183.849	0.00357352	107.654	0.0398412	163.607	0.0074797	131.155	0.0166128
105.208	0.0444152	139.506	0.0118164	113.393	0.0327119	161.577	0.00355677	187.268	0.0025192	109.278	0.0380828	174.299	0.00616437	133.859	0.0146957
105.791	0.0416934	143.886	0.0107536	115.287	0.0306242	166.31	0.00287278	192.326	0.00283545	111.349	0.0361878	181.42	0.00713741	140.627	0.0114819
106.229	0.0386844	148.732	0.0115493	119.675	0.028243	171.718	0.00519836	199.581	0.00229532	112.513	0.0351128	185.757	0.00589567	150.085	0.00798804
107.316	0.0356665	154.817	0.00922227	121.646	0.026075	177.127	0.00246238	208.816	0.00256442	114.123	0.0335292	196.732	0.00416573	157.671	0.00571735
110.587	0.0330175	163.606	0.00607409	122.783	0.0238601	181.183	0.00150479	216.934	0.0010145	118.068	0.0309492	202.141	0.0029344	166.986	0.00443122
116.23	0.0329096	169.491	0.00703914	123.743	0.0210146	189.972	0.00232558	252.756	0.000135245	119.733	0.028629	210.93	0.00211499	173.248	0.00357487
117.355	0.0303517	175.609	0.0066572	125.299	0.0189872	196.732	0.00191518	264.223	0.00193235	122.31	0.0248341	215.818	0.00137167	181.253	0.0030236
119.424	0.0280314	179.184	0.00547106	128.344	0.0170923	208.225	0.00109439	273.127	0.000488906	125.024	0.0205143	234.084	0.00302502	190.68	0.00254704
121.778	0.0257785	186.947	0.00467649	131.429	0.0149155	215.662	0.00150479	289.097	0.00130895	134.535	0.0164768	242.704	0.00157611	198.085	0.0023853
123.877	0.0232877	195.38	0.00306946	143.538	0.0151089	221.07	0.000136799	297.001	0.00153391	139.944	0.0137386	254.85	0.000454041	204.845	0.000606406
125.193	0.0207149	201.465	0.00348215	146.028	0.0118225	228.507	0.00136799	331.944	0.000368705	147.38	0.010727	275.825	0.00185781	210.846	0.000827924
126.43	0.0185875	206.197	0.00266159	148.953	0.00937726	250.141	0.000273598	348.146	0.00116616	156.845	0.00552421	305.577	0.000498167	222.608	0.00158881
129.539	0.0162295	213.585	0.00362686	160.005	0.009395	340.732	0.000410397	494.197	0.000141038	165.939	0.00568751	327.211	0.000367355	236.114	0.000678684
133.789	0.0139321	224.451	0.00321474	163.606	0.00730697	411.042	0.000273598			181.859	0.00566834	337.998	0.00132263	246.085	0.000618175
135.954	0.0111714	230.093	0.0022923	167.662	0.00785607	494.197	0.000273598			191.215	0.00365113	354.742	0.000817842	261.432	0.000544211
140.237	0.00831113	236.114	0.000695927	174.719	0.00544739					207.515	0.00330218	363.976	0.000853169	270.21	0.000751602
148.97	0.00676861	245.259	0.00114957	182.127	0.00534738					225.127	0.00225603	372.297	0.000828147	281.915	0.000354428
156.995	0.00644059	253.636	0.00095297	187.404	0.0025077					243.605	0.00163504	482.028	0.000411538	300.169	0.000496624
162.908	0.0046906	261.559	0.000938011	193.696	0.00264928					254.873	0.00116863			334.648	0.000506463
168.96	0.00398409	273.173	0.000867302	198.034	0.00454875					264.786	0.00106874			359.662	0.000376616
176.46	0.0033626	281.576	0.00135604	204.169	0.0037569					272.483	0.000353696			377.239	0.000518619
181.593	0.00216988	290.028	0.00049373	207.7	0.00483834					281.17	0.000361896			394.817	0.000523635
189.709	0.00203008	298.015	0.00131145	216.224	0.00454703					289.887	0.000344225			424.563	0.000395138
198.251	0.000724585	313.69	0.000637469	220.689	0.00370428					295.437	0.00159116			445.521	0.000401119
206.8	0.000967354	329.474	0.000834994	223.42	0.00120929					304.408	0.000108599			470.535	0.000545244
215.351	0.0014974	361.135	0.000679636	231.82	0.00109265					321.355	0.000282826			495.549	0.00027841
223.898	0.00113765	369.659	0.000687944	243.516	0.000715992					331.268	0.00105344
232.445	0.000920256	377.371	0.000729311	252.508	0.000880367					339.767	0.00016046
240.992	0.000667275	386.707	0.000853389	258.254	0.00185452					347.547	0.000205609
249.545	0.00170579	394.42	0.000722772	265.339	0.00157661					356.264	0.000198108
258.089	0.000779093	406.191	0.000696411	272.759	0.00150986					364.788	0.000198476
266.636	0.000531197	411.671	0.00064706	299.055	0.000349327					373.312	0.000194713
275.186	0.000946843			307.23	0.00105317					381.836	0.000280409
283.733	0.000726912			321.761	0.00110314					390.36	0.000199523
292.281	0.000629011			327.038	0.00103689					397.521	0.000661393
300.83	0.000709072			341.245	0.000840415					407.409	0.00021541
309.377	0.00060863			349.526	0.000686898					415.933	0.000168407
317.927	0.000950548			356.873	0.000761647					424.457	0.00017531
326.478	0.00130264			380.619	0.000994607					432.981	0.000273179
335.025	0.00120982			401.726	0.000630513					441.505	0.000193809
343.57	0.00052719			413.092	0.000633757					450.03	0.000169086
352.118	0.000503016			438.867	0.000700229					458.554	0.0002032
360.666	0.00050935			460.947	0.000677716					467.078	0.00021921
369.215	0.000523311			469.108	0.000718284					475.602	0.000240649
377.763	0.000532188			475.602	0.000700198					484.228	0.000256571
386.311	0.000533438									492.65	0.00018125
394.86	0.000534687									499.551	8.11767e-05
403.408	0.000541021
411.956	0.000588033
420.505	0.000607078
429.053	0.000585447
437.601	0.000566358
446.149	0.000572693
454.697	0.000579027
463.246	0.000592988
471.795	0.000851011
480.343	0.000646333
488.891	0.000604364
496.828	0.000589483

## Sheet: Fig10-supp1B-NTA
	repeat 1		repeat 2		repeat 3				Values reconstructed from plotted curves due to unavailability of original files.
size(nm)	fraction	size(nm)	fraction	size(nm)	fraction
4.89498	0.000225387	14.1972	0.000273598	6.76056	0.000273598
13.4442	0.000414768	18.2535	0.00109439	13.5211	0.000410397
21.9968	0.00123973	27.7183	0.000410397	20.2817	0.00164159
30.5485	0.0019096	36.507	0.00177839	27.0423	0.00355677
38.1496	0.00241924	41.9155	0.00205198	35.831	0.00300958
41.22	0.00500221	48	0.00465116	39.2113	0.00588235
43.771	0.00767851	50.7042	0.00766074	43.2676	0.00916553
45.5416	0.0105353	52.0563	0.0106703	44.6197	0.0125855
47.4476	0.0133624	52.7324	0.0139535	46.6479	0.0166895
48.5326	0.0160038	53.4085	0.0176471	48.6761	0.0207934
49.8344	0.0184549	55.4366	0.0261286	50.0282	0.0246238
51.1602	0.0211608	58.1408	0.0316005	52.0563	0.0291382
52.1474	0.0239911	60.8451	0.0366621	52.7324	0.0335157
53.3457	0.0271022	62.1972	0.0429549	54.0845	0.0377565
54.6321	0.0303909	64.9014	0.0477428	55.4366	0.0421341
55.6698	0.0332455	68.2817	0.0528044	56.7887	0.0466484
56.3415	0.0355379	70.9859	0.0584131	58.1408	0.0508892
57.2198	0.0380457	74.3662	0.0632011	59.493	0.0549932
57.9814	0.0407899	77.0704	0.0685363	60.8451	0.0599179
58.6483	0.0433775	79.0986	0.0738714	61.5211	0.0640219
59.6068	0.0457951	81.8028	0.0778386	62.8732	0.0681259
60.5294	0.0484877	84.507	0.0807114	64.2254	0.0723666
61.7455	0.0518588	88.5634	0.0772914	64.9014	0.0777018
62.7792	0.0549353	90.5915	0.073461	67.6056	0.0822161
63.886	0.0573878	91.9437	0.0697674	70.9859	0.0860465
64.942	0.0598765	93.9718	0.0675787	74.3662	0.0906977
66.0609	0.0623709	98.0282	0.0655267	77.7465	0.0948016
67.492	0.0651077	100.056	0.0608755	81.8028	0.0908345
67.9886	0.0677503	100.732	0.0570451	83.831	0.0871409
69.4006	0.0710458	102.761	0.0533516	83.831	0.0841313
70.6189	0.0751715	109.521	0.049658	85.1831	0.0819425
71.6543	0.0785724	110.197	0.0445964	85.8592	0.078249
72.3922	0.0813095	111.549	0.0404925	85.1831	0.073461
73.0181	0.0842463	112.901	0.0365253	87.2113	0.0699042
75.7706	0.0873497	116.958	0.0354309	89.2394	0.0658003
77.2819	0.0900111	121.69	0.0393981	91.2676	0.0625171
78.5096	0.0921815	127.099	0.0326949	96	0.0615595
82.6144	0.085227	131.831	0.0280438	99.3803	0.0581395
83.6811	0.0821331	135.211	0.024487	102.085	0.0533516
82.4943	0.088732	139.268	0.0214774	105.465	0.0470588
84.9923	0.0798846	143.324	0.0222982	106.817	0.0424077
87.4262	0.0773295	148.056	0.0186047	108.845	0.0377565
90.6985	0.0747978	150.761	0.0142271	110.197	0.0346101
93.0021	0.0721604	153.465	0.0125855	113.577	0.0307798
94.5291	0.0694366	158.873	0.0134063	114.93	0.0269494
95.8546	0.0669986	164.282	0.00984952	116.958	0.023119
96.5897	0.0645322	170.366	0.00725034	118.986	0.0188782
98.2653	0.061837	174.423	0.00834473	123.718	0.0162791
99.64	0.0591365	176.451	0.00930233	130.479	0.0177839
101.345	0.0564846	180.507	0.00588235	136.563	0.0135431
102.773	0.0537536	183.887	0.00164159	139.944	0.0102599
103.516	0.051061	189.972	0.00287278	148.056	0.00834473
104.515	0.0475949	196.056	0.00437756	154.141	0.00601915
105.208	0.0444152	203.493	0.00259918	161.577	0.00355677
105.791	0.0416934	206.197	0.00177839	166.31	0.00287278
106.229	0.0386844	210.93	0.00369357	171.718	0.00519836
107.316	0.0356665	213.634	0.00533516	177.127	0.00246238
110.587	0.0330175	217.69	0.00328317	181.183	0.00150479
116.23	0.0329096	223.099	0.000683995	189.972	0.00232558
117.355	0.0303517	230.535	0.00177839	196.732	0.00191518
119.424	0.0280314	240.676	0.000683995	208.225	0.00109439
121.778	0.0257785	247.437	0.00273598	215.662	0.00150479
123.877	0.0232877	254.873	0.000683995	221.07	0.000136799
125.193	0.0207149	264.338	0.000957592	228.507	0.00136799
126.43	0.0185875	271.775	0.000410397	250.141	0.000273598
129.539	0.0162295	277.183	0.00150479	340.732	0.000410397
133.789	0.0139321	283.944	0.000683995	411.042	0.000273598
135.954	0.0111714	287.324	0.000136799	494.197	0.000273598
140.237	0.00831113	298.817	0.000136799
148.97	0.00676861	315.042	0.000957592
156.995	0.00644059	323.155	0
162.908	0.0046906	392.113	0.000273598
168.96	0.00398409	401.577	0.000683995
176.46	0.0033626	411.042	0.000136799
181.593	0.00216988	423.211	0
189.709	0.00203008	432	0.000683995
198.251	0.000724585	440.789	0.000273598
206.8	0.000967354	496.225	0.000273598
215.351	0.0014974
223.898	0.00113765
232.445	0.000920256
240.992	0.000667275
249.545	0.00170579
258.089	0.000779093
266.636	0.000531197
275.186	0.000946843
283.733	0.000726912
292.281	0.000629011
300.83	0.000709072
309.377	0.00060863
317.927	0.000950548
326.478	0.00130264
335.025	0.00120982
343.57	0.00052719
352.118	0.000503016
360.666	0.00050935
369.215	0.000523311
377.763	0.000532188
386.311	0.000533438
394.86	0.000534687
403.408	0.000541021
411.956	0.000588033
420.505	0.000607078
429.053	0.000585447
437.601	0.000566358
446.149	0.000572693
454.697	0.000579027
463.246	0.000592988
471.795	0.000851011
480.343	0.000646333
488.891	0.000604364
496.828	0.000589483

## Sheet: Fig10-supp1C-NTA
	repeate 1		repeate 2		repeate 3		repeate 4			Values reconstructed from plotted curves due to unavailability of original files.
size(nm)	Fraction	size(nm)	Fraction	size(nm)	Fraction	size(nm)	Fraction
8.78873	0.000273598	13.5211	0.000136799	14.1972	0.000273598	6.76056	0.000273598
16.9014	0.000136799	18.9296	0.000410397	18.2535	0.00109439	13.5211	0.000410397
23.662	0.000820793	25.0141	0.000547196	27.7183	0.000410397	20.2817	0.00164159
29.0704	0.000136799	28.3944	0.00123119	36.507	0.00177839	27.0423	0.00355677
33.8028	0.000820793	35.831	0.000273598	41.9155	0.00205198	35.831	0.00300958
39.8873	0.000136799	39.8873	0.00328317	48	0.00465116	39.2113	0.00588235
45.9718	0.00287278	42.5915	0.00629275	50.7042	0.00766074	43.2676	0.00916553
47.3239	0.00615595	47.3239	0.0106703	52.0563	0.0106703	44.6197	0.0125855
50.0282	0.00998632	49.3521	0.0142271	52.7324	0.0139535	46.6479	0.0166895
52.7324	0.0146375	51.3803	0.0183311	55.4366	0.0261286	48.6761	0.0207934
56.1127	0.0187415	53.4085	0.0227086	58.1408	0.0316005	50.0282	0.0246238
58.8169	0.022435	55.4366	0.0268126	60.8451	0.0366621	52.0563	0.0291382
60.8451	0.025855	56.7887	0.0310534	62.1972	0.0429549	52.7324	0.0335157
62.1972	0.0300958	58.8169	0.0358413	64.9014	0.0477428	54.0845	0.0377565
64.2254	0.0339261	59.493	0.0393981	68.2817	0.0528044	55.4366	0.0421341
65.5775	0.0374829	60.8451	0.0435021	70.9859	0.0584131	56.7887	0.0466484
66.9296	0.0410397	62.1972	0.0477428	74.3662	0.0632011	58.1408	0.0508892
68.9577	0.0452804	62.8732	0.052394	77.0704	0.0685363	59.493	0.0549932
71.662	0.048974	64.9014	0.0580027	79.0986	0.0738714	60.8451	0.0599179
73.0141	0.0528044	66.9296	0.0681259	81.8028	0.0778386	61.5211	0.0640219
75.0423	0.0569083	68.9577	0.072777	84.507	0.0807114	62.8732	0.0681259
75.7183	0.0607387	71.662	0.0785226	88.5634	0.0772914	64.2254	0.0723666
77.0704	0.0648427	74.3662	0.0830369	90.5915	0.073461	64.9014	0.0777018
78.4225	0.0681259	76.3944	0.0874145	91.9437	0.0697674	67.6056	0.0822161
80.4507	0.0722298	81.1268	0.0852257	93.9718	0.0675787	70.9859	0.0860465
83.1549	0.0745554	85.1831	0.0812585	98.0282	0.0655267	74.3662	0.0906977
88.5634	0.0744186	90.5915	0.0842681	100.056	0.0608755	77.7465	0.0948016
91.9437	0.0797538	95.3239	0.0807114	100.732	0.0570451	81.8028	0.0908345
97.3521	0.0753762	96.6761	0.0723666	102.761	0.0533516	83.831	0.0871409
102.085	0.0726402	98.0282	0.0677155	109.521	0.049658	83.831	0.0841313
104.113	0.0690834	100.056	0.0630643	111.549	0.0404925	85.1831	0.0819425
105.465	0.0658003	102.085	0.0582763	112.901	0.0365253	85.8592	0.078249
106.817	0.0616963	104.789	0.0532148	116.958	0.0354309	85.1831	0.073461
108.169	0.0570451	107.493	0.0488372	121.69	0.0393981	87.2113	0.0699042
110.873	0.0529412	110.873	0.0447332	127.099	0.0326949	89.2394	0.0658003
113.577	0.0477428	113.577	0.0402189	131.831	0.0280438	91.2676	0.0625171
116.282	0.0436389	115.606	0.0354309	135.211	0.024487	96	0.0615595
118.31	0.0409029	117.634	0.030643	139.268	0.0214774	99.3803	0.0581395
123.718	0.0409029	119.662	0.0270862	143.324	0.0222982	102.085	0.0533516
127.099	0.0346101	124.394	0.0268126	148.056	0.0186047	105.465	0.0470588
131.831	0.0290014	129.127	0.0221614	150.761	0.0142271	106.817	0.0424077
133.859	0.0240766	135.211	0.0177839	153.465	0.0125855	108.845	0.0377565
135.211	0.0198358	139.268	0.0135431	158.873	0.0134063	110.197	0.0346101
139.944	0.0177839	144	0.0109439	164.282	0.00984952	113.577	0.0307798
145.352	0.0187415	149.408	0.0102599	170.366	0.00725034	114.93	0.0269494
152.789	0.0123119	153.465	0.00588235	174.423	0.00834473	116.958	0.023119
156.845	0.00902873	158.873	0.00341997	176.451	0.00930233	118.986	0.0188782
163.606	0.00807114	172.394	0.00383037	180.507	0.00588235	123.718	0.0162791
170.366	0.00725034	179.155	0.00287278	183.887	0.00164159	130.479	0.0177839
175.775	0.00369357	186.592	0.00164159	189.972	0.00287278	136.563	0.0135431
181.183	0.00396717	192.676	0.00218878	196.056	0.00437756	139.944	0.0102599
188.62	0.00218878	198.085	0.00150479	203.493	0.00259918	148.056	0.00834473
195.38	0.00410397	203.493	0.00177839	206.197	0.00177839	154.141	0.00601915
202.141	0.00287278	210.93	0.00123119	210.93	0.00369357	161.577	0.00355677
206.873	0.00410397	219.718	0.00232558	213.634	0.00533516	166.31	0.00287278
212.282	0.00259918	228.507	0.000410397	217.69	0.00328317	171.718	0.00519836
217.014	0.00136799	238.648	0.000273598	223.099	0.000683995	177.127	0.00246238
223.775	0.00164159	248.113	0.00109439	230.535	0.00177839	181.183	0.00150479
230.535	0.00123119	253.521	0.000547196	240.676	0.000683995	189.972	0.00232558
235.944	0.000820793	260.958	0.000273598	247.437	0.00273598	196.732	0.00191518
242.028	0.000273598	257.577	0.000957592	254.873	0.000683995	208.225	0.00109439
246.761	0.00136799	280.563	0.000136799	264.338	0.000957592	215.662	0.00150479
251.493	0.000683995	288.676	0.000820793	271.775	0.000410397	221.07	0.000136799
253.521	0.000273598	298.817	0.000273598	277.183	0.00150479	228.507	0.00136799
258.254	0.00109439	309.634	-0.000136799	283.944	0.000683995	250.141	0.000273598
262.31	0.00177839	317.07	0.000547196	287.324	0.000136799	340.732	0.000410397
268.394	0.000683995	326.535	0.000136799	298.817	0.000136799	411.042	0.000273598
272.451	0.000410397	348.845	0.000136799	315.042	0.000957592	494.197	0.000273598
276.507	0.000683995	356.958	0.000820793	323.155	0
281.239	0.000957592	362.366	0.000136799	392.113	0.000273598
287.324	0.000136799	463.775	0.000136799	401.577	0.000683995
296.789	0.000683995	471.887	0.000683995	411.042	0.000136799
302.197	0.000273598	474.592	0.000410397	423.211	0
317.746	0.000136799	488.113	0.000273598	432	0.000683995
327.211	0.000683995			440.789	0.000273598
332.62	0.000136799			496.225	0.000273598
348.845	0.000273598
352.225	0.000683995
356.958	0.000136799
459.718	0.000273598
471.211	0.000683995
476.62	0.000273598
497.577	0.000273598
