# Supplementary material for: Isolation of small extracellular vesicles from small volumes of blood plasma using size exclusion chromatography and density gradient ultracentrifugation
Source: eLife. 2026 May 22;13:RP92796. doi: 10.7554/eLife.92796 (PMC13197162; doi:10.7554/eLife.92796)
Supplement: Figure 10—figure supplement 2—source data 1. [file elife-92796-fig10-figsupp2-data1.xlsx]

## Sheet: ReadMe
Source data for Figure 10–figure supplement 2.
This file contains numerical data corresponding to the particle size distributions shown in Figure 10–figure supplement 2.
The data represent particle size distributions of SEC-DGUC-1 measured by nanoparticle tracking analysis (NTA) from repeatability experiments. The distributions correspond to the experiment presented in this figure and include multiple measurement repeats.

## Sheet: Fig10-supp2-NTA
	repeat 1		repeat 2		repeat 3			Values reconstructed from plotted curves due to unavailability of original files.
size (nm)	fraction	size (nm)	fraction	size (nm)	fraction
7.88777	0.000121034	35.3514	0.000435748	34.7374	0.000199336
21.4912	0.000160683	44.5771	0.00201235	44.4159	0.00268194
35.0862	0.00101809	46.7042	0.00512673	47.0252	0.00540852
46.4845	0.00287727	54.7149	0.00725639	51.6996	0.00755363
50.944	0.00515872	58.6386	0.00995897	54.7497	0.0101577
53.5712	0.007784	60.4863	0.0129471	56.3409	0.0128992
55.5417	0.010451	61.883	0.0157041	57.4559	0.0178323
56.3426	0.0127361	63.4108	0.0183061	58.3872	0.0154752
57.6149	0.0149837	70.1275	0.0216081	60.2042	0.0208698
58.8877	0.0171884	74.1993	0.0243219	60.5216	0.0236362
60.6303	0.0195297	75.6216	0.0277322	61.302	0.0264703
61.9476	0.0219864	76.6036	0.030897	62.6551	0.0287452
64.5414	0.0246229	79.6559	0.0356811	64.9037	0.0305526
65.5874	0.0270799	87.1289	0.0328904	66.1751	0.032891
67.419	0.029346	90.817	0.0361794	67.7637	0.035885
68.8646	0.0319271	95.1141	0.0405648	71.5502	0.0396678
69.7249	0.0341625	100.751	0.0353821	74.0058	0.0421595
71.7505	0.0366556	105.836	0.0314487	80.2495	0.0382724
77.1965	0.0388544	114.439	0.031495	84.182	0.0456216
82.3528	0.0417996	122.529	0.0290033	89.4362	0.0497342
83.9035	0.0448505	128.084	0.0316944	95.6644	0.0473422
91.9619	0.0454485	130.34	0.0277061	99.758	0.0456879
95.8566	0.044253	131.206	0.0298007	102.019	0.0434888
96.9424	0.0410464	135.473	0.0247837	104.415	0.0409635
104.042	0.0379915	143.597	0.0312957	106.32	0.0367774
106.92	0.0386711	147.401	0.0274893	108.205	0.0343854
110.414	0.0355335	149.257	0.0238206	115.587	0.0404651
112.566	0.0325914	151.783	0.0195349	119.34	0.0374751
116.007	0.031316	154.113	0.0173902	121.224	0.0351827
122.448	0.0368771	161.693	0.0210299	121.255	0.0321927
123.598	0.0357133	165.994	0.0250166	130.295	0.0306778
127.031	0.033002	171.623	0.0206312	131.439	0.0278925
133.096	0.0308975	179.641	0.02319	135.529	0.02467
141.688	0.0286411	184.03	0.0206312	140.552	0.025814
143.001	0.0269238	186.739	0.0173765	141.023	0.0302908
144.72	0.023579	192.144	0.0148202	145.96	0.0227051
147.423	0.0212292	200.825	0.0162458	148.995	0.0204954
151.754	0.0223256	206.419	0.0151495	157.947	0.0224786
156.794	0.0191063	212.609	0.0164452	163.576	0.0189369
159.306	0.0163158	218.224	0.0133555	167.947	0.0161462
167.099	0.0144313	222.555	0.0144518	173.517	0.0174419
172.948	0.0124585	227.086	0.0109572	179.113	0.0161462
180.994	0.0142525	233.166	0.00817276	183.45	0.0167442
186.595	0.0125581	241.214	0.00976744	185.952	0.0147508
188.467	0.0135309	249.919	0.00787375	189.078	0.0123588
194.609	0.0174419	253.63	0.00887043	191.713	0.010494
200.452	0.0129012	263.534	0.0109635	197.177	0.00906977
205.857	0.00946844	268.346	0.00866839	200.765	0.0164119
211.428	0.0106645	271.367	0.00678023	202.789	0.00627907
219.303	0.00903006	277.654	0.00430618	208.967	0.0086711
226.342	0.00817276	288.429	0.00318937	218.563	0.00902194
233.168	0.00797342	296.506	0.00189369	233.537	0.00908128
239.387	0.00647841	305.788	0.00418605	237.481	0.0108638
246.041	0.00747929	317.59	0.00269103	250.549	0.00687708
252.395	0.00837209	323.779	0.00408638	253.678	0.00428571
261.711	0.00727575	330.235	0.00162591	259.865	0.0058804
266.775	0.00569883	338.911	0.00054974	266.71	0.00378738
276.612	0.00607973	351.859	0.00132864	276.642	0.00318937
278.659	0.00507051	368.362	0.00118073	282.028	0.00563586
286.787	0.00313906	375.306	0.000398671	289.658	0.00428571
293.396	0.00269103	383.974	0.00199336	298.491	0.00340767
298.352	0.0033887	396.398	0.000398671	312.941	0.00221839
303.321	0.0027907	405.071	0.00149502	318.228	0.000996678
310.134	0.00388704	413.148	0.000299003	325.665	0.00169435
313.624	0.00267592	432.976	0.000109635	330.019	0.000598007
318.847	0.00109635	447.448	0.000766199	339.315	0.00149502
327.239	0.00166983	471.331	0.000328608	351.897	0.000172705
333.731	0.00149502			363.512	0.00109635
340.84	0.00193994			372.207	9.96678e-05
347.996	0.00179402			391.437	0.000199336
354.443	0.00201923			406.323	0.000398671
362.891	0.00119601			419.346	0.00089701
368.462	0.00239203			426.795	0.000398671
373.436	0.00129568			495.036	9.96678e-05
377.774	0.00169435
381.662	0.000896669
385.233	0.000299003
395.271	0.000415924
408.876	0.000319279
422.481	0.000225113
431.754	0.000797342
436.082	0.000440705
442.307	9.96678e-05
449.689	0.000175551
463.293	0.00019042
476.895	0.000316801
490.501	7.14723e-05
498.923	2.98407e-05
