# Supplementary material for: Isolation of small extracellular vesicles from small volumes of blood plasma using size exclusion chromatography and density gradient ultracentrifugation
Source: eLife. 2026 May 22;13:RP92796. doi: 10.7554/eLife.92796 (PMC13197162; doi:10.7554/eLife.92796)
Supplement: Figure 10—source data 1. [file elife-92796-fig10-data1.xlsx]

## Sheet: ReadMe
Source data for Figure 10.
This file contains numerical data corresponding to panels 10A and 10B in Figure 10.
The data represent repeatability of the SEC-DGUC protocol across four technical replicates.
Panel 10A shows particle concentration profiles measured by nanoparticle tracking analysis (NTA) along the length of the collection tube.
Panel 10B shows particle size distributions measured by NTA for selected fractions (SEC-DGUC-1 to SEC-DGUC-4).
Sheet descriptions:
Figure10A-vesicle conc profile: Particle concentration values across positions/fractions along the tube for four technical replicates
Figure10B-SEC-DGUC-1: Particle size distributions for SEC-DGUC-1 across four technical replicates
Figure10B-SEC-DGUC-2: Particle size distributions for SEC-DGUC-2 across four technical replicates
Figure10B-SEC-DGUC-3: Particle size distributions for SEC-DGUC-3 across four technical replicates
Figure10B-SEC-DGUC-4: Particle size distributions for SEC-DGUC-4 across four technical replicates

## Sheet: Figure 10A-vesicle conc profile
Repeat 1	concentration (mL^-1)	Repeat 2	concentration (mL^-1)	Repeat 3	concentration (mL^-1)	Repeat 4	concentration (mL^-1)
f1	5200000000	f1	3100000000	f1	3800000000	f1	3400000000
f2	2400000000	f2	690000000	f2	1000000000	f2	1000000000
f3	1000000000	f3	1600000000	f3	850000000	f3	1300000000
f4	1500000000	f4	2400000000	f4	1400000000	f4	1600000000
f5	1800000000	f5	6100000000	f5	3000000000	f5	2100000000
f6	4200000000	f6	5700000000	f6	4000000000	f6	3400000000
f7	7700000000	f7	18000000000	f7	11000000000	f7	7600000000
f8	19000000000	f8	38000000000	f8	28000000000	f8	25000000000
f9	51000000000	f9	59000000000	f9	52000000000	f9	77000000000
f10	110000000000	f10	85000000000	f10	90000000000	f10	110000000000
f11	110000000000	f11	180000000000	f11	170000000000	f11	160000000000
f12	300000000000	f12	170000000000	f12	160000000000	f12	270000000000
f13	560000000000	f13	300000000000	f13	410000000000	f13	370000000000

## Sheet: Figure 10B-SEC-DGUC-1
	repeat 1	repeat 2	repeat 3	repeat 4
Size / nm	fraction	fraction	fraction	fraction
2.5	0	0	0	0
7.5	0.00118343	0	0	0
12.5	0	0	0.00104493	0.00151515
17.5	0	0	0	0
22.5	0	0	0	0
27.5	0	0.00176056	0.00104493	0
32.5	0	0.00176056	0.00104493	0
37.5	0.00236686	0.00176056	0.0031348	0
42.5	0.0035503	0	0.00208986	0.0030303
47.5	0.0118343	0.00704225	0.00522466	0.00151515
52.5	0.0307692	0.00528169	0.014629	0.00151515
57.5	0.0248521	0.0123239	0.015674	0.0136364
62.5	0.0402367	0.0158451	0.0250784	0.0151515
67.5	0.0485207	0.0264085	0.0323929	0.0257576
72.5	0.0426036	0.0246479	0.0355277	0.0181818
77.5	0.0497041	0.0457746	0.0376176	0.0363636
82.5	0.0508876	0.0369718	0.0522466	0.0348485
87.5	0.0544379	0.0457746	0.0491118	0.0469697
92.5	0.0461538	0.0369718	0.045977	0.05
97.5	0.0473373	0.0352113	0.0480669	0.0363636
102.5	0.0426036	0.0440141	0.0428422	0.0378788
107.5	0.035503	0.0528169	0.0543365	0.0363636
112.5	0.0366864	0.0387324	0.0470219	0.0424242
117.5	0.043787	0.0316901	0.0428422	0.0454545
122.5	0.0236686	0.0246479	0.0376176	0.0454545
127.5	0.0284024	0.0369718	0.0376176	0.0424242
132.5	0.0201183	0.0510563	0.030303	0.0348485
137.5	0.0236686	0.0369718	0.0250784	0.0363636
142.5	0.0272189	0.0176056	0.0219436	0.0242424
147.5	0.0213018	0.0264085	0.0250784	0.030303
152.5	0.0284024	0.0334507	0.0240334	0.030303
157.5	0.035503	0.0334507	0.0282132	0.0333333
162.5	0.00828402	0.0193662	0.0177638	0.0227273
167.5	0.0189349	0.0264085	0.0177638	0.0227273
172.5	0.0118343	0.0105634	0.00835946	0.0151515
177.5	0.0130178	0.0176056	0.0135841	0.0121212
182.5	0.016568	0.0123239	0.0167189	0.0121212
187.5	0.0142012	0.0105634	0.0135841	0.0181818
192.5	0.0118343	0.0123239	0.0114943	0.0166667
197.5	0.00473373	0.0123239	0.0167189	0.0106061
202.5	0.00946746	0.0140845	0.00731452	0.0166667
207.5	0.0106509	0.0105634	0.00417973	0.00757576
212.5	0.00828402	0.0105634	0.00731452	0.00909091
217.5	0.00236686	0.0105634	0.0114943	0.0106061
222.5	0.00473373	0.0193662	0.0031348	0.0030303
227.5	0	0.0105634	0.00522466	0.0106061
232.5	0.00473373	0.00704225	0.0031348	0.0106061
237.5	0.00591716	0.00528169	0.00835946	0.00909091
242.5	0.0035503	0.00528169	0.00417973	0.00606061
247.5	0	0.00176056	0.00208986	0.00454545
252.5	0.0035503	0.00528169	0.00417973	0.0030303
257.5	0.00473373	0.00352113	0.00104493	0.00757576
262.5	0.00118343	0.00176056	0.00208986	0.00909091
267.5	0.00236686	0.00352113	0.00208986	0.00454545
272.5	0	0.00528169	0.00417973	0.0030303
277.5	0	0.00704225	0.00208986	0
282.5	0.00236686	0.00176056	0.00104493	0.00151515
287.5	0.0035503	0.00352113	0.00208986	0
292.5	0.00118343	0.00176056	0.00104493	0.0030303
297.5	0	0.00176056	0.00208986	0.0030303
302.5	0.00236686	0.00528169	0.00522466	0.0030303
307.5	0	0	0.00104493	0.00151515
312.5	0	0	0	0.0030303
317.5	0	0	0	0.00151515
322.5	0	0	0.00208986	0.00151515
327.5	0	0.00176056	0.00104493	0
332.5	0	0.00176056	0	0.00151515
337.5	0.00236686	0.00176056	0.00208986	0.00151515
342.5	0	0	0.00104493	0
347.5	0.00236686	0	0.00208986	0.00151515
352.5	0	0	0	0.00151515
357.5	0	0	0	0
362.5	0	0	0.00208986	0.00151515
367.5	0	0	0	0.00151515
372.5	0	0.00352113	0	0
377.5	0	0	0	0
382.5	0	0.00176056	0	0
387.5	0.00118343	0.00176056	0	0
392.5	0	0	0	0
397.5	0	0	0.00104493	0
402.5	0	0.00176056	0	0
407.5	0	0	0	0
412.5	0	0	0	0
417.5	0.00118343	0.00176056	0	0
422.5	0	0	0	0
427.5	0	0	0	0
432.5	0	0	0	0
437.5	0	0	0	0
442.5	0	0	0	0
447.5	0	0	0	0.00151515
452.5	0	0	0	0
457.5	0	0	0	0
462.5	0	0	0	0
467.5	0	0.00176056	0	0
472.5	0	0	0	0
477.5	0	0	0	0.00151515
482.5	0	0	0	0
487.5	0	0	0	0
492.5	0	0	0	0
497.5	0.00118343	0	0.00104493	0

## Sheet: Figure 10B-SEC-DGUC-2
	repeat 1	repeat 2	repeat 3	repeat 4
Size / nm	fraction	fraction	fraction	fraction
2.5	0	0	0	0
7.5	0	0	0	0
12.5	0.00107028	0	0.000892459	0
17.5	0.0017838	0	0	0
22.5	0.00142704	0.00161616	0	0.000703235
27.5	0.00107028	0.00121212	0.00223115	0.00140647
32.5	0.00249732	0.00323232	0.00223115	0.00175809
37.5	0.00570817	0.00484848	0.00490852	0.00386779
42.5	0.0146272	0.00888889	0.0111557	0.00984529
47.5	0.0296111	0.0189899	0.021419	0.0253165
52.5	0.0574385	0.0367677	0.0535475	0.0453586
57.5	0.0681413	0.060202	0.0705042	0.0639944
62.5	0.0931145	0.0686869	0.0901383	0.0949367
67.5	0.10025	0.0844444	0.0923695	0.0886076
72.5	0.108455	0.0787879	0.0990629	0.0889592
77.5	0.093828	0.0836364	0.0821062	0.0794655
82.5	0.0770603	0.0670707	0.0731816	0.0703235
87.5	0.0652872	0.0630303	0.0575636	0.0604782
92.5	0.0531573	0.0464646	0.048639	0.0436006
97.5	0.0445951	0.0420202	0.0365908	0.0474684
102.5	0.0313949	0.0323232	0.0348059	0.0348101
107.5	0.0224759	0.0351515	0.0294511	0.0298875
112.5	0.023903	0.029899	0.0196341	0.0140647
117.5	0.0117731	0.0206061	0.0147256	0.019339
122.5	0.0128434	0.0129293	0.0178492	0.0130098
127.5	0.00820549	0.019798	0.0178492	0.0147679
132.5	0.00820549	0.0230303	0.0169567	0.0116034
137.5	0.00713521	0.0113131	0.0075859	0.0116034
142.5	0.00321085	0.0117172	0.011602	0.00879044
147.5	0.00428113	0.00929293	0.00892459	0.0101969
152.5	0.00428113	0.0129293	0.00580098	0.0116034
157.5	0.00356761	0.0141414	0.00624721	0.00949367
162.5	0.00463789	0.00606061	0.00669344	0.00949367
167.5	0.00142704	0.00727273	0.00490852	0.00527426
172.5	0.0017838	0.00565657	0.00401606	0.00738397
177.5	0.00249732	0.00686869	0.00490852	0.00421941
182.5	0.00249732	0.00444444	0.00178492	0.0080872
187.5	0.00321085	0.00363636	0.00713967	0.00668073
192.5	0.00214056	0.00646465	0.00446229	0.00351617
197.5	0.00214056	0.00525253	0.00267738	0.00175809
202.5	0.00321085	0.00565657	0.00178492	0.00316456
207.5	0.00142704	0.00444444	0.00133869	0.00351617
212.5	0.00142704	0.0040404	0.00223115	0.0021097
217.5	0.00142704	0.0040404	0.00178492	0.00246132
222.5	0.000713521	0.00646465	0.00178492	0.00246132
227.5	0.00142704	0.00282828	0.00178492	0.00105485
232.5	0.000356761	0.00282828	0.000892459	0.00140647
237.5	0.000713521	0.00242424	0.00223115	0.00246132
242.5	0.000713521	0.00161616	0	0.00140647
247.5	0.000356761	0.00040404	0.00178492	0.00175809
252.5	0.000356761	0.0020202	0.00178492	0.00175809
257.5	0	0.00161616	0.000892459	0.00175809
262.5	0.000356761	0.00040404	0.00133869	0.00175809
267.5	0	0.000808081	0.000892459	0
272.5	0.000713521	0.00121212	0	0.00140647
277.5	0	0.0020202	0.000892459	0.00175809
282.5	0.000713521	0.000808081	0.000446229	0.000351617
287.5	0	0.00121212	0.000892459	0.000703235
292.5	0.000356761	0.00040404	0.000446229	0.000703235
297.5	0.000713521	0.00040404	0.000446229	0.000351617
302.5	0.000356761	0.00121212	0	0.000351617
307.5	0	0	0	0.00105485
312.5	0	0	0.000446229	0
317.5	0	0	0	0
322.5	0.000356761	0	0	0.00105485
327.5	0	0.00040404	0	0.000351617
332.5	0	0.00040404	0	0
337.5	0	0.00040404	0	0
342.5	0	0	0	0.00140647
347.5	0.000356761	0	0	0
352.5	0	0	0	0.000351617
357.5	0.000356761	0	0	0.000703235
362.5	0	0	0	0.000351617
367.5	0	0	0	0
372.5	0.000356761	0.000808081	0	0
377.5	0.000356761	0	0.000446229	0.000351617
382.5	0.000356761	0.00040404	0.000446229	0
387.5	0	0.00040404	0	0
392.5	0	0	0	0
397.5	0	0	0.000446229	0
402.5	0	0.00040404	0	0
407.5	0	0	0	0
412.5	0	0	0	0
417.5	0	0.00040404	0	0
422.5	0	0	0	0
427.5	0.000356761	0	0	0
432.5	0	0	0	0
437.5	0	0	0	0
442.5	0	0.00040404	0	0
447.5	0.000356761	0	0	0
452.5	0.000713521	0	0	0
457.5	0	0	0	0
462.5	0	0	0	0
467.5	0	0.00040404	0	0
472.5	0.000356761	0	0	0
477.5	0	0	0	0
482.5	0	0	0	0
487.5	0	0	0	0
492.5	0	0	0	0
	0	0	0	0

## Sheet: Figure 10B-SEC-DGUC-3
	repeat 1	repeat 2	repeat 3	repeat 4
Size / nm	fraction	fraction	fraction	fraction
2.5	0	0	0	0
7.5	0.000154536	0.000124332	0	0
12.5	0.000772678	0.000870322	0.00060818	0.000979021
17.5	0.000927214	0.00149198	0.00136841	0.00195804
22.5	0.00231803	0.00248663	0.00136841	0.00195804
27.5	0.00169989	0.00211364	0.00212863	0.00167832
32.5	0.00278164	0.00422728	0.0030409	0.0034965
37.5	0.00633596	0.00708691	0.00668998	0.00825175
42.5	0.015299	0.0161631	0.0138361	0.0172028
47.5	0.0338433	0.0346885	0.0325376	0.0355245
52.5	0.0591871	0.0594306	0.0564087	0.0559441
57.5	0.0774223	0.079821	0.0758705	0.0751049
62.5	0.0968938	0.101206	0.0986772	0.0928671
67.5	0.110957	0.110034	0.101414	0.105035
72.5	0.097512	0.109909	0.103391	0.0988811
77.5	0.0958121	0.0901405	0.0983731	0.0976224
82.5	0.0805131	0.07721	0.0819523	0.0765035
87.5	0.0611961	0.0630362	0.064315	0.0620979
92.5	0.052233	0.0460027	0.0498708	0.0462937
97.5	0.0387884	0.0374238	0.0399878	0.0374825
102.5	0.0305981	0.0297153	0.033754	0.0328671
107.5	0.0254984	0.022504	0.0214383	0.0220979
112.5	0.0197806	0.0175308	0.0194618	0.019021
117.5	0.0132901	0.0125575	0.0147484	0.014965
122.5	0.010972	0.0111899	0.00881861	0.00923077
127.5	0.00834492	0.00833023	0.0106432	0.0104895
132.5	0.00602689	0.00571926	0.00729816	0.00853147
137.5	0.00463607	0.00671391	0.00638589	0.00629371
142.5	0.00401793	0.00571926	0.00532158	0.00741259
147.5	0.004327	0.00360562	0.00380113	0.0034965
152.5	0.00401793	0.00372995	0.00395317	0.00531469
157.5	0.00494514	0.00323262	0.00182454	0.00405594
162.5	0.00386339	0.00397861	0.00319295	0.0034965
167.5	0.00154536	0.00186498	0.00228068	0.00377622
172.5	0.00185443	0.00161631	0.00243272	0.00181818
177.5	0.00247257	0.00198931	0.00228068	0.0020979
182.5	0.00169989	0.00198931	0.00106432	0.00237762
187.5	0.00231803	0.00111899	0.00212863	0.00167832
192.5	0.00123628	0.00136765	0.00136841	0.0013986
197.5	0.00108175	0.000621659	0.00212863	0.00181818
202.5	0.00139082	0.00124332	0.00106432	0.00167832
207.5	0.000463607	0.000497327	0.00060818	0.0020979
212.5	0.000463607	0.000124332	0.00136841	0.00153846
217.5	0.000463607	0.00111899	0.00060818	0.00041958
222.5	0.000618142	0.000497327	0.00030409	0.000979021
227.5	0.00154536	0.00074599	0.000760225	0.00125874
232.5	0.000463607	0.00074599	0.000760225	0.000979021
237.5	0.000927214	0.000497327	0.000760225	0.00027972
242.5	0.000154536	0.00074599	0.000760225	0.00111888
247.5	0.000927214	0.000248663	0.000456135	0.00041958
252.5	0.000463607	0.000124332	0.00030409	0.000559441
257.5	0.000463607	0.000124332	0.000152045	0.000979021
262.5	0.000463607	0.000621659	0.000456135	0.00013986
267.5	0.000772678	0.000248663	0.00030409	0.00027972
272.5	0.000309071	0	0.00060818	0.00027972
277.5	0.000463607	0.000248663	0.000456135	0.00027972
282.5	0.000463607	0.000372995	0.000456135	0.00041958
287.5	0.000618142	0	0.000456135	0.00027972
292.5	0	0.000372995	0.000152045	0.000979021
297.5	0	0.000372995	0.000152045	0.00013986
302.5	0	0	0	0.00027972
307.5	0.000154536	0.000621659	0	0
312.5	0	0.000124332	0.000152045	0.00027972
317.5	0	0.000248663	0	0.00027972
322.5	0	0.000248663	0	0.00013986
327.5	0	0.000124332	0.000456135	0.00013986
332.5	0	0	0.000456135	0.00027972
337.5	0	0.000124332	0.000152045	0.00013986
342.5	0.000154536	0.000124332	0.000152045	0.00013986
347.5	0.000154536	0	0.000152045	0.00013986
352.5	0.000154536	0	0	0.00013986
357.5	0	0	0	0
362.5	0	0.000124332	0.000152045	0.00027972
367.5	0.000154536	0.000124332	0.000152045	0.00027972
372.5	0	0	0.000152045	0.00013986
377.5	0	0	0	0.00013986
382.5	0.000154536	0	0.000152045	0
387.5	0	0	0	0.00027972
392.5	0	0	0.000152045	0
397.5	0	0	0	0
402.5	0	0	0	0
407.5	0	0.000124332	0	0.00013986
412.5	0	0	0	0.00027972
417.5	0	0	0	0
422.5	0	0.000124332	0.000152045	0.00013986
427.5	0	0	0	0
432.5	0	0	0	0
437.5	0	0	0	0
442.5	0	0	0.000152045	0
447.5	0.000154536	0	0	0.00013986
452.5	0	0.000248663	0	0
457.5	0.000154536	0	0.00030409	0
462.5	0.000154536	0.000124332	0	0
467.5	0	0	0	0
472.5	0	0	0	0
477.5	0	0	0	0
482.5	0	0	0	0
487.5	0	0	0	0
492.5	0	0	0	0
497.5	0	0	0	0

## Sheet: Figure 10B-SEC-DGUC-4
	repeat 1	repeat 2	repeat 3	repeat 4
bin(nm)	fraction	fraction	fraction	fraction
2.5	0.000250627	0	0	0
7.5	0	0	0	0.000292398
12.5	0.00075188	0.000847458	0.000374392	0.000292398
17.5	0.00075188	0.00112994	0.000374392	0.000584795
22.5	0.00100251	0.00141243	0.00187196	0.00321637
27.5	0.00150376	0.00141243	0.000748783	0.00116959
32.5	0.00275689	0.00225989	0.00411831	0.00204678
37.5	0.00576441	0.00875706	0.0101086	0.00701754
42.5	0.0125313	0.0158192	0.0138525	0.0149123
47.5	0.0308271	0.0336158	0.0295769	0.030117
52.5	0.0578947	0.0587571	0.0509173	0.0614035
57.5	0.077193	0.0915254	0.0853613	0.0988304
62.5	0.105514	0.104237	0.102583	0.10731
67.5	0.109524	0.119209	0.115687	0.108772
72.5	0.110276	0.111299	0.11082	0.110526
77.5	0.0957393	0.0912429	0.100711	0.0973684
82.5	0.0862155	0.0765537	0.079371	0.0769006
87.5	0.0711779	0.0680791	0.0610258	0.0622807
92.5	0.0558897	0.0497175	0.0497941	0.048538
97.5	0.0360902	0.0412429	0.043055	0.0362573
102.5	0.0280702	0.0254237	0.0292025	0.0304094
107.5	0.024812	0.0240113	0.0265818	0.0225146
112.5	0.0175439	0.0149718	0.0187196	0.0195906
117.5	0.0150376	0.0135593	0.0123549	0.0131579
122.5	0.00977444	0.00649718	0.0131037	0.0108187
127.5	0.0085213	0.00621469	0.00711344	0.00818713
132.5	0.00350877	0.0059322	0.00861101	0.00292398
137.5	0.00300752	0.0039548	0.00262074	0.00321637
142.5	0.00451128	0.0039548	0.00374392	0.00233918
147.5	0.00300752	0.0019774	0.00262074	0.00146199
152.5	0.0037594	0.00169492	0.00112317	0.00146199
157.5	0.000501253	0.00169492	0.00262074	0.00292398
162.5	0.00150376	0.00141243	0.000374392	0.00146199
167.5	0.00100251	0.00338983	0.00112317	0.000877193
172.5	0.00125313	0.00141243	0.00149757	0.000584795
177.5	0.00175439	0.000282486	0.000374392	0.00233918
182.5	0.00125313	0.000564972	0.000374392	0.00116959
187.5	0.000250627	0.000564972	0.000374392	0
192.5	0.000250627	0.000282486	0.00149757	0.000584795
197.5	0.00100251	0.000282486	0.000374392	0.000584795
202.5	0.000250627	0.000282486	0.000374392	0.000877193
207.5	0.00150376	0.000282486	0	0
212.5	0.000250627	0.000564972	0.000374392	0.000877193
217.5	0.000501253	0	0.000374392	0.000292398
222.5	0.000250627	0.000282486	0.000374392	0.000584795
227.5	0.000250627	0.000564972	0.000748783	0.000292398
232.5	0.00075188	0	0	0.000292398
237.5	0.000250627	0	0.000374392	0.000292398
242.5	0.000501253	0	0	0.000292398
247.5	0.00075188	0.000282486	0.000374392	0
252.5	0.000250627	0	0	0.000292398
257.5	0	0.000282486	0	0
262.5	0.000501253	0	0	0
267.5	0	0	0	0
272.5	0.000250627	0.000282486	0.000374392	0.000292398
277.5	0.000250627	0	0	0
282.5	0	0.000282486	0	0
287.5	0	0	0	0.000292398
292.5	0	0.000282486	0	0
297.5	0	0.000282486	0	0
302.5	0	0	0	0
307.5	0	0.000282486	0	0
312.5	0.000250627	0	0	0
317.5	0	0.000282486	0.000374392	0
322.5	0	0	0	0
327.5	0	0	0	0
332.5	0	0	0.000374392	0.000292398
337.5	0	0	0	0
342.5	0.000250627	0	0	0
347.5	0	0	0	0
352.5	0	0	0	0
357.5	0.000250627	0	0	0
362.5	0.000250627	0	0.000374392	0
367.5	0	0	0	0
372.5	0	0	0	0
377.5	0	0	0	0
382.5	0	0	0.000374392	0
387.5	0	0	0	0
392.5	0	0	0	0.000292398
397.5	0	0	0	0
402.5	0	0	0	0
407.5	0	0	0	0
412.5	0	0	0	0
417.5	0	0	0	0
422.5	0	0.000282486	0.000374392	0
427.5	0	0	0	0
432.5	0	0	0	0
437.5	0	0	0	0
442.5	0	0.000282486	0	0.000292398
447.5	0.000250627	0	0	0
452.5	0	0	0	0
457.5	0	0	0	0
462.5	0	0	0	0
467.5	0	0	0	0
472.5	0	0	0	0
477.5	0	0	0	0
482.5	0	0	0	0
487.5	0.000250627	0	0	0
492.5	0	0	0	0
497.5	0	0	0	0
