# Supplementary material for: Isolation of small extracellular vesicles from small volumes of blood plasma using size exclusion chromatography and density gradient ultracentrifugation
Source: eLife. 2026 May 22;13:RP92796. doi: 10.7554/eLife.92796 (PMC13197162; doi:10.7554/eLife.92796)
Supplement: Figure 11—figure supplement 1—source data 1. [file elife-92796-fig11-figsupp1-data1.xlsx]

## Sheet: ReadMe
Source data for Figure 11–figure supplement 1.
This file contains numerical data corresponding to panels A and B in Figure 11–figure supplement 1.
Panel A shows particle concentration profiles measured by nanoparticle tracking analysis (NTA) across 13 fractions along the 1.5 mL tube for four different plasma samples. These profiles correspond to the density gradient context shown in Figure 2.
Panel B shows particle concentration profiles for selected fractions (SEC-DGUC-1 region, corresponding to four fractions shown in Figure 9B) for five independent plasma samples obtained from a biobank. The data in panel B are derived from different plasma sources than those in panel A.
Sheet descriptions:
Fig11-supp1A_profile: Particle concentration profiles across 13 fractions for four plasma samples
Fig11-supp1B_profile: Particle concentration profiles for five plasma samples

## Sheet: Fig11-supp1A-profile
	Sample 1	Sample 2	Sample 3	Sample 4		Density profile				Values reconstructed from plotted curves due to unavailability of original files.
volume position (uL)	Vesicle concentration (10^9, ml^-1)	Vesicle concentration (10^9, ml^-1)	Vesicle concentration (10^9, ml^-1)	Vesicle concentration (10^9, ml^-1)		volume position (uL)	Density (g/mL)
120	3.77837	2.08653	17.2868	2.47675		120	1.10304
220	1.01396	0.443641	9.0956	0.379553		220	1.08015
320	0.853775	0.239602	1.91223	0.339515		320	1.07447
420	1.40664	0.239413	5.32632	0.296369		420	1.07312
520	3.04612	0.310573	10.5982	0.377261		520	1.0706
620	4.0124	0.788297	5.928	0.915173		620	1.06714
720	11.004	0.848675	11.7954	2.14041		720	1.05892
820	27.6626	1.1973	77.3475	4.59746		820	1.05187
920	52.2529	3.24394	176.609	11.2888		920	1.04492
1020	90.4678	4.40899	391.109	16.4279		1020	1.04124
1120	168.783	6.22004	790.21	59.5388		1120	1.03873
						1220	1.0378

## Sheet: Fig11-supp1B-profile
	Biobank 1	Biobank 2	Biobank 3	Biobank 4	Biobank 5			Values reconstructed from plotted curves due to unavailability of original files.
postion	vesicle concentration (10^10, ml^-1)	vesicle concentration (10^10, ml^-1)	vesicle concentration (10^10, ml^-1)	vesicle concentration (10^10, ml^-1)	vesicle concentration (10^10, ml^-1)
1	1.5	1.09	1.41	1.3	2.15
2	0.28	0.13	0.59	0.7	0.42
3	3.22	5.09	3	6.71	2.16
4	14.1	32.18	12.93	12.24	5.1
