# Supplementary material for: Isolation of small extracellular vesicles from small volumes of blood plasma using size exclusion chromatography and density gradient ultracentrifugation
Source: eLife. 2026 May 22;13:RP92796. doi: 10.7554/eLife.92796 (PMC13197162; doi:10.7554/eLife.92796)
Supplement: Figure 11—figure supplement 2—source data 1. [file elife-92796-fig11-figsupp2-data1.xlsx]

## Sheet: ReadMe
Source data for Figure 11–figure supplement 2.
This file contains numerical data corresponding to the particle size distributions shown in Figure 11–figure supplement 2.
The data represent particle size distributions of SEC-DGUC-1 measured by nanoparticle tracking analysis (NTA) for five fasting plasma samples. The distributions illustrate variation in small extracellular vesicle (sEV) populations among different plasma sources.

## Sheet: Fig11-supp2-NTA
	Biobank 1		Biobank 2		Biobank 3		Biobank 4		Biobank 5			Values reconstructed from plotted curves due to unavailability of original files.
size (nm)	fraction	size (nm)	fraction	size (nm)	fraction	size (nm)	fraction	size (nm)	fraction
11.8352	0.000863196	23.02	0.000234523	8.42699	0.000676695	31.8888	0.00129072	28.8839	0.000522957
25.1211	0.000816646	39.6451	0.000674636	13.1865	0.00295288	36.7096	0.00186802	37.9219	0.00279303
40.4292	0.00128004	48.1374	0.00178999	17.4555	0.00126967	43.9159	0.000695334	40.3439	0.00439094
45.4924	0.00413822	52.3623	0.00322078	42.1638	0.000381669	50.0264	0.00451559	43.9597	0.00506511
51.8164	0.00876671	55.9949	0.00557563	48.1256	0.000613512	56.3212	0.00797861	51.7801	0.00515325
56.0817	0.0142311	61.4236	0.00709108	53.1	0.00195029	62.0757	0.0121334	57.8239	0.00801356
59.1212	0.017426	66.266	0.0101188	57.972	0.00495034	69.091	0.014506	62.6789	0.0123018
59.7724	0.0223843	69.0675	0.0121653	61.6623	0.00813921	77.7873	0.0193686	68.1388	0.0169265
60.9187	0.025794	77.1622	0.0170153	63.2989	0.0141509	78.3834	0.0231152	75.3855	0.0197875
62.2632	0.0287215	83.1588	0.0151697	63.7227	0.0116354	80.2478	0.0254312	79.0274	0.0230667
62.8203	0.0318142	90.4097	0.0184508	66.3477	0.0182701	81.1886	0.0274509	84.4772	0.026683
64.1644	0.0347069	99.4022	0.0216447	71.4555	0.0221028	83.0613	0.0305901	89.3288	0.0306352
65.657	0.0392881	101.907	0.0253476	74.1749	0.0190306	85.7569	0.0343308	93.5512	0.0318138
67.9312	0.0431165	102.532	0.0276169	78.9684	0.0171843	88.7947	0.0373576	101.366	0.0313137
75.5125	0.0466268	104.413	0.0299634	79.3827	0.0126011	93.5638	0.0330744	107.42	0.0352665
76.9129	0.0521412	110.947	0.0270331	82.7775	0.018899	99.8623	0.0351776	115.839	0.0350188
82.8453	0.0591329	116.944	0.0252715	83.1178	0.0226946	102.575	0.0319026	123.049	0.0342663
87.1435	0.0526508	125.405	0.0292255	84.8528	0.0256351	107.369	0.0301404	129.639	0.0315807
92.9535	0.0434428	132	0.0271282	86.7561	0.0287629	112.164	0.0284623	135.641	0.0302393
96.3175	0.0489043	136.791	0.0249458	90.5445	0.0318963	115.793	0.030481	141.46	0.032067
96.9974	0.0512266	145.225	0.0262948	103.079	0.0298467	119.436	0.0338442	143.493	0.0335207
99.878	0.0551063	155.466	0.0278127	105.024	0.0362736	123.691	0.0383003	144.71	0.03495
101.497	0.0527253	162.072	0.0268078	107.765	0.0322929	133.449	0.0428606	150.739	0.0362977
104.799	0.0500737	164.507	0.0296662	111.091	0.0414029	135.702	0.0379938	156.14	0.03504
105.078	0.0458062	169.349	0.032694	116.462	0.03712	136.946	0.0404921	157.329	0.0336961
106.271	0.0406441	174.739	0.0303439	117.627	0.0334231	137.98	0.0356263	162.114	0.0309255
108.948	0.0358913	181.92	0.0266502	121.884	0.0380472	139.534	0.0330726	164.487	0.0276494
113.23	0.0385784	186.674	0.0234466	124.312	0.0402334	140.996	0.0244438	168.664	0.0242903
123.096	0.0363071	190.271	0.0195957	127.121	0.0360995	141.64	0.0286458	173.064	0.0217772
124.236	0.0326703	190.472	0.0160181	130.26	0.0335138	142.444	0.0218241	178.247	0.0201777
125.867	0.0290474	196.804	0.0112798	133.246	0.0313305	147.026	0.0259596	183.92	0.0180411
129.589	0.0265386	201.671	0.0167446	135.619	0.0280544	149.467	0.0294062	193.871	0.0186733
136.993	0.0231281	208.316	0.0196052	139.721	0.0262457	154.707	0.0328491	196.259	0.0169098
146.965	0.0233216	209.549	0.0226311	147.065	0.0298251	159.091	0.029331	207.008	0.0145955
149.404	0.0207474	212.069	0.0245487	150.686	0.0310035	164.575	0.0254305	214.859	0.0122977
153.142	0.0175297	216.758	0.0217105	158.512	0.0316799	166.394	0.0231678	219.526	0.010851
160.14	0.0140337	218.531	0.0185181	160.939	0.033782	169.129	0.0205691	222.053	0.00986452
164.967	0.0155488	225.167	0.0204544	166.527	0.0364987	177	0.0184946	227.456	0.00877492
174.579	0.0143774	230.538	0.0162555	168.754	0.0332819	183.06	0.0203482	230.366	0.00962782
181.777	0.0123644	235.322	0.0134849	171.691	0.030111	185.716	0.0221041	232.29	0.0110464
186.556	0.00908958	238.953	0.0156717	172.418	0.0271966	193.267	0.0185049	238.294	0.00995709
190.956	0.00604723	243.785	0.017607	173.632	0.0236999	196.912	0.0191183	247.902	0.00828146
198.586	0.00901186	249.769	0.014585	179.946	0.0205577	208.905	0.018345	255.848	0.00707473
209.405	0.00826124	256.993	0.015093	185.977	0.017604	212.494	0.0163301	269.397	0.00533463
214.365	0.00555365	259.982	0.0132458	187.485	0.0149386	216.881	0.0138942	274.392	0.00360939
220.788	0.00364537	263.012	0.0117462	192.254	0.0131641	219.101	0.0154092	300.785	0.00343529
225.018	0.00558037	265.667	0.00964842	200.881	0.0104468	220.922	0.0170068	319.423	0.00252071
227.44	0.00717828	273.182	0.00997541	204.041	0.0134608	225.105	0.0143199	330.238	0.00134992
233.448	0.00650916	276.495	0.00749308	205.772	0.0162241	229.894	0.0119695	347.08	0.00135876
238.28	0.00852851	284.324	0.00403403	214.039	0.0189977	235.061	0.0108535	360.913	0.00119796
244.28	0.00701906	291.797	0.00679191	225.956	0.0170533	243.214	0.0089642	383.167	0.000957546
253.873	0.00391485	295.324	0.00935169	232.322	0.0142397	252.092	0.00691962	404.818	0.000716817
258.06	0.00156411	303.237	0.00797439	241.353	0.0150007	267.717	0.00484649	436.699	0.000817594
268.323	0.00535101	305.554	0.0065937	245.292	0.0142144	279.733	0.00342423	458.353	0.000828968
275.375	0.00297572	307.413	0.0045312	246.737	0.0114715	291.168	0.0041025	487.826	0.000760413
287.546	0.00275606	315.217	0.00293866	251.507	0.00794722	298.204	0.00279515
295.965	0.00259242	324.86	0.0048765	258.14	0.00954734	303.78	0.00217636
305.595	0.00318571	334.456	0.0020244	261.116	0.00635563	312.515	0.00179537
315.191	0.000417643	341.702	0.00488535	265.295	0.00324858	342.879	0.00228092
321.814	0.00100936	348.291	0.0021157	270.136	0.00610826	349.652	0.00145761
330.828	0.000173755	365.727	0.00136855	271.358	0.00804168	364.836	0.000848239
340.049	0.00120632	376.554	0.00137424	275.085	0.0107387	384.173	0.00128282
354.223	0.00101613	383.191	0.00339453	278.581	0.00854968	396.401	0.00113256
366.941	0.00246163	390.386	0.00112941	281.764	0.0035936	407.244	0.00265086
368.282	0.00111793	401.224	0.00222753	285.117	0.000485881	412.04	0.00105674
384.968	0.000622357	412.034	0.000468506	292.348	0.00175018	468.128	0.000876767
392.8	0.00188698	437.901	0.000734192	304.407	0.00047373
401.205	0.000294751	455.789	0.000572278	317.49	0.00254766
407.831	0.0012226	481.206	0.000420802	328.473	0.00529857
415.041	0.000470085	486.629	0.00134802	332.659	0.00286379
421.674	0.00207021			340.165	0.000899588
428.678	0.000832706			360.412	0.000331879
444.742	0.000517331			375.143	0.000417904
461.96	0.000578761			397.317	0.00168726
467.389	0.00217825			407.286	0.000773359
475.192	0.000501677			426.335	0.00105872
498.503	0.000378264
