# Supplementary material for: Isolation of small extracellular vesicles from small volumes of blood plasma using size exclusion chromatography and density gradient ultracentrifugation
Source: eLife. 2026 May 22;13:RP92796. doi: 10.7554/eLife.92796 (PMC13197162; doi:10.7554/eLife.92796)
Supplement: Supplementary file 1. — (a) Liquid chromatography with tandem mass spectrometry (LC-MS/MS) proteins identified in size exclusion chromatography (SEC)-DGUC-1 by LC-MS/MS analysis ranked according to emPAI values. (b) LC-MS/MS proteins identified in SEC-particle fraction (PF) by LC-MS/MS analysis ranked according to emPAI values. [file elife-92796-supp1.xlsx]

## Sheet: Supplementary File 1a
Accession	Description	Coverage	# Unique Peptides	# AAs	MW [kDa]	Modifications	emPAI
A0A075B6H6	Ig kappa chain C region (Fragment) OS=Homo sapiens GN=IGKC PE=1 SV=1	82.243	4	107	11.7	Phospho [S49; S52; Y85]	9999999
A0A075B6N9	Ig mu chain C region (Fragment) OS=Homo sapiens GN=IGHM PE=1 SV=2	55.4084	8	453	49.4	Phospho [Y65; S187; S193; T196; T205; S211]	2806.22
V9HVY1	Epididymis secretory sperm binding protein Li 78p OS=Homo sapiens GN=HEL-S-78p PE=2 SV=1	62.7291	31	491	55.9	Phospho [Y269; T274; T280; Y356; T360]	1653.82
B3VL17	Beta globin (Fragment) OS=Homo sapiens PE=3 SV=1	85.7143	2	105	11.5		999
P00738	Haptoglobin OS=Homo sapiens GN=HP PE=1 SV=1	41.8719	9	406	45.2		495.195
P02679	Fibrinogen gamma chain OS=Homo sapiens GN=FGG PE=1 SV=3	59.3819	4	453	51.5		302.92
Q4TZM4	Hemoglobin beta chain (Fragment) OS=Homo sapiens GN=HBB PE=3 SV=1	89.1089	2	101	11		267.27
A0N5G1	Rheumatoid factor C6 light chain (Fragment) OS=Homo sapiens GN=V<kappa>1 PE=2 SV=1	40.5172	3	116	12.5	Phospho [T5; S7; S9; T10; S12]	214.443
Q86TT1	Full-length cDNA clone CS0DD006YL02 of Neuroblastoma of Homo sapiens (human) OS=Homo sapiens PE=2 SV=1	50.9333	2	375	41.2	Phospho [S93; T96; T97; Y98; T101; S102; T103; T105; S109]	207.93
P02671	Fibrinogen alpha chain OS=Homo sapiens GN=FGA PE=1 SV=2	37.067	32	866	94.9	Phospho [S294; S297; S299; S300; T484; S485; S489; T499]	163.965
A2J1N4	Rheumatoid factor RF-IP24 (Fragment) OS=Homo sapiens PE=2 SV=1	34.6939	2	98	10.8		157.489
A0A024R3E3	Apolipoprotein A-I, isoform CRA_a OS=Homo sapiens GN=APOA1 PE=3 SV=1	70.7865	22	267	30.8		110.588
P00739-2	Isoform 2 of Haptoglobin-related protein OS=Homo sapiens GN=HPR	47.2727	7	385	43	Phospho [S261]	99
A0N071	Delta globin OS=Homo sapiens GN=HBD PE=3 SV=1	78.9116	5	147	16		99
A0A0A0MT96	Protein IGKJ3 (Fragment) OS=Homo sapiens GN=IGKJ3 PE=1 SV=1	69.2308	2	13	1.4		99
P01591	Immunoglobulin J chain OS=Homo sapiens GN=JCHAIN PE=1 SV=4	48.4277	10	159	18.1	Phospho [Y85]	78.433
L8E853	von Willebrand factor OS=Homo sapiens GN=VWF PE=4 SV=1	36.7587	2	2715	298.2	Phospho [Y1363; T1364; T2482; Y2483; S2519; S2523]	69.253
A2NB45	Cold agglutinin FS-1 L-chain (Fragment) OS=Homo sapiens PE=2 SV=1	46.9027	3	113	12.4		67.129
G3V1N2	HCG1745306, isoform CRA_a OS=Homo sapiens GN=HBA2 PE=1 SV=1	41.8182	2	110	11.9		67.129
A2MYD2	V1-19 protein (Fragment) OS=Homo sapiens GN=V1-19 PE=4 SV=1	33.3333	2	99	10.3		62.096
S6B294	IgG L chain OS=Homo sapiens PE=2 SV=1	37.2973	2	185	20.1	Phospho [T131; S136]	58.948
Q9UL90	Myosin-reactive immunoglobulin heavy chain variable region (Fragment) OS=Homo sapiens PE=2 SV=1	47.7876	2	113	12.4		55.234
A0A125QYY9	IBM-B2 heavy chain variable region (Fragment) OS=Homo sapiens PE=2 SV=1	30.8943	2	123	13.6		50.795
A0A193CHR0	10E8 heavy chain variable region (Fragment) OS=Homo sapiens PE=2 SV=1	34.3511	2	131	14.4	Phospho [S7]	50.795
A2MYD4	V2-7 protein (Fragment) OS=Homo sapiens GN=V2-7 PE=4 SV=1	62.5	6	96	10.3		45.416
A0A0B4J1Y9	Immunoglobulin heavy variable 3-72 OS=Homo sapiens GN=IGHV3-72 PE=3 SV=1	32.7731	3	119	13.2		45.416
A0A075B6J9	Immunoglobulin lambda variable 2-18 OS=Homo sapiens GN=IGLV2-18 PE=3 SV=2	24.5763	2	118	12.4		45.416
P01023	Alpha-2-macroglobulin OS=Homo sapiens GN=A2M PE=1 SV=3	41.6554	47	1474	163.2		42.067
B4E1D8	cDNA FLJ51597, highly similar to C4b-binding protein alpha chain OS=Homo sapiens PE=2 SV=1	43.6567	21	536	60.4		39.842
P01766	Immunoglobulin heavy variable 3-13 OS=Homo sapiens GN=IGHV3-13 PE=1 SV=2	22.4138	2	116	12.5		38.811
A0A0A0MSV6	Complement C1q subcomponent subunit B (Fragment) OS=Homo sapiens GN=C1QB PE=1 SV=6	26.3158	6	228	24		37.312
A2KBC4	Anti-TN-C scFv (Fragment) OS=Homo sapiens PE=2 SV=1	35.2941	2	238	25.1	Phospho [S7]	33.551
B1N7B6	Cryocrystalglobulin CC1 heavy chain variable region (Fragment) OS=Homo sapiens PE=2 SV=1	31.6667	3	120	13.2		30.623
Q5CZ94	Putative uncharacterized protein DKFZp781M0386 OS=Homo sapiens GN=DKFZp781M0386 PE=2 SV=1	33.3333	2	234	25		30.623
U3PXP0	Alpha globin chain (Fragment) OS=Homo sapiens GN=HBA2 PE=3 SV=1	66.6667	2	51	5.7	Phospho [Y25]	30.623
Q5NV69	V1-13 protein (Fragment) OS=Homo sapiens GN=V1-13 PE=4 SV=1	33	2	100	10.3		30.623
A0A0X9T7T4	MS-D3 heavy chain variable region (Fragment) OS=Homo sapiens PE=2 SV=1	37.3134	3	134	15		26.826
A0A125QYY4	GCT-A7 heavy chain variable region (Fragment) OS=Homo sapiens PE=2 SV=1	47.0588	2	119	13.1		25.827
A2IPI4	HRV Fab 025-VL (Fragment) OS=Homo sapiens PE=2 SV=1	39.823	2	113	12.1		20.544
Q0ZCJ1	Immunglobulin heavy chain variable region (Fragment) OS=Homo sapiens PE=4 SV=1	34.7107	2	121	13.4		18.307
A0A0S2Z3Y1	Lectin galactoside-binding soluble 3 binding protein isoform 1 (Fragment) OS=Homo sapiens GN=LGALS3BP PE=2 SV=1	35.2137	16	585	65.3	Phospho [Y442]	17.738
O43866	CD5 antigen-like OS=Homo sapiens GN=CD5L PE=1 SV=1	50.1441	13	347	38.1	Phospho [T234]	17.233
F6KPG5	Albumin (Fragment) OS=Homo sapiens PE=2 SV=1	42.3932	24	585	66.5		13.678
S6BAR0	IgG L chain OS=Homo sapiens PE=2 SV=1	25.463	2	216	23.1		13.678
A2J1N0	Rheumatoid factor RF-IP14 (Fragment) OS=Homo sapiens PE=2 SV=1	44.7917	2	96	10.5		13.678
A2J1N5	Rheumatoid factor RF-ET6 (Fragment) OS=Homo sapiens PE=2 SV=1	27.6596	2	94	10.4		13.678
Q65ZC9	Single-chain Fv (Fragment) OS=Homo sapiens GN=scFv PE=2 SV=1	23.3333	2	240	25.6		13.251
A0A0X9UWK7	MS-D4 heavy chain variable region (Fragment) OS=Homo sapiens PE=2 SV=1	52.459	2	122	13.5		12.335
B6EDE2	Epididymis luminal protein 180 (Fragment) OS=Homo sapiens GN=HEL180 PE=2 SV=1	27.6423	2	123	13.3		12.335
A0A0X9T7V9	GCT-A4 light chain variable region (Fragment) OS=Homo sapiens PE=2 SV=1	59.633	2	109	11.8	Phospho [S26; S28; S31]	9
A0A109PP82	MS-C2 light chain variable region (Fragment) OS=Homo sapiens PE=2 SV=1	16.8224	2	107	11.7	Phospho [T5; S7; S9; S10]	9
A0A0B4J1U7	Immunoglobulin heavy variable 6-1 OS=Homo sapiens GN=IGHV6-1 PE=3 SV=1	23.1405	2	121	13.5		9
A0A075B6I0	Immunoglobulin lambda variable 8-61 OS=Homo sapiens GN=IGLV8-61 PE=3 SV=7	14.7541	2	122	12.8		9
P01709	Immunoglobulin lambda variable 2-8 OS=Homo sapiens GN=IGLV2-8 PE=1 SV=2	9.32203	2	118	12.4		9
A0A024R462	Fibronectin 1, isoform CRA_n OS=Homo sapiens GN=FN1 PE=4 SV=1	28.62	44	2355	259		8.59
A0A0S2Z4L3	Protein S isoform 2 (Fragment) OS=Homo sapiens GN=PROS1 PE=2 SV=1	35.3107	17	708	78.8		7.516
P13645	Keratin, type I cytoskeletal 10 OS=Homo sapiens GN=KRT10 PE=1 SV=6	30.3082	17	584	58.8		6.814
P10909-2	Isoform 2 of Clusterin OS=Homo sapiens GN=CLU	24.7505	15	501	57.8		6.743
P02649	Apolipoprotein E OS=Homo sapiens GN=APOE PE=1 SV=1	42.5868	12	317	36.1		6.586
P11226	Mannose-binding protein C OS=Homo sapiens GN=MBL2 PE=1 SV=2	36.6935	7	248	26.1		6.356
P02747	Complement C1q subcomponent subunit C OS=Homo sapiens GN=C1QC PE=1 SV=3	21.2245	4	245	25.8		6.197
Q0ZCH6	Immunglobulin heavy chain variable region (Fragment) OS=Homo sapiens PE=4 SV=1	35.8779	3	131	14.3		6.197
Q9Y6R7	IgGFc-binding protein OS=Homo sapiens GN=FCGBP PE=1 SV=3	25.5504	69	5405	571.6		6.023
Q8NCL6	cDNA FLJ90170 fis, clone MAMMA1000370, highly similar to Ig alpha-1 chain C region OS=Homo sapiens PE=2 SV=1	28.3976	2	493	53.2		6.017
B4E1N5	cDNA FLJ53694, highly similar to Apolipoprotein-L1 OS=Homo sapiens PE=2 SV=1	22.4189	6	339	37.8	Phospho [S252; S255]	5.661
Q9BWP8-10	Isoform 10 of Collectin-11 OS=Homo sapiens GN=COLEC11	27.7193	6	285	30.2		5.661
A0A109PS54	GCT-A8 light chain variable region (Fragment) OS=Homo sapiens PE=2 SV=1	39.2857	2	112	12.5		5.31
A0A0X9V9B3	MS-F1 light chain variable region (Fragment) OS=Homo sapiens PE=2 SV=1	33.0357	2	112	12.1		5.31
Q8TBD0	Uncharacterized protein (Fragment) OS=Homo sapiens PE=2 SV=1	15.1515	2	132	14		5.31
O75636	Ficolin-3 OS=Homo sapiens GN=FCN3 PE=1 SV=2	28.0936	9	299	32.9		5.158
Q6MZU6	Putative uncharacterized protein DKFZp686C15213 OS=Homo sapiens GN=DKFZp686C15213 PE=2 SV=1	21.5517	3	464	51.1		4.926
Q59E93	Membrane alanine aminopeptidase variant (Fragment) OS=Homo sapiens PE=2 SV=1	23.4391	11	977	110.5		4.745
B0YIW2	Apolipoprotein C-III OS=Homo sapiens GN=APOC3 PE=1 SV=1	23.0769	2	117	12.8		4.623
G1FM90	Anti-Influenza A hemagglutinin heavy chain variable region (Fragment) OS=Homo sapiens PE=2 SV=1	24.031	2	129	14.5		4.179
Q9Y509	VH3 protein (Fragment) OS=Homo sapiens GN=VH3 PE=2 SV=1	23.1293	2	147	15.8		4.179
A0A0C4DH35	Protein IGHV3-35 (Fragment) OS=Homo sapiens GN=IGHV3-35 PE=1 SV=1	18.8034	2	117	12.8		4.179
Q53H26	Transferrin variant (Fragment) OS=Homo sapiens PE=2 SV=1	41.6905	25	698	77		3.885
H6VRG1	Keratin 1 OS=Homo sapiens GN=KRT1 PE=3 SV=1	26.5116	16	645	66.1		3.833
P00915	Carbonic anhydrase 1 OS=Homo sapiens GN=CA1 PE=1 SV=2	34.0996	6	261	28.9		3.642
P07737	Profilin-1 OS=Homo sapiens GN=PFN1 PE=1 SV=2	44.2857	5	140	15		3.642
B2R4R0	Histone H4 OS=Homo sapiens GN=HIST1H4H PE=2 SV=1	40.7767	4	103	11.4		3.642
A0A0F7T6Q1	IGHV1-2 protein (Fragment) OS=Homo sapiens GN=IGHV1-2 PE=4 SV=1	24.7619	3	105	11.9		3.642
P04430	Immunoglobulin kappa variable 1-16 OS=Homo sapiens GN=IGKV1-16 PE=1 SV=2	29.0598	2	117	12.6		3.642
A0A0J9YX35	Uncharacterized protein (Fragment) OS=Homo sapiens PE=1 SV=1	18.8034	2	117	12.8		3.642
A2N0T5	VH6DJ protein (Fragment) OS=Homo sapiens GN=VH6DJ PE=2 SV=1	24.3478	2	115	12.8		3.642
P63261	Actin, cytoplasmic 2 OS=Homo sapiens GN=ACTG1 PE=1 SV=1	24	3	375	41.8		3.489
S6B2B6	IgG H chain OS=Homo sapiens PE=2 SV=1	19.2727	3	275	29.3		3.329
P20851	C4b-binding protein beta chain OS=Homo sapiens GN=C4BPB PE=1 SV=1	27.7778	6	252	28.3		3.217
A0A068LKQ2	Ig heavy chain variable region (Fragment) OS=Homo sapiens PE=2 SV=1	30.8333	3	120	13.2		3.217
Q8WWZ8	Oncoprotein-induced transcript 3 protein OS=Homo sapiens GN=OIT3 PE=1 SV=2	27.3394	12	545	60		3.175
P48740	Mannan-binding lectin serine protease 1 OS=Homo sapiens GN=MASP1 PE=1 SV=3	25.0358	3	699	79.2		2.765
A2J1N9	Rheumatoid factor RF-ET12 (Fragment) OS=Homo sapiens PE=2 SV=1	27.0833	2	96	10.5		2.728
A8K6Q8	cDNA FLJ75881, highly similar to Homo sapiens transferrin receptor (p90, CD71) (TFRC), mRNA OS=Homo sapiens PE=2 SV=1	32.7632	23	760	84.8		2.704
A0A0G2JPR0	Complement C4-A OS=Homo sapiens GN=C4A PE=1 SV=1	22.7064	2	1744	192.8		2.565
P62979	Ubiquitin-40S ribosomal protein S27a OS=Homo sapiens GN=RPS27A PE=1 SV=2	21.7949	3	156	18		2.511
A2J422	Anti-HER3 scFv (Fragment) OS=Homo sapiens PE=2 SV=1	16.8033	3	244	26		2.511
P48740-2	Isoform 2 of Mannan-binding lectin serine protease 1 OS=Homo sapiens GN=MASP1	22.6648	3	728	81.8		2.35
E9KL23	Epididymis secretory sperm binding protein Li 44a OS=Homo sapiens GN=SERPINA1 PE=2 SV=1	18.4211	8	418	46.7		2.3
P35908	Keratin, type II cytoskeletal 2 epidermal OS=Homo sapiens GN=KRT2 PE=1 SV=2	25.3521	12	639	65.4		2.248
Q59EP2	Angiotensinogen variant (Fragment) OS=Homo sapiens PE=2 SV=1	15.4786	7	491	53.7		2.162
A0A024RB87	RAP1B, member of RAS oncogene family, isoform CRA_a OS=Homo sapiens GN=RAP1B PE=4 SV=1	33.1522	6	184	20.8		2.162
P02760	Protein AMBP OS=Homo sapiens GN=AMBP PE=1 SV=1	21.875	5	352	39		2.162
P19652	Alpha-1-acid glycoprotein 2 OS=Homo sapiens GN=ORM2 PE=1 SV=2	18.408	3	201	23.6		2.162
A2JA19	Anti-mucin1 light chain variable region (Fragment) OS=Homo sapiens PE=2 SV=1	31.7757	2	107	11.7		2.162
E9PR17	CD59 glycoprotein OS=Homo sapiens GN=CD59 PE=1 SV=1	18.4615	2	130	14.5		2.162
A0A075B6I9	Immunoglobulin lambda variable 7-46 OS=Homo sapiens GN=IGLV7-46 PE=3 SV=4	15.3846	2	117	12.5		2.162
A0A1B1CYC8	Vitamin D binding protein (Fragment) OS=Homo sapiens GN=Gc PE=4 SV=1	28.2051	2	39	4.2		2.162
B3KS79	cDNA FLJ35730 fis, clone TESTI2003131, highly similar to ALPHA-1-ANTICHYMOTRYPSIN OS=Homo sapiens PE=2 SV=1	23.2143	9	448	50.6		2.02
C0JYY2	Apolipoprotein B (Including Ag(X) antigen) OS=Homo sapiens GN=APOB PE=4 SV=1	23.9535	99	4563	515.2		1.906
P02775	Platelet basic protein OS=Homo sapiens GN=PPBP PE=1 SV=3	26.5625	3	128	13.9		1.683
A5YAK2	Apolipoprotein C-IV OS=Homo sapiens GN=APOC4 PE=2 SV=1	22.0472	2	127	14.6		1.683
A0A024R9J3	Collectin sub-family member 10 (C-type lectin), isoform CRA_a OS=Homo sapiens GN=COLEC10 PE=4 SV=1	11.9134	3	277	30.7		1.581
V9HW22	Epididymis luminal protein 33 OS=Homo sapiens GN=HEL-S-72p PE=2 SV=1	26.6254	12	646	70.9		1.572
P08514	Integrin alpha-IIb OS=Homo sapiens GN=ITGA2B PE=1 SV=3	17.4206	15	1039	113.3		1.565
Q8NI99	Angiopoietin-related protein 6 OS=Homo sapiens GN=ANGPTL6 PE=1 SV=1	20.4255	7	470	51.7		1.555
A0A024R056	Guanine nucleotide binding protein (G protein), beta polypeptide 1, isoform CRA_a OS=Homo sapiens GN=GNB1 PE=2 SV=1	19.4118	4	340	37.4		1.512
S6BGE0	IgG H chain OS=Homo sapiens PE=2 SV=1	25.6667	3	300	32.2		1.512
A6NMH8	Tetraspanin OS=Homo sapiens GN=CD81 PE=1 SV=1	13.1387	2	274	29.8		1.512
P02776	Platelet factor 4 OS=Homo sapiens GN=PF4 PE=1 SV=2	19.802	2	101	10.8		1.512
O00560	Syntenin-1 OS=Homo sapiens GN=SDCBP PE=1 SV=1	20.8054	4	298	32.4		1.448
P12111	Collagen alpha-3(VI) chain OS=Homo sapiens GN=COL6A3 PE=1 SV=5	21.0891	59	3177	343.5		1.429
Q5EBM2	Uncharacterized protein OS=Homo sapiens PE=1 SV=1	16.9557	2	519	56.8		1.424
K7ER74	Protein APOC4-APOC2 OS=Homo sapiens GN=APOC4-APOC2 PE=1 SV=1	16.2921	2	178	20		1.371
P05109	Protein S100-A8 OS=Homo sapiens GN=S100A8 PE=1 SV=1	19.3548	2	93	10.8		1.371
Q8N699	Myc target protein 1 OS=Homo sapiens GN=MYCT1 PE=1 SV=1	11.9149	2	235	26.6	Phospho [S218; T219]	1.371
J3KQ66	Reelin OS=Homo sapiens GN=RELN PE=1 SV=1	14.2775	41	3460	388.2		1.33
B2R8I2	cDNA, FLJ93914, highly similar to Homo sapiens histidine-rich glycoprotein (HRG), mRNA OS=Homo sapiens PE=2 SV=1	13.7143	7	525	59.5		1.291
B7Z6Z4	Myosin light polypeptide 6 OS=Homo sapiens GN=MYL6 PE=1 SV=1	21.8487	5	238	26.7		1.254
P03951	Coagulation factor XI OS=Homo sapiens GN=F11 PE=1 SV=1	19.04	11	625	70.1		1.233
Q6MZX7	Putative uncharacterized protein DKFZp686M24218 OS=Homo sapiens GN=DKFZp686M24218 PE=2 SV=1	14.4958	2	476	52.4		1.228
F5H5D3	Tubulin alpha chain OS=Homo sapiens GN=TUBA1C PE=1 SV=1	22.158	4	519	57.7		1.212
L7UUZ7	Integrin beta OS=Homo sapiens GN=ITGB3 PE=2 SV=1	14.2132	10	788	86.9		1.154
P04406	Glyceraldehyde-3-phosphate dehydrogenase OS=Homo sapiens GN=GAPDH PE=1 SV=3	24.4776	6	335	36		1.154
P68366	Tubulin alpha-4A chain OS=Homo sapiens GN=TUBA4A PE=1 SV=1	21.2054	4	448	49.9		1.154
Q15485	Ficolin-2 OS=Homo sapiens GN=FCN2 PE=1 SV=2	11.8211	4	313	34		1.154
V9HW12	Epididymis secretory sperm binding protein Li 2a OS=Homo sapiens GN=HEL-S-2a PE=2 SV=1	19.1919	3	198	21.9		1.154
A1A508	PRSS3 protein OS=Homo sapiens GN=PRSS3 PE=2 SV=1	9.31174	2	247	26.5		1.154
A0A0X9UWM4	IBM-A3 heavy chain variable region (Fragment) OS=Homo sapiens PE=2 SV=1	19.685	2	127	14.4		1.154
A2NYU7	Heavy chain Fab (Fragment) OS=Homo sapiens PE=2 SV=1	18.1102	2	127	14		1.154
C9JF17	Apolipoprotein D (Fragment) OS=Homo sapiens GN=APOD PE=1 SV=1	11.6279	2	215	24.1		1.154
A0A068LRW4	Ig heavy chain variable region (Fragment) OS=Homo sapiens PE=2 SV=1	20.8333	2	120	13.1		1.154
G8JLH6	Tetraspanin (Fragment) OS=Homo sapiens GN=CD9 PE=1 SV=1	4.38596	2	228	25.4		1.154
Q9UL82	Myosin-reactive immunoglobulin light chain variable region (Fragment) OS=Homo sapiens PE=2 SV=1	19.6262	2	107	11.4		1.154
B1N7B7	Cryocrystalglobulin CC2 heavy chain variable region (Fragment) OS=Homo sapiens PE=2 SV=1	24.7934	2	121	13.4		1.154
P59665	Neutrophil defensin 1 OS=Homo sapiens GN=DEFA1 PE=1 SV=1	19.1489	2	94	10.2		1.154
A0A0G2JS06	Immunoglobulin lambda variable 5-39 OS=Homo sapiens GN=IGLV5-39 PE=3 SV=1	38.2114	2	123	13.4	Phospho [T4; S12; T15; S17; S19; T24]	1.154
A2J1M7	Rheumatoid factor RF-IP10 (Fragment) OS=Homo sapiens PE=2 SV=1	25	2	96	10.3		1.154
P35527	Keratin, type I cytoskeletal 9 OS=Homo sapiens GN=KRT9 PE=1 SV=3	15.8909	8	623	62		1.106
V9HWA9	Epididymis secretory sperm binding protein Li 62p OS=Homo sapiens GN=HEL-S-62p PE=2 SV=1	18.4005	27	1663	187		1.095
A4D1B1	CD36 antigen (Collagen type I receptor, thrombospondin receptor) OS=Homo sapiens GN=CD36 PE=2 SV=1	12.5	5	472	53		1.081
B4E1C2	Kininogen 1, isoform CRA_b OS=Homo sapiens GN=KNG1 PE=2 SV=1	17.7019	9	644	71.9		1.031
B7ZLM6	X-prolyl aminopeptidase (Aminopeptidase P) 2, membrane-bound OS=Homo sapiens GN=XPNPEP2 PE=2 SV=1	14.9852	9	674	75.6		1.021
D9ZGG2	Vitronectin OS=Homo sapiens GN=VTN PE=4 SV=1	14.2259	5	478	54.3		1.015
P21333	Filamin-A OS=Homo sapiens GN=FLNA PE=1 SV=4	20.136	39	2647	280.6		1.007
Q9ULI3	Protein HEG homolog 1 OS=Homo sapiens GN=HEG1 PE=1 SV=3	10.2824	11	1381	147.4		0.968
B7ZKY6	Membrane metallo-endopeptidase OS=Homo sapiens GN=MME PE=2 SV=1	17.6	12	750	85.5		0.945
O00187	Mannan-binding lectin serine protease 2 OS=Homo sapiens GN=MASP2 PE=1 SV=4	19.3878	10	686	75.7		0.931
P13647	Keratin, type II cytoskeletal 5 OS=Homo sapiens GN=KRT5 PE=1 SV=3	15.5932	7	590	62.3		0.931
P04899-4	Isoform sGi2 of Guanine nucleotide-binding protein G(i) subunit alpha-2 OS=Homo sapiens GN=GNAI2	16.3934	4	366	41.5		0.931
A0A024R1X6	Keratin 14 (Epidermolysis bullosa simplex, Dowling-Meara, Koebner), isoform CRA_a OS=Homo sapiens GN=KRT14 PE=3 SV=1	15.3257	4	261	30		0.931
A2J1M8	Rheumatoid factor RF-IP12 (Fragment) OS=Homo sapiens PE=2 SV=1	25.2632	2	95	10.7		0.931
P02763	Alpha-1-acid glycoprotein 1 OS=Homo sapiens GN=ORM1 PE=1 SV=1	19.9005	2	201	23.5		0.931
P00451	Coagulation factor VIII OS=Homo sapiens GN=F8 PE=1 SV=1	15.3126	31	2351	266.8		0.917
P01833	Polymeric immunoglobulin receptor OS=Homo sapiens GN=PIGR PE=1 SV=4	19.2408	11	764	83.2		0.905
Q59GX2	Solute carrier family 2 (Facilitated glucose transporter), member 1 variant (Fragment) OS=Homo sapiens PE=2 SV=1	9.8646	5	517	57		0.896
Q4W4Y1	Dopamine receptor interacting protein 4 OS=Homo sapiens GN=DRIP4 PE=2 SV=1	19.5853	14	868	96		0.874
E7EMB3	Calmodulin OS=Homo sapiens GN=CALM2 PE=1 SV=1	16.8367	3	196	21.7		0.874
A1L4H1	Soluble scavenger receptor cysteine-rich domain-containing protein SSC5D OS=Homo sapiens GN=SSC5D PE=1 SV=3	11.1888	13	1573	165.6		0.868
Q4LE33	TNC variant protein (Fragment) OS=Homo sapiens GN=TNC variant protein PE=2 SV=1	14.3305	26	2233	244.2		0.848
A8K486	Peptidyl-prolyl cis-trans isomerase OS=Homo sapiens PE=2 SV=1	21.2121	4	165	18		0.848
P02745	Complement C1q subcomponent subunit A OS=Homo sapiens GN=C1QA PE=1 SV=2	8.57143	2	245	26		0.848
P63104	14-3-3 protein zeta/delta OS=Homo sapiens GN=YWHAZ PE=1 SV=1	26.1224	4	245	27.7		0.833
P12109	Collagen alpha-1(VI) chain OS=Homo sapiens GN=COL6A1 PE=1 SV=3	12.8405	10	1028	108.5		0.829
A0A024R1F4	HCG2010666, isoform CRA_a OS=Homo sapiens GN=hCG_2010666 PE=4 SV=1	13.5325	6	569	61.4		0.812
B2RBH2	cDNA, FLJ95508, highly similar to Homo sapiens 5'-nucleotidase, ecto (CD73) (NT5E), mRNA OS=Homo sapiens PE=2 SV=1	16.3763	8	574	63.4		0.808
Q86UX7	Fermitin family homolog 3 OS=Homo sapiens GN=FERMT3 PE=1 SV=1	17.0915	10	667	75.9		0.778
P06727	Apolipoprotein A-IV OS=Homo sapiens GN=APOA4 PE=1 SV=3	18.4343	7	396	45.4		0.778
P05155-3	Isoform 3 of Plasma protease C1 inhibitor OS=Homo sapiens GN=SERPING1	10.495	5	505	55.7		0.778
P81605-2	Isoform 2 of Dermcidin OS=Homo sapiens GN=DCD	11.5702	2	121	12.4		0.778
A0A0A0MS14	Immunoglobulin heavy variable 1-45 OS=Homo sapiens GN=IGHV1-45 PE=3 SV=1	22.2222	2	117	13.5		0.778
P37840	Alpha-synuclein OS=Homo sapiens GN=SNCA PE=1 SV=1	23.5714	2	140	14.5		0.778
A0A0A0MSD0	Sushi, von Willebrand factor type A, EGF and pentraxin domain-containing protein 1 OS=Homo sapiens GN=SVEP1 PE=1 SV=1	13.4303	37	3574	390.2		0.738
Q08431	Lactadherin OS=Homo sapiens GN=MFGE8 PE=1 SV=2	13.4367	4	387	43.1		0.738
Q9H4B7	Tubulin beta-1 chain OS=Homo sapiens GN=TUBB1 PE=1 SV=1	15.9645	4	451	50.3		0.738
A0A158RFU6	RAB7, member RAS oncogene family, isoform CRA_a OS=Homo sapiens GN=RAB7A PE=2 SV=1	23.1884	4	207	23.5		0.719
P35579	Myosin-9 OS=Homo sapiens GN=MYH9 PE=1 SV=4	14.7959	26	1960	226.4		0.708
B5MD23	Tetraspanin OS=Homo sapiens GN=TSPAN9 PE=1 SV=1	9.5941	2	271	29.5		0.701
A0A024R035	Complement component 9, isoform CRA_a OS=Homo sapiens GN=C9 PE=4 SV=1	10.0179	6	559	63.2		0.682
E2RVJ0	Anion exchange protein OS=Homo sapiens GN=SLC4A1 PE=2 SV=1	9.75877	7	912	101.9		0.679
P15153	Ras-related C3 botulinum toxin substrate 2 OS=Homo sapiens GN=RAC2 PE=1 SV=1	11.4583	2	192	21.4		0.668
Q9Y490	Talin-1 OS=Homo sapiens GN=TLN1 PE=1 SV=3	15.7812	29	2541	269.6		0.665
P06396	Gelsolin OS=Homo sapiens GN=GSN PE=1 SV=1	13.2992	4	782	85.6		0.658
O15400	Syntaxin-7 OS=Homo sapiens GN=STX7 PE=1 SV=4	14.5594	3	261	29.8		0.638
B2R4P2	cDNA, FLJ92164, highly similar to Homo sapiens peroxiredoxin 1 (PRDX1), mRNA OS=Homo sapiens PE=2 SV=1	14.5729	2	199	22.2		0.638
Q1HP67	Lipoprotein, Lp(A) OS=Homo sapiens GN=LPA PE=3 SV=1	21.2255	15	2040	226.4		0.635
P07996	Thrombospondin-1 OS=Homo sapiens GN=THBS1 PE=1 SV=2	12.906	13	1170	129.3		0.616
P27169	Serum paraoxonase/arylesterase 1 OS=Homo sapiens GN=PON1 PE=1 SV=3	16.9014	4	355	39.7		0.585
P22748	Carbonic anhydrase 4 OS=Homo sapiens GN=CA4 PE=1 SV=2	9.29487	3	312	35		0.585
Q8N5I2	Arrestin domain-containing protein 1 OS=Homo sapiens GN=ARRDC1 PE=1 SV=1	7.85219	3	433	46		0.585
A0A024QZF2	Related RAS viral (R-ras) oncogene homolog, isoform CRA_a OS=Homo sapiens GN=RRAS PE=4 SV=1	15.1376	3	218	23.5		0.585
B4DR52	Histone H2B OS=Homo sapiens PE=2 SV=1	11.4458	3	166	18		0.585
Q6UWD8	Transmembrane protein C16orf54 OS=Homo sapiens GN=C16orf54 PE=1 SV=1	17.4107	2	224	24.3		0.585
A0A087WT59	Transthyretin OS=Homo sapiens GN=TTR PE=1 SV=1	7.56757	2	185	20.1		0.585
P26038	Moesin OS=Homo sapiens GN=MSN PE=1 SV=3	12.825	6	577	67.8		0.567
Q15582	Transforming growth factor-beta-induced protein ig-h3 OS=Homo sapiens GN=TGFBI PE=1 SV=1	11.2738	7	683	74.6		0.551
P13224-2	Isoform 2 of Platelet glycoprotein Ib beta chain OS=Homo sapiens GN=GP1BB	6.32603	3	411	43.1	Phospho [S396; T398]	0.551
P23467-3	Isoform 3 of Receptor-type tyrosine-protein phosphatase beta OS=Homo sapiens GN=PTPRB	13.0474	23	2215	249		0.543
P00747	Plasminogen OS=Homo sapiens GN=PLG PE=1 SV=2	16.5432	9	810	90.5		0.526
P02743	Serum amyloid P-component OS=Homo sapiens GN=APCS PE=1 SV=2	10.3139	2	223	25.4		0.52
O15162	Phospholipid scramblase 1 OS=Homo sapiens GN=PLSCR1 PE=1 SV=1	7.86164	2	318	35		0.52
P08134	Rho-related GTP-binding protein RhoC OS=Homo sapiens GN=RHOC PE=1 SV=1	10.3627	2	193	22		0.52
B4DMN1	cDNA FLJ61136, highly similar to Ras-related protein Rab-11A OS=Homo sapiens PE=2 SV=1	13.0268	3	261	28.8		0.501
A0A024R7I3	RAB8A, member RAS oncogene family, isoform CRA_a OS=Homo sapiens GN=RAB8A PE=4 SV=1	14.4928	2	207	23.7		0.501
B4DPQ0	Complement C1r subcomponent OS=Homo sapiens GN=C1R PE=1 SV=1	11.2656	6	719	81.8		0.468
P27105	Erythrocyte band 7 integral membrane protein OS=Homo sapiens GN=STOM PE=1 SV=3	15.625	3	288	31.7		0.468
A0A0S2Z428	HCG2039812, isoform CRA_b (Fragment) OS=Homo sapiens GN=KRT6A PE=2 SV=1	9.39716	2	564	60		0.468
P27348	14-3-3 protein theta OS=Homo sapiens GN=YWHAQ PE=1 SV=1	13.8776	2	245	27.7		0.468
B3KNB4	cDNA FLJ14168 fis, clone NT2RP2001440, highly similar to 14-3-3 protein gamma OS=Homo sapiens PE=2 SV=1	12.9555	2	247	28.2		0.468
A0A0A0MRJ7	Coagulation factor V OS=Homo sapiens GN=F5 PE=1 SV=1	7.89592	16	2229	252.1		0.445
P07355-2	Isoform 2 of Annexin A2 OS=Homo sapiens GN=ANXA2	15.1261	4	357	40.4		0.445
P12814-4	Isoform 4 of Alpha-actinin-1 OS=Homo sapiens GN=ACTN1	10.8602	3	930	107.1		0.441
P60174	Triosephosphate isomerase OS=Homo sapiens GN=TPI1 PE=1 SV=3	13.2867	3	286	30.8		0.438
P05089-2	Isoform 2 of Arginase-1 OS=Homo sapiens GN=ARG1	9.09091	3	330	35.6		0.438
G9K388	YWHAE/FAM22A fusion protein (Fragment) OS=Homo sapiens GN=YWHAE/FAM22A fusion PE=2 SV=1	8.33333	2	384	41.2		0.438
Q59EJ3	Heat shock 70kDa protein 1A variant (Fragment) OS=Homo sapiens PE=2 SV=1	13.1171	5	709	77.4		0.431
P59998-3	Isoform 3 of Actin-related protein 2/3 complex subunit 4 OS=Homo sapiens GN=ARPC4	10.1604	2	187	21.6		0.425
Q7YPT8	MHC class II antigen OS=Homo sapiens GN=HLA-DQA1/DRA PE=2 SV=1	11.3725	2	255	28.5		0.425
A0A024R5U5	ADAM metallopeptidase domain 10, isoform CRA_b OS=Homo sapiens GN=ADAM10 PE=4 SV=1	11.0963	7	748	84.1		0.42
Q658P3-2	Isoform 2 of Metalloreductase STEAP3 OS=Homo sapiens GN=STEAP3	9.63855	4	498	55.6		0.389
P18428	Lipopolysaccharide-binding protein OS=Homo sapiens GN=LBP PE=1 SV=3	7.06861	3	481	53.4		0.389
P07327	Alcohol dehydrogenase 1A OS=Homo sapiens GN=ADH1A PE=1 SV=2	7.2	3	375	39.8		0.389
O43707	Alpha-actinin-4 OS=Homo sapiens GN=ACTN4 PE=1 SV=2	9.22064	2	911	104.8		0.389
P25788	Proteasome subunit alpha type-3 OS=Homo sapiens GN=PSMA3 PE=1 SV=2	8.62745	2	255	28.4		0.389
Q8NG11	Tetraspanin-14 OS=Homo sapiens GN=TSPAN14 PE=1 SV=1	7.03704	2	270	30.7		0.389
O00194	Ras-related protein Rab-27B OS=Homo sapiens GN=RAB27B PE=1 SV=4	8.7156	2	218	24.6		0.389
B2RBW9	cDNA, FLJ95746, highly similar to Homo sapiens inhibin, beta C (INHBC), mRNA OS=Homo sapiens PE=2 SV=1	4.82955	2	352	38.2		0.389
Q92954-3	Isoform C of Proteoglycan 4 OS=Homo sapiens GN=PRG4	9.91609	10	1311	141		0.374
P06733	Alpha-enolase OS=Homo sapiens GN=ENO1 PE=1 SV=2	12.212	4	434	47.1		0.374
V9HW26	ATP synthase subunit alpha OS=Homo sapiens GN=HEL-S-123m PE=2 SV=1	10.4882	5	553	59.7		0.365
P05023	Sodium/potassium-transporting ATPase subunit alpha-1 OS=Homo sapiens GN=ATP1A1 PE=1 SV=1	9.18866	3	1023	112.8		0.363
P11049	Leukocyte antigen CD37 OS=Homo sapiens GN=CD37 PE=1 SV=2	8.54093	2	281	31.7		0.359
G3V5Z7	Proteasome subunit alpha type OS=Homo sapiens GN=PSMA6 PE=1 SV=1	8.33333	2	252	28.1		0.359
P37802-2	Isoform 2 of Transgelin-2 OS=Homo sapiens GN=TAGLN2	10	2	220	24.4		0.359
A0A024R962	HCG40889, isoform CRA_b OS=Homo sapiens GN=hCG_40889 PE=4 SV=1	8.04224	8	1231	139		0.35
A8K2W3	cDNA FLJ78516 OS=Homo sapiens PE=2 SV=1	7.76471	3	425	47.1		0.35
V9HW31	ATP synthase subunit beta OS=Homo sapiens GN=HEL-S-271 PE=1 SV=1	10.397	4	529	56.5		0.346
P55259	Pancreatic secretory granule membrane major glycoprotein GP2 OS=Homo sapiens GN=GP2 PE=2 SV=3	8.56611	4	537	59.4		0.346
P05546	Heparin cofactor 2 OS=Homo sapiens GN=SERPIND1 PE=1 SV=3	6.41283	4	499	57		0.346
B2R6J2	cDNA, FLJ92973, highly similar to Homo sapiens villin 2 (ezrin) (VIL2), mRNA OS=Homo sapiens PE=2 SV=1	8.53242	3	586	69.4		0.343
G9FP35	Guanine nucleotide binding protein OS=Homo sapiens GN=GNAQ PE=2 SV=1	10.3064	3	359	42.1		0.334
P23284	Peptidyl-prolyl cis-trans isomerase B OS=Homo sapiens GN=PPIB PE=1 SV=2	9.72222	2	216	23.7		0.334
V9HWC7	Epididymis secretory sperm binding protein Li 128m OS=Homo sapiens GN=HEL-S-128m PE=2 SV=1	8.48214	2	224	25		0.334
A0A0A0MT22	Protein tyrosine phosphatase, receptor type, C, isoform CRA_d OS=Homo sapiens GN=PTPRC PE=1 SV=1	7.5804	9	1306	147.4		0.328
V9HWB4	Epididymis secretory sperm binding protein Li 89n OS=Homo sapiens GN=HEL-S-89n PE=2 SV=1	10.0917	3	654	72.3		0.324
P04040	Catalase OS=Homo sapiens GN=CAT PE=1 SV=3	9.67742	4	527	59.7		0.322
P01031	Complement C5 OS=Homo sapiens GN=C5 PE=1 SV=4	7.27924	12	1676	188.2		0.318
B7ZKJ8	ITIH4 protein OS=Homo sapiens GN=ITIH4 PE=1 SV=1	5.88235	5	935	103.8		0.318
B2R815	cDNA, FLJ93695, highly similar to Homo sapiens serpin peptidase inhibitor, clade A (alpha-1 antiproteinase, antitrypsin), member 4 (SERPINA4), mRNA OS=Homo sapiens PE=2 SV=1	7.25995	3	427	48.5		0.318
I3L4C2	Brain-specific angiogenesis inhibitor 1-associated protein 2 OS=Homo sapiens GN=BAIAP2 PE=1 SV=1	10.6691	5	553	61.3		0.315
A0A024R9N6	EH-domain containing 4, isoform CRA_a OS=Homo sapiens GN=EHD4 PE=3 SV=1	8.31793	3	541	61.1		0.311
O00299	Chloride intracellular channel protein 1 OS=Homo sapiens GN=CLIC1 PE=1 SV=4	12.4481	2	241	26.9		0.311
P00918	Carbonic anhydrase 2 OS=Homo sapiens GN=CA2 PE=1 SV=2	7.30769	2	260	29.2		0.311
Q32Q10	RSU1 protein (Fragment) OS=Homo sapiens GN=RSU1 PE=2 SV=1	5.71429	2	280	31.3		0.311
P02790	Hemopexin OS=Homo sapiens GN=HPX PE=1 SV=2	6.49351	3	462	51.6		0.304
B4E320	cDNA FLJ50065, highly similar to MAM domain-containing protein 2 OS=Homo sapiens PE=2 SV=1	5.53936	4	686	77.5		0.301
A0A024RDB8	Heparanase, isoform CRA_a OS=Homo sapiens GN=HPSE PE=4 SV=1	4.78821	3	543	61.1		0.292
A0A140VKA6	Testis secretory sperm-binding protein Li 233m OS=Homo sapiens PE=2 SV=1	4.60705	2	369	41.3		0.292
P00338-3	Isoform 3 of L-lactate dehydrogenase A chain OS=Homo sapiens GN=LDHA	8.03324	2	361	39.8		0.28
Q99816	Tumor susceptibility gene 101 protein OS=Homo sapiens GN=TSG101 PE=1 SV=2	6.66667	2	390	43.9		0.274
Q9Y277	Voltage-dependent anion-selective channel protein 3 OS=Homo sapiens GN=VDAC3 PE=1 SV=1	10.2473	2	283	30.6		0.274
Q9HBI1-2	Isoform 2 of Beta-parvin OS=Homo sapiens GN=PARVB	5.54156	2	397	45.2		0.274
Q5MY95	Ectonucleoside triphosphate diphosphohydrolase 8 OS=Homo sapiens GN=ENTPD8 PE=1 SV=2	4.64646	2	495	53.9		0.274
E0D851	Platelet glycoprotein Ib alpha OS=Homo sapiens GN=GP1BA PE=4 SV=1	4.51128	3	665	72.8		0.269
P19827	Inter-alpha-trypsin inhibitor heavy chain H1 OS=Homo sapiens GN=ITIH1 PE=1 SV=3	5.70801	4	911	101.3		0.266
A8K2T4	cDNA FLJ78207, highly similar to Human complement protein component C7 mRNA OS=Homo sapiens PE=2 SV=1	7.23606	5	843	93.3		0.265
Q59ER5	WD repeat-containing protein 1 isoform 1 variant (Fragment) OS=Homo sapiens PE=2 SV=1	7.85256	4	624	68.1		0.259
A0A024R8S5	Protein disulfide-isomerase OS=Homo sapiens GN=P4HB PE=2 SV=1	8.26772	4	508	57.1		0.259
Q6UX06	Olfactomedin-4 OS=Homo sapiens GN=OLFM4 PE=1 SV=1	7.64706	3	510	57.2		0.259
B7Z5W1	cDNA FLJ54854, highly similar to Junctional adhesion molecule A OS=Homo sapiens PE=2 SV=1	7.59076	2	303	32.8		0.259
B4DNE1	cDNA FLJ52708, highly similar to Basigin OS=Homo sapiens PE=2 SV=1	5.97403	2	385	42.2		0.259
A8K9M5	cDNA FLJ77947, highly similar to Human complement protein C8 beta subunit mRNA OS=Homo sapiens PE=2 SV=1	5.41455	3	591	67		0.25
A0A024RAL1	Chondroitin sulfate proteoglycan 2 (Versican), isoform CRA_c OS=Homo sapiens GN=CSPG2 PE=4 SV=1	4.48319	9	2409	264.9		0.241
A8K8Z4	cDNA FLJ78071, highly similar to Human MHC class III complement component C6 mRNA OS=Homo sapiens PE=2 SV=1	6.31692	5	934	104.6		0.233
Q06033	Inter-alpha-trypsin inhibitor heavy chain H3 OS=Homo sapiens GN=ITIH3 PE=1 SV=2	5.50562	4	890	99.8		0.233
P08195-4	Isoform 4 of 4F2 cell-surface antigen heavy chain OS=Homo sapiens GN=SLC3A2	4.99244	3	661	71.1		0.233
P49908	Selenoprotein P OS=Homo sapiens GN=SEPP1 PE=1 SV=3	4.72441	2	381	43.2		0.233
Q8N7G1	Purine nucleoside phosphorylase OS=Homo sapiens PE=2 SV=1	6.48464	2	293	32.5		0.233
A0A087WVC6	Receptor-type tyrosine-protein phosphatase eta OS=Homo sapiens GN=PTPRJ PE=1 SV=1	5.36513	5	1342	146.5		0.225
A0A024RAI1	ARP3 actin-related protein 3 homolog (Yeast), isoform CRA_a OS=Homo sapiens GN=ACTR3 PE=3 SV=1	5.74163	2	418	47.3		0.222
B4E3P1	cDNA FLJ57036, highly similar to Homo sapiens tropomyosin 2 (beta) (TPM2), transcript variant 2, mRNA OS=Homo sapiens PE=2 SV=1	6.93069	2	303	34.1		0.222
P04075-2	Isoform 2 of Fructose-bisphosphate aldolase A OS=Homo sapiens GN=ALDOA	5.98086	2	418	45.2		0.212
P22792	Carboxypeptidase N subunit 2 OS=Homo sapiens GN=CPN2 PE=1 SV=3	4.22018	2	545	60.5		0.212
P08697	Alpha-2-antiplasmin OS=Homo sapiens GN=SERPINF2 PE=1 SV=3	3.86965	2	491	54.5		0.212
B7ZKQ8	PODXL protein OS=Homo sapiens GN=PODXL PE=2 SV=1	3.57143	2	560	58.8		0.212
A0A0S2Z4I5	Complement factor properdin isoform 1 (Fragment) OS=Homo sapiens GN=CFP PE=2 SV=1	4.47761	2	469	51.2		0.212
H0YAC1	Plasma kallikrein (Fragment) OS=Homo sapiens GN=KLKB1 PE=1 SV=1	7.14286	4	686	76.8		0.207
Q05639	Elongation factor 1-alpha 2 OS=Homo sapiens GN=EEF1A2 PE=1 SV=1	4.10367	2	463	50.4		0.202
Q8WW52	Protein FAM151A OS=Homo sapiens GN=FAM151A PE=2 SV=2	4.78632	2	585	64		0.202
P15169	Carboxypeptidase N catalytic chain OS=Homo sapiens GN=CPN1 PE=1 SV=1	3.93013	2	458	52.3		0.202
A0A024R5Z9	Pyruvate kinase OS=Homo sapiens GN=PKM2 PE=3 SV=1	6.59134	3	531	58		0.199
A0A068W6H0	Basal cell adhesion molecule (Lutheran blood group) OS=Homo sapiens GN=BCAM PE=4 SV=1	5.73248	3	628	67.4		0.199
P05556	Integrin beta-1 OS=Homo sapiens GN=ITGB1 PE=1 SV=2	3.63409	3	798	88.4		0.189
V9HWG3	Epididymis secretory protein Li 45 OS=Homo sapiens GN=HEL-S-45 PE=2 SV=1	4.80349	3	687	77.3		0.189
P23229	Integrin alpha-6 OS=Homo sapiens GN=ITGA6 PE=1 SV=5	4.95575	5	1130	126.5		0.184
B2R6V9	cDNA, FLJ93141, highly similar to Homo sapiens coagulation factor XIII, A1 polypeptide (F13A1), mRNA OS=Homo sapiens PE=2 SV=1	4.78142	3	732	83.2		0.184
Q93084-5	Isoform SERCA3E of Sarcoplasmic/endoplasmic reticulum calcium ATPase 3 OS=Homo sapiens GN=ATP2A3	5.22814	4	1052	114.9		0.182
V9HWK2	Epididymis luminal protein 114 OS=Homo sapiens GN=HEL114 PE=2 SV=1	6.34921	6	1134	123.7		0.179
D3DRR6	Inter-alpha (Globulin) inhibitor H2, isoform CRA_a OS=Homo sapiens GN=ITIH2 PE=4 SV=1	4.85744	4	947	106.5		0.179
P80108	Phosphatidylinositol-glycan-specific phospholipase D OS=Homo sapiens GN=GPLD1 PE=1 SV=3	4.64286	3	840	92.3		0.179
Q5CZH6	V-type proton ATPase subunit a OS=Homo sapiens GN=DKFZp686N0561 PE=2 SV=1	3.57995	3	838	96.5		0.179
B2R6Q2	Alkaline phosphatase OS=Homo sapiens PE=2 SV=1	4.00763	2	524	57.2		0.179
Q59G88	Coronin (Fragment) OS=Homo sapiens PE=3 SV=1	3.22581	2	558	59.6		0.172
Q9ULV4-3	Isoform 3 of Coronin-1C OS=Homo sapiens GN=CORO1C	4.36433	2	527	58.9		0.166
P00558	Phosphoglycerate kinase 1 OS=Homo sapiens GN=PGK1 PE=1 SV=3	7.67386	2	417	44.6		0.166
A0A075B738	Platelet endothelial cell adhesion molecule OS=Homo sapiens GN=PECAM1 PE=1 SV=1	3.65854	2	738	82.5		0.166
A0A024R944	Serpin peptidase inhibitor, clade C (Antithrombin), member 1, isoform CRA_a OS=Homo sapiens GN=SERPINC1 PE=3 SV=1	6.25	2	464	52.6		0.166
M1VPF4	Tyrosine-protein kinase receptor OS=Homo sapiens GN=TPM3-ROS1 PE=2 SV=1	4.82759	3	725	82.4		0.158
P16157-14	Isoform Er13 of Ankyrin-1 OS=Homo sapiens GN=ANK1	4.94201	7	1983	217.3		0.156
P35858-2	Isoform 2 of Insulin-like growth factor-binding protein complex acid labile subunit OS=Homo sapiens GN=IGFALS	4.04355	2	643	70.2		0.155
D3YTG3	Target of Nesh-SH3 OS=Homo sapiens GN=ABI3BP PE=1 SV=1	3.5453	5	1777	195.2		0.153
P07900-2	Isoform 2 of Heat shock protein HSP 90-alpha OS=Homo sapiens GN=HSP90AA1	3.86417	3	854	98.1		0.151
D6RAR4	Hepatocyte growth factor activator OS=Homo sapiens GN=HGFAC PE=1 SV=1	4.53172	2	662	71.4		0.15
Q9NQ79	Cartilage acidic protein 1 OS=Homo sapiens GN=CRTAC1 PE=1 SV=2	2.72315	2	661	71.4		0.15
P11047	Laminin subunit gamma-1 OS=Homo sapiens GN=LAMC1 PE=1 SV=3	3.97763	5	1609	177.5		0.145
P00734	Prothrombin OS=Homo sapiens GN=F2 PE=1 SV=2	4.82315	2	622	70		0.141
Q16610-4	Isoform 4 of Extracellular matrix protein 1 OS=Homo sapiens GN=ECM1	3.52734	2	567	63.5		0.136
Q07954	Prolow-density lipoprotein receptor-related protein 1 OS=Homo sapiens GN=LRP1 PE=1 SV=2	3.58715	14	4544	504.3		0.133
P20701-2	Isoform 2 of Integrin alpha-L OS=Homo sapiens GN=ITGAL	2.94358	3	1223	134.3		0.131
G3XAI2	Laminin subunit beta-1 OS=Homo sapiens GN=LAMB1 PE=1 SV=1	2.98343	5	1810	200.3		0.122
P14543	Nidogen-1 OS=Homo sapiens GN=NID1 PE=1 SV=3	2.72654	3	1247	136.3		0.122
Q8IWA5-2	Isoform 2 of Choline transporter-like protein 2 OS=Homo sapiens GN=SLC44A2	2.81294	2	711	80.7		0.119
A0A024RDT4	Lymphocyte cytosolic protein 1 (L-plastin), isoform CRA_a OS=Homo sapiens GN=LCP1 PE=4 SV=1	2.71132	2	627	70.2		0.116
B2RDI5	cDNA, FLJ96627, highly similar to Homo sapiens calpain 1, (mu/I) large subunit (CAPN1), mRNA OS=Homo sapiens PE=2 SV=1	2.2409	2	714	81.8		0.116
Q13201	Multimerin-1 OS=Homo sapiens GN=MMRN1 PE=1 SV=3	3.99023	4	1228	138		0.114
P27487	Dipeptidyl peptidase 4 OS=Homo sapiens GN=DPP4 PE=1 SV=2	2.08877	2	766	88.2		0.108
O95342	Bile salt export pump OS=Homo sapiens GN=ABCB11 PE=1 SV=2	2.87661	3	1321	146.3		0.101
A0A161I202	Lactoferrin OS=Homo sapiens GN=LTF PE=2 SV=1	3.09423	2	711	78.3		0.101
O00522	Krev interaction trapped protein 1 OS=Homo sapiens GN=KRIT1 PE=1 SV=2	3.80435	2	736	84.3		0.101
P05107	Integrin beta-2 OS=Homo sapiens GN=ITGB2 PE=1 SV=2	2.3407	2	769	84.7		0.099
A0A0S2Z2Z6	Annexin (Fragment) OS=Homo sapiens GN=ANXA6 PE=2 SV=1	3.56612	2	673	75.8		0.096
P21439	Phosphatidylcholine translocator ABCB4 OS=Homo sapiens GN=ABCB4 PE=1 SV=2	2.5661	3	1286	141.4		0.095
A8K5A4	cDNA FLJ76826, highly similar to Homo sapiens ceruloplasmin (ferroxidase) (CP), mRNA OS=Homo sapiens PE=2 SV=1	2.34742	2	1065	122.1		0.087
P13612	Integrin alpha-4 OS=Homo sapiens GN=ITGA4 PE=1 SV=3	1.93798	2	1032	114.8		0.087
P17301	Integrin alpha-2 OS=Homo sapiens GN=ITGA2 PE=1 SV=1	1.52413	2	1181	129.2		0.087
P11171	Protein 4.1 OS=Homo sapiens GN=EPB41 PE=1 SV=4	2.31481	2	864	97		0.086
B0BCY7	Glutamyl aminopeptidase (Aminopeptidase A) OS=Homo sapiens GN=ENPEP PE=2 SV=1	2.19436	2	957	109.2		0.083
B0I1T2	Unconventional myosin-Ig OS=Homo sapiens GN=MYO1G PE=1 SV=2	1.57171	2	1018	116.4		0.078
P02549	Spectrin alpha chain, erythrocytic 1 OS=Homo sapiens GN=SPTA1 PE=1 SV=5	2.10831	5	2419	279.8		0.072
P56199	Integrin alpha-1 OS=Homo sapiens GN=ITGA1 PE=1 SV=2	1.61154	2	1179	130.8		0.072
B4E1Z4	Uncharacterized protein OS=Homo sapiens PE=1 SV=1	0.868878	2	1266	140.9		0.063
O75882	Attractin OS=Homo sapiens GN=ATRN PE=1 SV=2	1.60952	2	1429	158.4		0.062
Q59FP5	Spectrin, beta, erythrocytic (Includes spherocytosis, clinical type I) variant (Fragment) OS=Homo sapiens PE=2 SV=1	1.97256	4	2332	268.1		0.061
P24043	Laminin subunit alpha-2 OS=Homo sapiens GN=LAMA2 PE=1 SV=4	1.85778	5	3122	343.7		0.06
A0A087WVQ6	Clathrin heavy chain OS=Homo sapiens GN=CLTC PE=1 SV=1	1.9059	2	1679	191.9		0.05
P35555	Fibrillin-1 OS=Homo sapiens GN=FBN1 PE=1 SV=3	1.04493	3	2871	312		0.042
P98160	Basement membrane-specific heparan sulfate proteoglycan core protein OS=Homo sapiens GN=HSPG2 PE=1 SV=4	0.819859	3	4391	468.5		0.033
Q8WXI7	Mucin-16 OS=Homo sapiens GN=MUC16 PE=1 SV=3	0.744468	2	14507	1518.2		0.009
Q6GMX0	Uncharacterized protein OS=Homo sapiens PE=1 SV=1	45.339	1	236	25.8	Phospho [T131; S136; S178; S181; Y214]	1231.85
A0A125QYY5	GCT-A9 light chain variable region (Fragment) OS=Homo sapiens PE=2 SV=1	31.7757	1	107	11.6		999
Q6PIL8	IGK@ protein OS=Homo sapiens GN=IGK@ PE=1 SV=1	47.8814	1	236	25.8	Phospho [T131; S136; S178; S181; Y214]	824.404
Q6P5S8	IGK@ protein OS=Homo sapiens GN=IGK@ PE=1 SV=1	47.8814	1	236	25.8	Phospho [T131; S136; S178; S181; Y214]	680.292
V9HW34	Epididymis luminal protein 213 OS=Homo sapiens GN=HEL-213 PE=2 SV=1	50.2128	1	235	25.6	Phospho [T130; S135; S177; S180; Y213]	491.388
Q5EFE6	Anti-RhD monoclonal T125 kappa light chain OS=Homo sapiens PE=2 SV=1	43.5897	1	234	25.7	Phospho [T129; S134; S176; S179; Y212]	463.159
D9YZU5	Beta-globin OS=Homo sapiens GN=HBB PE=3 SV=1	78.9116	1	147	16		431.876
D3DP16	Fibrinogen gamma chain, isoform CRA_a OS=Homo sapiens GN=FGG PE=4 SV=1	60.7784	1	334	37.7		405.159
A2MYE1	A30 (Fragment) OS=Homo sapiens PE=4 SV=1	46.875	1	96	10.4		315.228
A0A068LKR7	Ig heavy chain variable region (Fragment) OS=Homo sapiens PE=2 SV=1	36	1	125	13.9	Phospho [S7]	214.443
Q6VFQ6	Hemoglobin beta chain (Fragment) OS=Homo sapiens GN=HBB PE=3 SV=1	61.9048	1	42	4.5		214.443
Q9UL72	Myosin-reactive immunoglobulin heavy chain variable region (Fragment) OS=Homo sapiens PE=2 SV=1	38.1356	1	118	12.9		145.78
Q9HCC1	Single chain Fv (Fragment) OS=Homo sapiens PE=1 SV=1	40.1786	1	112	12.2	Phospho [S7]	145.78
Q6IPQ0	IGL@ protein OS=Homo sapiens GN=IGL@ PE=2 SV=1	33.0508	1	236	24.8		99
A2NZ55	Variable immnoglobulin anti-estradiol heavy chain (Fragment) OS=Homo sapiens PE=2 SV=1	34.3511	1	131	13.9		99
Q7M4S4	Granulocyte inhibitory protein OS=Homo sapiens PE=1 SV=1	90	1	20	2		99
Q0ZCH4	Immunglobulin heavy chain variable region (Fragment) OS=Homo sapiens PE=4 SV=1	51.2821	1	117	13		73.989
Q0ZCI8	Immunglobulin heavy chain variable region (Fragment) OS=Homo sapiens PE=4 SV=1	48.3871	1	124	13.7	Phospho [S7]	73.989
Q6PIK1	IGL@ protein OS=Homo sapiens GN=IGL@ PE=1 SV=1	29.7872	1	235	24.8		64.793
P04275	von Willebrand factor OS=Homo sapiens GN=VWF PE=1 SV=4	36.6157	1	2813	309.1	Phospho [Y1363; T1364; T2482; Y2483; S2519; S2523; T2714; T2718]	63.817
A0A109PSY4	MS-A1 light chain variable region (Fragment) OS=Homo sapiens PE=2 SV=1	32.0755	1	106	11.4		62.096
A2MYD0	V1-17 protein (Fragment) OS=Homo sapiens GN=V1-17 PE=4 SV=1	46.4646	1	99	10.4		62.096
A2NYQ9	Anti-folate binding protein (Fragment) OS=Homo sapiens GN=HuVH8B VH PE=2 SV=1	35	1	120	13.3		50.795
Q9ULB6	Imunoglobulin heavy chain (Fragment) OS=Homo sapiens GN=VH PE=4 SV=1	50.5263	1	95	10.5	Phospho [S6]	50.795
Q6P2J1	Uncharacterized protein OS=Homo sapiens PE=2 SV=1	27.6596	1	235	25		49.119
Q6GMX3	IGL@ protein OS=Homo sapiens GN=IGL@ PE=2 SV=1	33.0508	1	236	24.7		42.288
Q0ZCF9	Immunglobulin heavy chain variable region (Fragment) OS=Homo sapiens PE=4 SV=1	35.5932	1	118	13		41.17
Q9UL70	Myosin-reactive immunoglobulin light chain variable region (Fragment) OS=Homo sapiens PE=2 SV=1	31.4815	1	108	11.6		36.276
Q569I7	Uncharacterized protein OS=Homo sapiens PE=2 SV=1	26.9841	1	189	20.7	Phospho [T131; S136]	34.938
S6AWD3	IgG L chain OS=Homo sapiens PE=2 SV=1	23.4973	1	183	19.9	Phospho [T129; S134]	34.938
Q6NS95	IGL@ protein OS=Homo sapiens GN=IGL@ PE=2 SV=1	33.3333	1	234	25.1		33.551
S6BGD6	IgG L chain OS=Homo sapiens PE=1 SV=1	38.7234	1	235	24.8		33.551
Q6PIQ7	IGL@ protein OS=Homo sapiens GN=IGL@ PE=1 SV=1	29.661	1	236	25		33.551
Q9UL83	Myosin-reactive immunoglobulin light chain variable region (Fragment) OS=Homo sapiens PE=2 SV=1	36.1111	1	108	11.8		30.623
A0A075B7F0	Protein IGHV3OR16-10 (Fragment) OS=Homo sapiens GN=IGHV3OR16-10 PE=1 SV=1	22.4138	1	116	12.6		30.623
S6B2B0	IgG L chain OS=Homo sapiens PE=2 SV=1	35.023	1	217	23.1		27.48
Q6DHW4	Uncharacterized protein OS=Homo sapiens PE=2 SV=1	28.27	1	237	25.1		25.102
S6BGE9	IgG L chain OS=Homo sapiens PE=2 SV=1	23.4973	1	183	19.9	Phospho [T129; S134]	24.119
A0A0X9UWL5	GCT-A5 light chain variable region (Fragment) OS=Homo sapiens PE=2 SV=1	37.1681	1	113	12.5		22.714
Q9UL93	Myosin-reactive immunoglobulin heavy chain variable region (Fragment) OS=Homo sapiens PE=2 SV=1	25.8621	1	116	12.4		20.544
A2J1M4	Rheumatoid factor RF-ET7 (Fragment) OS=Homo sapiens PE=2 SV=1	38.7755	1	98	10.9		20.544
Q0ZCH8	Immunglobulin heavy chain variable region (Fragment) OS=Homo sapiens PE=4 SV=1	23.0088	1	113	12.5		20.544
A2N2G5	VH87-2 protein (Fragment) OS=Homo sapiens GN=VH87-2 PE=2 SV=1	25.1852	1	135	14.5	Phospho [S7]	18.307
Q8TCZ8	Apolipoprotein E (Fragment) OS=Homo sapiens GN=APOE PE=4 SV=1	42.1053	1	57	6.7		16.783
Q6J1Z9	Hemoglobin alpha 1 (Fragment) OS=Homo sapiens GN=HBA1 PE=3 SV=1	35.5556	1	90	9.6		14.849
Q96SB0	Anti-streptococcal/anti-myosin immunoglobulin lambda light chain variable region (Fragment) OS=Homo sapiens PE=2 SV=1	41.6667	1	108	11.6		13.678
Q96K68	cDNA FLJ14473 fis, clone MAMMA1001080, highly similar to Homo sapiens SNC73 protein (SNC73) mRNA OS=Homo sapiens PE=2 SV=1	30.1619	1	494	53.1		13.454
A0A0C4DH72	Immunoglobulin kappa variable 1-6 OS=Homo sapiens GN=IGKV1-6 PE=3 SV=1	40.1709	1	117	12.7		12.895
A0A0F7T8B3	IGHV5-51 protein (Fragment) OS=Homo sapiens GN=IGHV5-51 PE=4 SV=1	47.2727	1	110	12.5		12.895
H0Y4K8	Fibronectin (Fragment) OS=Homo sapiens GN=FN1 PE=1 SV=1	21.9917	1	241	26.5		11.589
Q9NPP6	Immunoglobulin heavy chain variant (Fragment) OS=Homo sapiens PE=2 SV=1	31.9712	1	416	44.8		9
A0A125U0U7	MS-C1 heavy chain variable region (Fragment) OS=Homo sapiens PE=2 SV=1	25.4237	1	118	13.1		9
Q9UL78	Myosin-reactive immunoglobulin light chain variable region (Fragment) OS=Homo sapiens PE=2 SV=1	39.4495	1	109	11.6		9
Q0ZCI2	Immunglobulin heavy chain variable region (Fragment) OS=Homo sapiens PE=4 SV=1	21.3115	1	122	13.3		9
B1N7B8	Cryocrystalglobulin CC1 kappa light chain variable region (Fragment) OS=Homo sapiens PE=2 SV=1	28.0374	1	107	11.8		9
A0A109PVK5	GCT-A6 heavy chain variable region (Fragment) OS=Homo sapiens PE=2 SV=1	28.1481	1	135	15		9
A0A109PW50	IBM-B3 heavy chain variable region (Fragment) OS=Homo sapiens PE=2 SV=1	21.7742	1	124	13.8		9
P01704	Immunoglobulin lambda variable 2-14 OS=Homo sapiens GN=IGLV2-14 PE=1 SV=2	13.3333	1	120	12.6		9
Q6ZW64	cDNA FLJ41552 fis, clone COLON2004478, highly similar to Protein Tro alpha1 H,myeloma OS=Homo sapiens PE=2 SV=1	27.9352	1	494	53.3		7.185
Q6ZVX0	cDNA FLJ41981 fis, clone SMINT2011888, highly similar to Protein Tro alpha1 H,myeloma OS=Homo sapiens PE=2 SV=1	27.1047	1	487	52.8		6.499
A2NXP8	Heavy chain variable region (Fragment) OS=Homo sapiens PE=2 SV=1	34.1463	1	123	13.8		6.499
Q9UL88	Myosin-reactive immunoglobulin heavy chain variable region (Fragment) OS=Homo sapiens PE=2 SV=1	29.0076	1	131	14.1	Phospho [S7]	6.499
Q9UL95	Myosin-reactive immunoglobulin heavy chain variable region (Fragment) OS=Homo sapiens PE=2 SV=1	30.4	1	125	13.5		6.499
A0A075B7B8	Protein IGHV3OR16-12 (Fragment) OS=Homo sapiens GN=IGHV3OR16-12 PE=1 SV=1	26.4957	1	117	12.9		6.197
A2J1M2	Rheumatoid factor RF-IP9 (Fragment) OS=Homo sapiens PE=2 SV=1	36.7347	1	98	10.5		6.197
A2J1N6	Rheumatoid factor RF-ET9 (Fragment) OS=Homo sapiens PE=2 SV=1	26.9565	1	115	12.6		6.197
P06312	Immunoglobulin kappa variable 4-1 OS=Homo sapiens GN=IGKV4-1 PE=1 SV=1	29.7521	1	121	13.4		6.197
A0A125U0V4	GCT-A2 heavy chain variable region (Fragment) OS=Homo sapiens PE=2 SV=1	15.0794	1	126	13.8		6.197
A0A075B6H7	Protein IGKV3-7 (Fragment) OS=Homo sapiens GN=IGKV3-7 PE=1 SV=1	23.2759	1	116	12.8		6.197
Q6P089	IGH@ protein OS=Homo sapiens GN=IGH@ PE=2 SV=1	25.4167	1	480	52		5.813
A0A0C4DH36	Protein IGHV3-38 (Fragment) OS=Homo sapiens GN=IGHV3-38 PE=1 SV=1	9.48276	1	116	12.8		5.813
A2JA17	Anti-mucin1 heavy chain variable region (Fragment) OS=Homo sapiens PE=2 SV=1	23.0769	1	117	12.9		5.813
Q6MZX9	Putative uncharacterized protein DKFZp686M08189 OS=Homo sapiens GN=DKFZp686M08189 PE=2 SV=1	21.3251	1	483	52.2		5.7
Q6N092	Putative uncharacterized protein DKFZp686K18196 (Fragment) OS=Homo sapiens GN=DKFZp686K18196 PE=2 SV=1	26.2042	1	519	56.4		5.529
B4DP96	cDNA FLJ51269, highly similar to Aminopeptidase N (EC 3.4.11.2) OS=Homo sapiens PE=2 SV=1	24.0664	1	482	55.9		5.529
A2J1M5	Rheumatoid factor RF-IP4 (Fragment) OS=Homo sapiens PE=2 SV=1	27.6596	1	94	10.3		5.31
A2JA16	Anti-mucin1 light chain variable region (Fragment) OS=Homo sapiens PE=2 SV=1	31.7757	1	107	11.6		5.31
Q96JD0	Amyloid lambda 6 light chain variable region SAR (Fragment) OS=Homo sapiens PE=2 SV=1	20.6897	1	116	12.3		5.31
A0A075B7D4	Protein IGKV1OR2-108 (Fragment) OS=Homo sapiens GN=IGKV1OR2-108 PE=1 SV=1	16.2393	1	117	12.5	Phospho [T27; S29]	5.31
A0A125U0V1	MS-F1 heavy chain variable region (Fragment) OS=Homo sapiens PE=2 SV=1	26.9841	1	126	13.5		4.995
B4DPH5	cDNA FLJ55496, highly similar to Aminopeptidase N (EC 3.4.11.2) OS=Homo sapiens PE=2 SV=1	23.8274	1	533	61.4		4.843
A0N5G5	Rheumatoid factor D5 light chain (Fragment) OS=Homo sapiens GN=V<kappa>3 PE=2 SV=1	22.8814	1	118	12.8		4.623
Q9UL92	Myosin-reactive immunoglobulin heavy chain variable region (Fragment) OS=Homo sapiens PE=2 SV=1	30.6452	1	124	13.6		4.623
L8E9T8	Alternative protein SKIV2L2 OS=Homo sapiens GN=SKIV2L2 PE=4 SV=1	30.5085	1	59	6.9		4.623
A0A125U0U9	MS-C4 heavy chain variable region (Fragment) OS=Homo sapiens PE=2 SV=1	18.254	1	126	14.1		4.179
A2NXP9	K light chain variable region (Fragment) OS=Homo sapiens PE=2 SV=1	39.0909	1	110	12		4.179
Q16441	PROS1 protein (Fragment) OS=Homo sapiens GN=PROS1 PE=4 SV=1	61.4035	1	114	12.8		4.012
Q7Z379	Putative uncharacterized protein DKFZp686K04218 (Fragment) OS=Homo sapiens GN=DKFZp686K04218 PE=2 SV=1	20.7113	1	478	51.6		3.962
A0A0C4DH31	Immunoglobulin heavy variable 1-18 OS=Homo sapiens GN=IGHV1-18 PE=3 SV=1	26.4957	1	117	12.8		3.642
B1N7B9	Cryocrystalglobulin CC2 lambda light chain variable region (Fragment) OS=Homo sapiens PE=2 SV=1	28.1818	1	110	11.3		3.642
Q6GMX6	IGH@ protein OS=Homo sapiens GN=IGH@ PE=1 SV=1	30.5376	1	465	51.1		3.489
P04275-2	Isoform 2 of von Willebrand factor OS=Homo sapiens GN=VWF	19.6581	1	351	38.7		3.217
A0A1C9J6R5	B cell receptor heavy chain variable region (Fragment) OS=Homo sapiens PE=4 SV=1	14.3939	1	132	14.6		3.217
A0A0X9USL5	MS-D2 light chain variable region (Fragment) OS=Homo sapiens PE=2 SV=1	16.8224	1	107	11.4		2.981
A0A0X9V981	MS-A2 light chain variable region (Fragment) OS=Homo sapiens PE=2 SV=1	16.8224	1	107	11.5		2.981
A0A0X9TD88	GCT-A3 heavy chain variable region (Fragment) OS=Homo sapiens PE=2 SV=1	12.5984	1	127	13.8		2.728
A0A0M3KKW6	Fab Hu 15C1 Heavy chain OS=Homo sapiens PE=1 SV=1	18.6667	1	225	24.1		2.728
A0A0X9V9C4	GCT-A8 heavy chain variable region (Fragment) OS=Homo sapiens PE=2 SV=1	30	1	120	13.2		2.594
A0A0X9T0H6	GCT-A5 heavy chain variable region (Fragment) OS=Homo sapiens PE=2 SV=1	31.5789	1	114	12.7		2.594
P0C0L5	Complement C4-B OS=Homo sapiens GN=C4B PE=1 SV=2	21.1583	1	1744	192.6		2.436
Q6MZQ6	Putative uncharacterized protein DKFZp686G11190 OS=Homo sapiens GN=DKFZp686G11190 PE=2 SV=1	26.7368	1	475	52		2.162
A0A087WSY6	Immunoglobulin kappa variable 3D-15 OS=Homo sapiens GN=IGKV3D-15 PE=3 SV=6	26.087	1	115	12.5		2.162
Q0ZCI6	Immunglobulin heavy chain variable region (Fragment) OS=Homo sapiens PE=4 SV=1	27.0492	1	122	13.6		2.162
A2NB44	Cold agglutinin FS-2 H-chain (Fragment) OS=Homo sapiens GN=IGH@ PE=2 SV=1	21.9298	1	114	12.8		2.162
A0A0C4DH25	Immunoglobulin kappa variable 3-20 OS=Homo sapiens GN=IGKV3D-20 PE=3 SV=1	21.5517	1	116	12.5		2.162
A0A0F7TC28	IGHV4-4 protein (Fragment) OS=Homo sapiens GN=IGHV4-4 PE=4 SV=1	24.2424	1	99	10.8	Phospho [S59; S64; S69; T71]	2.162
Q14328	FN1 protein (Fragment) OS=Homo sapiens GN=FN1 PE=2 SV=1	48.7179	1	39	4.2		2.162
Q6N094	Putative uncharacterized protein DKFZp686O01196 OS=Homo sapiens GN=DKFZp686O01196 PE=2 SV=1	26.4583	1	480	52.6		2.02
A0N0V9	MHC class I antigen (Fragment) OS=Homo sapiens GN=HLA-B PE=3 SV=1	45.8564	1	181	21.1		1.894
Q6N091	Putative uncharacterized protein DKFZp686C02220 (Fragment) OS=Homo sapiens GN=DKFZp686C02220 PE=2 SV=1	18.4	1	500	54.1		1.873
Q6N097	Putative uncharacterized protein DKFZp686H20196 OS=Homo sapiens GN=DKFZp686H20196 PE=2 SV=1	24.948	1	481	52.7		1.873
S6BGD4	IgG H chain OS=Homo sapiens PE=2 SV=1	17.094	1	234	25		1.783
A8K3K1	cDNA FLJ78096, highly similar to Homo sapiens actin, alpha, cardiac muscle (ACTC), mRNA OS=Homo sapiens PE=2 SV=1	16.4456	1	377	42		1.721
A0A068LKQ5	Ig heavy chain variable region (Fragment) OS=Homo sapiens PE=2 SV=1	20.3252	1	123	13.6		1.683
A0N5G3	Rheumatoid factor G9 light chain (Fragment) OS=Homo sapiens GN=V<lambda>3 PE=2 SV=1	19.8347	1	121	12.9		1.683
A0A0B4J1V6	Immunoglobulin heavy variable 3-73 OS=Homo sapiens GN=IGHV3-73 PE=3 SV=1	18.4874	1	119	12.8		1.683
A0A068LN03	Ig heavy chain variable region (Fragment) OS=Homo sapiens PE=2 SV=1	12.5	1	120	13.4		1.683
H0YFH1	Alpha-2-macroglobulin (Fragment) OS=Homo sapiens GN=A2M PE=1 SV=1	26.0274	1	73	7.9		1.683
A2NKM7	NANUC-2 heavy chain (Fragment) OS=Homo sapiens PE=2 SV=1	24.812	1	133	14.6		1.512
A0A068LN11	Ig heavy chain variable region (Fragment) OS=Homo sapiens PE=2 SV=1	13.2231	1	121	13.5		1.512
A2J1N1	Rheumatoid factor RF-IP15 (Fragment) OS=Homo sapiens PE=2 SV=1	25.2874	1	87	9.6		1.512
P01706	Immunoglobulin lambda variable 2-11 OS=Homo sapiens GN=IGLV2-11 PE=1 SV=2	6.72269	1	119	12.6		1.512
A0A0X9USK2	MS-A6 heavy chain variable region (Fragment) OS=Homo sapiens PE=2 SV=1	10.1695	1	118	12.7		1.371
Q6N041	Putative uncharacterized protein DKFZp686O16217 (Fragment) OS=Homo sapiens GN=DKFZp686O16217 PE=2 SV=1	15.8635	1	498	54.1		1.291
Q9TPU9	MHC class I antigen (Fragment) OS=Homo sapiens GN=HLA-B PE=3 SV=2	29.4737	1	285	32.7		1.154
E3Q1J2	MHC class I antigen (Fragment) OS=Homo sapiens GN=HLA-B PE=3 SV=1	30.7692	1	273	31.6		1.154
A2IPI6	HRV Fab 027-VL (Fragment) OS=Homo sapiens PE=2 SV=1	14.1593	1	113	12.4		1.154
A0N5G4	Rheumatoid factor G9 heavy chain (Fragment) OS=Homo sapiens GN=VH4 PE=2 SV=1	21.0084	1	119	12.8		1.154
A0A0C4DH24	Immunoglobulin kappa variable 6-21 OS=Homo sapiens GN=IGKV6-21 PE=3 SV=1	10.5263	1	114	12.4		1.154
A2N0U0	VH6DJ protein (Fragment) OS=Homo sapiens GN=VH6DJ PE=2 SV=1	10.5263	1	114	12.6		1.154
A0A068LKQ8	Ig heavy chain variable region (Fragment) OS=Homo sapiens PE=2 SV=1	26.087	1	115	12.4		1.154
A0A075B6S9	Protein IGKV1-37 (Fragment) OS=Homo sapiens GN=IGKV1D-37 PE=4 SV=7	13.6752	1	117	12.7		1.154
A0N5G7	Rheumatoid factor D5 heavy chain (Fragment) OS=Homo sapiens GN=VH3 PE=2 SV=1	9.2437	1	119	13		1.154
S6BAQ4	IgG H chain OS=Homo sapiens PE=2 SV=1	15.678	1	236	25.3		0.995
Q9NXI0	cDNA FLJ20242 fis, clone COLF6369 OS=Homo sapiens PE=2 SV=1	21.6049	1	162	17.8		0.995
A0A0U5LWB3	MHC class I antigen (Fragment) OS=Homo sapiens GN=HLA-C PE=3 SV=1	27.1062	1	273	31.6		0.968
S6BAM6	IgG H chain OS=Homo sapiens PE=2 SV=1	20.0627	1	319	34.3		0.968
A0A075B7D8	Protein IGHV3OR15-7 (Fragment) OS=Homo sapiens GN=IGHV3OR15-7 PE=1 SV=1	20.1681	1	119	13.1		0.931
I6RGV3	MHC class I antigen (Fragment) OS=Homo sapiens GN=HLA-A PE=3 SV=1	30.3867	1	181	21.1		0.931
E5BBQ0	O6-alkylguanine-DNA alkyltransferase mutant (Fragment) OS=Homo sapiens PE=4 SV=1	14.2857	1	182	19.4		0.931
A2TEM8	MHC class I antigen (Fragment) OS=Homo sapiens GN=HLA-B PE=4 SV=1	15.7303	1	89	10.6		0.931
A2J1N7	Rheumatoid factor RF-ET10 (Fragment) OS=Homo sapiens PE=2 SV=1	22.9167	1	96	10.5		0.931
A0A0B7MI07	MHC class I antigen OS=Homo sapiens GN=HLA-B PE=3 SV=1	23.2044	1	362	40.3		0.874
Q14403	Gamma-G globin (Fragment) OS=Homo sapiens PE=2 SV=1	14.8387	1	155	17		0.874
P24844	Myosin regulatory light polypeptide 9 OS=Homo sapiens GN=MYL9 PE=1 SV=4	18.0233	1	172	19.8		0.874
P07437	Tubulin beta chain OS=Homo sapiens GN=TUBB PE=1 SV=2	15.3153	1	444	49.6		0.823
P68371	Tubulin beta-4B chain OS=Homo sapiens GN=TUBB4B PE=1 SV=1	15.2809	1	445	49.8		0.823
Q0ZCF6	Immunglobulin heavy chain variable region (Fragment) OS=Homo sapiens PE=4 SV=1	17.8295	1	129	14.5		0.778
J3QRS3	Myosin regulatory light chain 12A OS=Homo sapiens GN=MYL12A PE=1 SV=1	17.5141	1	177	20.4		0.778
P04921	Glycophorin-C OS=Homo sapiens GN=GYPC PE=1 SV=1	20.3125	1	128	13.8		0.778
A2N7P4	Immunoglobulin mu-chain D-J4-region (Fragment) OS=Homo sapiens GN=IGHM PE=4 SV=1	21.6667	1	120	13.3		0.778
V9GYM3	Apolipoprotein A-II OS=Homo sapiens GN=APOA2 PE=1 SV=1	7.5188	1	133	14.9		0.778
A0A0B4J1U3	Immunoglobulin lambda variable 1-36 OS=Homo sapiens GN=IGLV1-36 PE=3 SV=5	13.6752	1	117	12.5		0.778
L8EBA1	Alternative protein GPR98 OS=Homo sapiens GN=GPR98 PE=4 SV=1	20	1	75	9.2		0.778
E3Q0X1	MHC class I antigen (Fragment) OS=Homo sapiens GN=HLA-B PE=3 SV=1	22.3443	1	273	31.7		0.719
Q6ZP85	cDNA FLJ26301 fis, clone DMC07540 OS=Homo sapiens PE=2 SV=1	4.66102	1	236	25.8		0.701
S6B2A6	IgG H chain OS=Homo sapiens PE=2 SV=1	12.3333	1	300	32.1		0.638
P12110	Collagen alpha-2(VI) chain OS=Homo sapiens GN=COL6A2 PE=1 SV=4	9.71541	1	1019	108.5		0.621
Q7Z3M3	Tubulin alpha chain (Fragment) OS=Homo sapiens GN=DKFZp686L04275 PE=2 SV=1	11.2735	1	479	53.9		0.616
A0A075B6R9	Protein IGKV2D-24 (Fragment) OS=Homo sapiens GN=IGKV2D-24 PE=4 SV=1	10.8333	1	120	13.1		0.585
B2RUZ4	Small integral membrane protein 1 OS=Homo sapiens GN=SMIM1 PE=1 SV=1	20.5128	1	78	8.7		0.585
P01718	Immunoglobulin lambda variable 3-27 OS=Homo sapiens GN=IGLV3-27 PE=1 SV=2	8.84956	1	113	12.2		0.585
Q8IZD7	Anti-thyroglobulin heavy chain variable region (Fragment) OS=Homo sapiens PE=2 SV=1	6.92308	1	130	13.9		0.585
Q6ZNX5	cDNA FLJ26936 fis, clone RCT06808 OS=Homo sapiens PE=2 SV=1	4.84848	1	165	17.7		0.585
A0A075B6K0	Immunoglobulin lambda variable 3-16 OS=Homo sapiens GN=IGLV3-16 PE=3 SV=2	8.69565	1	115	12.5		0.585
A0A1C9J6Q9	B cell receptor kappa chain variable region (Fragment) OS=Homo sapiens PE=4 SV=1	16.8224	1	107	11.7		0.585
A0A0X9V9D6	IBM-B2 light chain variable region (Fragment) OS=Homo sapiens PE=2 SV=1	8.49057	1	106	11.4		0.585
A0A1C9J6R6	B cell receptor kappa chain variable region (Fragment) OS=Homo sapiens PE=4 SV=1	16.8224	1	107	11.6	Phospho [T5; S10]	0.585
P12110-2	Isoform 2C2A of Collagen alpha-2(VI) chain OS=Homo sapiens GN=COL6A2	10.5664	1	918	97.4		0.573
B3KS49	cDNA FLJ35478 fis, clone SMINT2007796, highly similar to Gelsolin OS=Homo sapiens PE=2 SV=1	14.2268	1	485	52.3		0.557
P62879	Guanine nucleotide-binding protein G(I)/G(S)/G(T) subunit beta-2 OS=Homo sapiens GN=GNB2 PE=1 SV=3	9.70588	1	340	37.3		0.54
B4DEE8	cDNA FLJ56323, highly similar to Methylated-DNA--protein-cysteinemethyltransferase (EC 2.1.1.63) OS=Homo sapiens PE=2 SV=1	10.084	1	238	25		0.468
A2NYU8	Heavy chain Fab (Fragment) OS=Homo sapiens PE=2 SV=1	13.7931	1	116	12.7		0.468
A0A0B4J2D9	Immunoglobulin kappa variable 1D-13 OS=Homo sapiens GN=IGKV1D-13 PE=3 SV=1	13.6752	1	117	12.6		0.468
A0A0C4DH26	Protein IGKV6D-41 (Fragment) OS=Homo sapiens GN=IGKV6D-41 PE=4 SV=1	10.4348	1	115	12.6		0.468
A0A0F7T931	IGHV4-39 protein (Fragment) OS=Homo sapiens GN=IGHV4-39 PE=4 SV=1	15.2381	1	105	11.6		0.468
Q0P5N8	TMSB4X protein (Fragment) OS=Homo sapiens GN=TMSB4X PE=2 SV=1	18.5714	1	70	7.8		0.468
A0A068LN17	Ig heavy chain variable region (Fragment) OS=Homo sapiens PE=2 SV=1	15.7025	1	121	13.3		0.468
A0A193CHS1	10E8 light chain variable region (Fragment) OS=Homo sapiens PE=2 SV=1	8.25688	1	109	11.6		0.468
A0A024R371	PRA1 family protein OS=Homo sapiens GN=ARL6IP5 PE=3 SV=1	5.85106	1	188	21.6		0.468
A0A0X9T0I7	IBM-A2 light chain variable region (Fragment) OS=Homo sapiens PE=2 SV=1	7.9646	1	113	12.2		0.468
Q9BV40	Vesicle-associated membrane protein 8 OS=Homo sapiens GN=VAMP8 PE=1 SV=1	14	1	100	11.4		0.468
Q549J4	Erythroid associated factor OS=Homo sapiens GN=ERAF PE=2 SV=1	12.7451	1	102	11.8		0.468
A0A068LRW6	Ig heavy chain variable region (Fragment) OS=Homo sapiens PE=2 SV=1	5.51181	1	127	14		0.468
P07360	Complement component C8 gamma chain OS=Homo sapiens GN=C8G PE=1 SV=3	7.42574	1	202	22.3		0.425
A0A0C4DFY5	G-protein-coupled receptor family C group 5 member C OS=Homo sapiens GN=GPRC5C PE=1 SV=1	8.02469	1	486	52.9		0.413
A0A0C4DH39	Immunoglobulin heavy variable 1-58 OS=Homo sapiens GN=IGHV1-58 PE=3 SV=1	12.8205	1	117	13		0.389
A2NW98	Rheumatoid factor light chain variable region (Fragment) OS=Homo sapiens PE=2 SV=1	6.71642	1	134	14.8		0.389
Q14761	Protein tyrosine phosphatase receptor type C-associated protein OS=Homo sapiens GN=PTPRCAP PE=1 SV=1	3.8835	1	206	21.2		0.389
A0A0X9SZU9	MS-B1 heavy chain variable region (Fragment) OS=Homo sapiens PE=2 SV=1	5.46875	1	128	14.2		0.389
P31151	Protein S100-A7 OS=Homo sapiens GN=S100A7 PE=1 SV=4	11.8812	1	101	11.5		0.389
K7EPF9	Apolipoprotein C-I OS=Homo sapiens GN=APOC1 PE=1 SV=1	6.97674	1	129	14.3		0.389
Q9UL86	Myosin-reactive immunoglobulin kappa chain variable region (Fragment) OS=Homo sapiens PE=2 SV=1	8.25688	1	109	11.9		0.389
A2MYC9	V4-3 protein (Fragment) OS=Homo sapiens GN=V4-3 PE=4 SV=1	18.2692	1	104	11.3		0.389
A0A024R845	RAB14, member RAS oncogene family, isoform CRA_a OS=Homo sapiens GN=RAB14 PE=4 SV=1	11.6279	1	215	23.9		0.359
A0A075B7D0	Protein IGHV1OR15-1 (Fragment) OS=Homo sapiens GN=IGHV1OR15-1 PE=1 SV=1	12.8205	1	117	13		0.334
B2RC09	cDNA, FLJ95794, highly similar to Homo sapiens apolipoprotein F (APOF), mRNA OS=Homo sapiens PE=2 SV=1	4.29448	1	326	35.4		0.334
P14770	Platelet glycoprotein IX OS=Homo sapiens GN=GP9 PE=1 SV=3	5.08475	1	177	19		0.334
B2R4M6	Protein S100 OS=Homo sapiens PE=2 SV=1	11.4035	1	114	13.2		0.334
A2N2F4	VK3 protein (Fragment) OS=Homo sapiens GN=VK3 PE=2 SV=1	8.33333	1	108	11.9		0.334
Q53FH6	Mitogen-activated protein kinase kinase 1 interacting protein 1 variant (Fragment) OS=Homo sapiens PE=2 SV=1	8.06452	1	124	13.6		0.334
O76096	Cystatin-F OS=Homo sapiens GN=CST7 PE=1 SV=1	4.82759	1	145	16.4		0.334
A6XMH4	Beta-2-microglobulin OS=Homo sapiens PE=2 SV=1	10.4839	1	124	14.4		0.334
M0R091	Zinc finger protein 671 OS=Homo sapiens GN=ZNF671 PE=4 SV=1	16.8224	1	107	11		0.334
K7N7A8	Uncharacterized protein (Fragment) OS=Homo sapiens PE=3 SV=2	4.45434	1	449	48.8		0.292
A0A140VK92	Secretory carrier-associated membrane protein OS=Homo sapiens PE=2 SV=1	3.64742	1	329	36.6		0.292
B0YIY4	CD3d antigen, delta polypeptide (TiT3 complex), isoform CRA_a OS=Homo sapiens GN=CD3D PE=2 SV=1	7.01754	1	171	18.9		0.292
Q53H37	Calmodulin-like skin protein variant (Fragment) OS=Homo sapiens PE=2 SV=1	7.53425	1	146	15.9		0.292
P62330	ADP-ribosylation factor 6 OS=Homo sapiens GN=ARF6 PE=1 SV=2	6.28571	1	175	20.1		0.292
E7DVW4	Epididymis secretory protein Li 104 OS=Homo sapiens GN=FABP4 PE=2 SV=1	6.81818	1	132	14.7		0.292
P09382	Galectin-1 OS=Homo sapiens GN=LGALS1 PE=1 SV=2	5.92593	1	135	14.7		0.292
Q01469	Fatty acid-binding protein, epidermal OS=Homo sapiens GN=FABP5 PE=1 SV=3	6.66667	1	135	15.2		0.259
A0A0A0MQS8	Ammonium transporter Rh type A OS=Homo sapiens GN=RHAG PE=1 SV=1	2.19512	1	410	44.3		0.259
H3BPH4	Phosphomannomutase (Fragment) OS=Homo sapiens GN=PMM2 PE=1 SV=1	8.4507	1	142	16.3	Phospho [T7; T9]	0.259
Q8IXJ5	Glycoprotein nmb-like protein OS=Homo sapiens GN=GPNMB PE=2 SV=1	3.8835	1	206	24		0.259
K7ES00	Histone H3.3 (Fragment) OS=Homo sapiens GN=H3F3B PE=1 SV=1	4.63576	1	151	16.6		0.259
Q5U077	L-lactate dehydrogenase OS=Homo sapiens GN=LDHB PE=2 SV=1	6.58683	1	334	36.6		0.245
A0A0A0MT26	Sodium/potassium-transporting ATPase subunit alpha-3 OS=Homo sapiens GN=ATP1A3 PE=1 SV=1	6.11746	1	1226	133.2		0.238
B2R9T9	cDNA, FLJ94551 OS=Homo sapiens PE=2 SV=1	4.93827	1	243	26.2		0.233
P30043	Flavin reductase (NADPH) OS=Homo sapiens GN=BLVRB PE=1 SV=3	7.28155	1	206	22.1		0.233
B4E1U9	cDNA FLJ54776, highly similar to Cell division control protein 42 homolog OS=Homo sapiens PE=2 SV=1	4.23729	1	236	26.5		0.233
A0A0U1RRH7	Histone H2A OS=Homo sapiens PE=3 SV=1	5.29412	1	170	18.5		0.233
J3KQE5	GTP-binding nuclear protein Ran (Fragment) OS=Homo sapiens GN=RAN PE=1 SV=1	4.70085	1	234	26.8		0.233
Q04695	Keratin, type I cytoskeletal 17 OS=Homo sapiens GN=KRT17 PE=1 SV=2	5.78704	1	432	48.1		0.218
D9IAI1	Epididymis secretory protein Li 34 OS=Homo sapiens GN=PEBP1 PE=2 SV=1	7.48663	1	187	21		0.212
B2R773	cDNA, FLJ93312, highly similar to Homo sapiens adipose most abundant gene transcript 1 (APM1), mRNA OS=Homo sapiens PE=2 SV=1	6.14754	1	244	26.4		0.212
O15511-2	Isoform 2 of Actin-related protein 2/3 complex subunit 5 OS=Homo sapiens GN=ARPC5	7.79221	1	154	16.6		0.212
Q3ZCW2	Galectin-related protein OS=Homo sapiens GN=LGALSL PE=1 SV=2	6.39535	1	172	19		0.212
P10114	Ras-related protein Rap-2a OS=Homo sapiens GN=RAP2A PE=1 SV=1	5.46448	1	183	20.6		0.212
Q5JXB2	Putative ubiquitin-conjugating enzyme E2 N-like OS=Homo sapiens GN=UBE2NL PE=1 SV=1	7.18954	1	153	17.4		0.212
Q86YW5	Trem-like transcript 1 protein OS=Homo sapiens GN=TREML1 PE=1 SV=2	5.14469	1	311	32.7		0.212
P11234-2	Isoform 2 of Ras-related protein Ral-B OS=Homo sapiens GN=RALB	7.01754	1	228	26		0.212
B2R679	cDNA, FLJ92825, highly similar to Homo sapiens SAR1a gene homolog 1 (S. cerevisiae) (SARA1), mRNA OS=Homo sapiens PE=2 SV=1	5.55556	1	198	22.3		0.212
A8K3I0	cDNA FLJ78437, highly similar to Homo sapiens cartilage oligomeric matrix protein (COMP), mRNA OS=Homo sapiens PE=2 SV=1	5.15192	1	757	82.8		0.205
Q14344	Guanine nucleotide-binding protein subunit alpha-13 OS=Homo sapiens GN=GNA13 PE=1 SV=2	4.77454	1	377	44		0.202
F5H423	Uncharacterized protein OS=Homo sapiens PE=3 SV=1	6.66667	1	210	23.3		0.194
P28906	Hematopoietic progenitor cell antigen CD34 OS=Homo sapiens GN=CD34 PE=1 SV=2	7.53247	1	385	40.7		0.194
P28072	Proteasome subunit beta type-6 OS=Homo sapiens GN=PSMB6 PE=1 SV=4	4.60251	1	239	25.3		0.194
P22352	Glutathione peroxidase 3 OS=Homo sapiens GN=GPX3 PE=1 SV=2	5.30973	1	226	25.5		0.194
H3BN62	Breast cancer anti-estrogen resistance protein 1 (Fragment) OS=Homo sapiens GN=BCAR1 PE=1 SV=1	7.14286	1	238	25.6		0.194
O95445	Apolipoprotein M OS=Homo sapiens GN=APOM PE=1 SV=2	3.7234	1	188	21.2		0.194
Q99497	Protein deglycase DJ-1 OS=Homo sapiens GN=PARK7 PE=1 SV=2	4.2328	1	189	19.9		0.194
P30044	Peroxiredoxin-5, mitochondrial OS=Homo sapiens GN=PRDX5 PE=1 SV=4	3.73832	1	214	22.1		0.194
Q9NZP8	Complement C1r subcomponent-like protein OS=Homo sapiens GN=C1RL PE=1 SV=2	4.31211	1	487	53.5		0.186
P60201	Myelin proteolipid protein OS=Homo sapiens GN=PLP1 PE=1 SV=2	4.69314	1	277	30.1		0.179
A0A096LPE2	Protein SAA2-SAA4 OS=Homo sapiens GN=SAA2-SAA4 PE=4 SV=1	5.28846	1	208	23.3		0.179
A8K0C2	cDNA FLJ75950 OS=Homo sapiens PE=2 SV=1	5.49451	1	273	28.8		0.179
P30048	Thioredoxin-dependent peroxide reductase, mitochondrial OS=Homo sapiens GN=PRDX3 PE=1 SV=3	4.29688	1	256	27.7		0.179
P62917	60S ribosomal protein L8 OS=Homo sapiens GN=RPL8 PE=1 SV=2	4.28016	1	257	28		0.179
M9MML0	Fc of IgG low affinity IIIa receptor isoform 1 OS=Homo sapiens GN=FCGR3A PE=1 SV=1	3.7931	1	290	32.7		0.179
O14495	Phospholipid phosphatase 3 OS=Homo sapiens GN=PLPP3 PE=1 SV=1	3.53698	1	311	35.1		0.179
B7Z1F9	Glutathione S-transferase OS=Homo sapiens PE=2 SV=1	4	1	225	25.6		0.179
P48509	CD151 antigen OS=Homo sapiens GN=CD151 PE=1 SV=3	3.55731	1	253	28.3		0.179
P35443	Thrombospondin-4 OS=Homo sapiens GN=THBS4 PE=1 SV=2	4.47451	1	961	105.8		0.174
A0A0G2JJG8	Protein G6b OS=Homo sapiens GN=C6orf25 PE=1 SV=1	5.39419	1	241	26		0.166
D3DTP7	Phospholipid scramblase OS=Homo sapiens GN=hCG_1987383 PE=3 SV=1	3.42857	1	350	37.7		0.166
B2R4F3	cDNA, FLJ92068, highly similar to Homo sapiens Rho GDP dissociation inhibitor (GDI) beta (ARHGDIB),mRNA OS=Homo sapiens PE=2 SV=1	6.46766	1	201	22.9		0.166
Q96HU8	GTP-binding protein Di-Ras2 OS=Homo sapiens GN=DIRAS2 PE=1 SV=1	5.52764	1	199	22.5		0.166
P21730	C5a anaphylatoxin chemotactic receptor 1 OS=Homo sapiens GN=C5AR1 PE=1 SV=2	2.85714	1	350	39.3		0.166
Q08722	Leukocyte surface antigen CD47 OS=Homo sapiens GN=CD47 PE=1 SV=1	2.47678	1	323	35.2		0.166
Q96NT5	Proton-coupled folate transporter OS=Homo sapiens GN=SLC46A1 PE=1 SV=1	2.83224	1	459	49.7		0.155
Q9NZN3	EH domain-containing protein 3 OS=Homo sapiens GN=EHD3 PE=1 SV=2	3.73832	1	535	60.8		0.155
Q5T9B7	Adenylate kinase isoenzyme 1 OS=Homo sapiens GN=AK1 PE=1 SV=1	5.71429	1	210	23.4		0.155
P14151-2	Isoform 2 of L-selectin OS=Homo sapiens GN=SELL	4.67532	1	385	43.6		0.155
B2R983	cDNA, FLJ94267, highly similar to Homo sapiens glutathione S-transferase omega 1 (GSTO1), mRNA OS=Homo sapiens PE=2 SV=1	4.14938	1	241	27.5		0.155
P08311	Cathepsin G OS=Homo sapiens GN=CTSG PE=1 SV=2	3.52941	1	255	28.8		0.155
J3KPD9	Protein NME1-NME2 OS=Homo sapiens GN=NME1-NME2 PE=1 SV=1	8.62944	1	197	22.4		0.155
B7Z831	cDNA FLJ55176, highly similar to G-protein coupled receptor family C group 5 member B OS=Homo sapiens PE=2 SV=1	2.7972	1	429	47.7		0.145
Q6FIC5	Chloride intracellular channel protein OS=Homo sapiens GN=CLIC4 PE=2 SV=1	6.32411	1	253	28.8		0.145
A0A0C4DGQ5	Calpain small subunit 1 OS=Homo sapiens GN=CAPNS1 PE=1 SV=1	2.17391	1	322	33.8		0.145
O00602	Ficolin-1 OS=Homo sapiens GN=FCN1 PE=1 SV=2	4.29448	1	326	35.1		0.136
O75558	Syntaxin-11 OS=Homo sapiens GN=STX11 PE=1 SV=1	3.13589	1	287	33.2		0.136
A0A0A8LE32	MHC class II antigen OS=Homo sapiens GN=HLA-DRB1 PE=2 SV=1	3.7594	1	266	29.9		0.136
Q5CCG7	Rhesus blood group D antigen OS=Homo sapiens GN=RHD PE=4 SV=1	1.84426	1	488	53.2		0.136
K7ERQ8	Uncharacterized protein (Fragment) OS=Homo sapiens PE=4 SV=1	3.90071	1	282	31.4		0.136
A0A024QZI2	HCG1998059, isoform CRA_a OS=Homo sapiens GN=hCG_1998059 PE=4 SV=1	1.91781	1	365	39.7		0.136
Q5JWF2	Guanine nucleotide-binding protein G(s) subunit alpha isoforms XLas OS=Homo sapiens GN=GNAS PE=1 SV=2	2.02507	1	1037	111		0.133
P02749	Beta-2-glycoprotein 1 OS=Homo sapiens GN=APOH PE=1 SV=3	4.92754	1	345	38.3		0.129
O15143	Actin-related protein 2/3 complex subunit 1B OS=Homo sapiens GN=ARPC1B PE=1 SV=3	1.88172	1	372	40.9		0.129
B7Z6L9	cDNA FLJ54755, highly similar to Vacuolar ATP synthase subunit d (EC 3.6.3.14) OS=Homo sapiens PE=2 SV=1	2.80612	1	392	44.6		0.122
B2R888	Monocyte differentiation antigen CD14 OS=Homo sapiens PE=2 SV=1	5.06667	1	375	40		0.122
P02686	Myelin basic protein OS=Homo sapiens GN=MBP PE=1 SV=3	3.94737	1	304	33.1		0.116
P54920	Alpha-soluble NSF attachment protein OS=Homo sapiens GN=NAPA PE=1 SV=3	4.40678	1	295	33.2		0.116
V9HWD8	Epididymis secretory sperm binding protein Li 163pA OS=Homo sapiens GN=HEL-S-163pA PE=2 SV=1	1.61616	1	495	54.2		0.116
P17936-2	Isoform 2 of Insulin-like growth factor-binding protein 3 OS=Homo sapiens GN=IGFBP3	2.6936	1	297	32.2		0.116
Q00325	Phosphate carrier protein, mitochondrial OS=Homo sapiens GN=SLC25A3 PE=1 SV=2	3.31492	1	362	40.1		0.116
A0A059RXE4	NADH-ubiquinone oxidoreductase chain 5 OS=Homo sapiens GN=ND5 PE=3 SV=1	2.48756	1	603	67	Phospho [Y174]	0.116
Q6NTG0	SLC9A3R2 protein (Fragment) OS=Homo sapiens GN=SLC9A3R2 PE=2 SV=1	3.49462	1	372	40.6		0.11
Q9Y315	Deoxyribose-phosphate aldolase OS=Homo sapiens GN=DERA PE=1 SV=2	3.77358	1	318	35.2		0.11
Q59ES3	Amino acid transporter (Fragment) OS=Homo sapiens PE=2 SV=1	2.37226	1	548	57.4		0.11
B7Z8Q2	cDNA FLJ55606, highly similar to Alpha-2-HS-glycoprotein OS=Homo sapiens PE=2 SV=1	4.84988	1	433	46.6		0.11
B4DWA6	cDNA FLJ60094, highly similar to F-actin capping protein subunit beta OS=Homo sapiens PE=2 SV=1	2.98507	1	335	37.5		0.11
P35247	Pulmonary surfactant-associated protein D OS=Homo sapiens GN=SFTPD PE=1 SV=3	4	1	375	37.7		0.11
B2RAY1	cDNA, FLJ95184, highly similar to Homo sapiens signal transducing adaptor molecule (SH3 domain and ITAM motif) 1 (STAM), mRNA OS=Homo sapiens PE=2 SV=1	2.22222	1	540	59.1		0.11
Q9UGM5	Fetuin-B OS=Homo sapiens GN=FETUB PE=1 SV=2	2.09424	1	382	42		0.11
P61160-2	Isoform 2 of Actin-related protein 2 OS=Homo sapiens GN=ACTR2	3.50877	1	399	45.3		0.11
O95498	Vascular non-inflammatory molecule 2 OS=Homo sapiens GN=VNN2 PE=1 SV=3	2.5	1	520	58.5		0.11
O15144	Actin-related protein 2/3 complex subunit 2 OS=Homo sapiens GN=ARPC2 PE=1 SV=1	3	1	300	34.3		0.105
P11279	Lysosome-associated membrane glycoprotein 1 OS=Homo sapiens GN=LAMP1 PE=1 SV=3	2.15827	1	417	44.9		0.105
Q59ED3	Intercellular adhesion molecule 2 variant (Fragment) OS=Homo sapiens PE=2 SV=1	2.90698	1	344	38.4		0.105
A0A0J9YXC7	LIM and senescent cell antigen-like-containing domain protein OS=Homo sapiens GN=LIMS4 PE=1 SV=1	3.01508	1	398	45.7		0.101
Q14240-2	Isoform 2 of Eukaryotic initiation factor 4A-II OS=Homo sapiens GN=EIF4A2	2.45098	1	408	46.5		0.101
B0QZ18	Copine-1 OS=Homo sapiens GN=CPNE1 PE=1 SV=1	1.66052	1	542	59.7		0.101
A0A0S2Z471	Creatine kinase brain isoform 2 (Fragment) OS=Homo sapiens GN=CKB PE=2 SV=1	2.71605	1	405	44.9		0.096
Q9BR76	Coronin-1B OS=Homo sapiens GN=CORO1B PE=1 SV=1	2.04499	1	489	54.2		0.096
Q92187	CMP-N-acetylneuraminate-poly-alpha-2,8-sialyltransferase OS=Homo sapiens GN=ST8SIA4 PE=1 SV=1	3.62117	1	359	41.3		0.096
P40925-3	Isoform 3 of Malate dehydrogenase, cytoplasmic OS=Homo sapiens GN=MDH1	3.40909	1	352	38.6		0.096
A0A024R4K3	Malate dehydrogenase OS=Homo sapiens GN=MDH2 PE=2 SV=1	3.25444	1	338	35.5		0.096
B4DT57	cDNA FLJ61383, highly similar to Serine/threonine-protein kinase 24 (EC 2.7.11.1) OS=Homo sapiens PE=2 SV=1	1.55556	1	450	50		0.096
D3DRP5	Chromosome 9 open reading frame 19, isoform CRA_a (Fragment) OS=Homo sapiens GN=C9orf19 PE=4 SV=1	3.7037	1	351	37.8		0.093
V9HWE0	Annexin OS=Homo sapiens GN=HEL-S-7 PE=2 SV=1	2.8125	1	320	35.9		0.093
A0A024RDQ9	Solute carrier family 7 (Cationic amino acid transporter, y+ system), member 1, isoform CRA_a OS=Homo sapiens GN=SLC7A1 PE=4 SV=1	1.74881	1	629	67.6		0.093
B2RAN2	cDNA, FLJ95014, highly similar to Homo sapiens vanin 1 (VNN1), mRNA OS=Homo sapiens PE=2 SV=1	3.31384	1	513	57		0.089
A0A024R0K5	Carcinoembryonic antigen-related cell adhesion molecule 5 OS=Homo sapiens GN=CEACAM5 PE=1 SV=1	1.28205	1	702	76.7		0.089
B5MDU3	Pleckstrin homology domain-containing family A member 8 OS=Homo sapiens GN=PLEKHA8 PE=1 SV=1	3.64465	1	439	49.3	Phospho [T431; S434]	0.089
B2R6A3	Na(+)/H(+) exchange regulatory cofactor NHE-RF OS=Homo sapiens PE=2 SV=1	3.91061	1	358	38.9		0.089
Q5VW32	BRO1 domain-containing protein BROX OS=Homo sapiens GN=BROX PE=1 SV=1	2.6764	1	411	46.4		0.089
Q7Z4X0	MO25-like protein OS=Homo sapiens PE=2 SV=1	2.05279	1	341	39.7		0.089
B7Z6L0	Annexin OS=Homo sapiens PE=2 SV=1	1.4876	1	605	65.6		0.086
Q96RF0	Sorting nexin-18 OS=Homo sapiens GN=SNX18 PE=1 SV=2	1.91083	1	628	68.9		0.086
B2R736	cDNA, FLJ93263, highly similar to Homo sapiens intercellular adhesion molecule 3 (ICAM3), mRNA OS=Homo sapiens PE=2 SV=1	1.82815	1	547	59.5		0.086
Q8NCQ5	F-box only protein 15 OS=Homo sapiens GN=FBXO15 PE=2 SV=2	1.56863	1	510	57.2		0.086
Q9UHG3	Prenylcysteine oxidase 1 OS=Homo sapiens GN=PCYOX1 PE=1 SV=3	1.58416	1	505	56.6		0.083
A0A0A0MTH3	Integrin-linked protein kinase OS=Homo sapiens GN=ILK PE=1 SV=1	1.86335	1	483	54.6		0.083
B4DLV7	Rab GDP dissociation inhibitor OS=Homo sapiens PE=2 SV=1	2.67261	1	449	51.1		0.08
Q14CR0	ATP-binding cassette, sub-family G (WHITE), member 8 OS=Homo sapiens GN=ABCG8 PE=2 SV=1	1.48588	1	673	75.6		0.08
Q9NUG4	Cerebral cavernous malformations 2 protein-like OS=Homo sapiens GN=CCM2L PE=2 SV=3	1.92644	1	571	62.1		0.08
Q00013	55 kDa erythrocyte membrane protein OS=Homo sapiens GN=MPP1 PE=1 SV=2	2.57511	1	466	52.3		0.08
Q96PD5-2	Isoform 2 of N-acetylmuramoyl-L-alanine amidase OS=Homo sapiens GN=PGLYRP2	1.26183	1	634	68		0.08
Q53HQ0	Flotillin 1 variant (Fragment) OS=Homo sapiens PE=2 SV=1	2.57611	1	427	47.3		0.077
J3QRU1	Tyrosine-protein kinase OS=Homo sapiens GN=YES1 PE=1 SV=1	2.37226	1	548	61.3		0.077
G3V2W1	Protein Z-dependent protease inhibitor OS=Homo sapiens GN=SERPINA10 PE=1 SV=1	2.06612	1	484	55.1		0.077
P07357	Complement component C8 alpha chain OS=Homo sapiens GN=C8A PE=1 SV=2	1.71233	1	584	65.1		0.077
P49411	Elongation factor Tu, mitochondrial OS=Homo sapiens GN=TUFM PE=1 SV=2	3.09735	1	452	49.5		0.075
Q8TB73	Protein NDNF OS=Homo sapiens GN=NDNF PE=1 SV=2	1.40845	1	568	64.6		0.075
P09543	2',3'-cyclic-nucleotide 3'-phosphodiesterase OS=Homo sapiens GN=CNP PE=1 SV=2	2.13777	1	421	47.5		0.075
Q8NFH9	MLL/SEPTIN6 fusion protein (Fragment) OS=Homo sapiens PE=2 SV=1	1.61002	1	559	63.1		0.075
P23634	Plasma membrane calcium-transporting ATPase 4 OS=Homo sapiens GN=ATP2B4 PE=1 SV=2	2.09508	1	1241	137.8		0.072
A6NMB1	Sialic acid-binding Ig-like lectin 16 OS=Homo sapiens GN=SIGLEC16 PE=2 SV=3	1.4553	1	481	53		0.072
B2RDY9	Adenylyl cyclase-associated protein OS=Homo sapiens PE=2 SV=1	2.73684	1	475	51.6		0.072
P30101	Protein disulfide-isomerase A3 OS=Homo sapiens GN=PDIA3 PE=1 SV=4	2.17822	1	505	56.7		0.072
A8K2N0	cDNA FLJ77835, highly similar to Homo sapiens complement component 1, s subcomponent (C1S), transcript variant 2, mRNA OS=Homo sapiens PE=2 SV=1	1.59884	1	688	76.6		0.07
P16070	CD44 antigen OS=Homo sapiens GN=CD44 PE=1 SV=3	1.34771	1	742	81.5		0.07
P20020	Plasma membrane calcium-transporting ATPase 1 OS=Homo sapiens GN=ATP2B1 PE=1 SV=3	2.46423	1	1258	138.7		0.069
E7EMK3	Flotillin-2 OS=Homo sapiens GN=FLOT2 PE=1 SV=1	2.69151	1	483	53.1		0.068
Q14247-2	Isoform 2 of Src substrate cortactin OS=Homo sapiens GN=CTTN	3.15457	1	634	70.9		0.068
A0A0C4DH47	Thromboxane-A synthase OS=Homo sapiens GN=TBXAS1 PE=1 SV=1	1.72414	1	580	65.7		0.066
Q5T3F8	CSC1-like protein 2 OS=Homo sapiens GN=TMEM63B PE=1 SV=1	1.08173	1	832	94.9		0.066
P33908	Mannosyl-oligosaccharide 1,2-alpha-mannosidase IA OS=Homo sapiens GN=MAN1A1 PE=1 SV=3	1.68453	1	653	72.9		0.064
D3DNN4	Carboxylic ester hydrolase OS=Homo sapiens GN=BCHE PE=3 SV=1	1.71073	1	643	72.8		0.064
Q9UBL6	Copine-7 OS=Homo sapiens GN=CPNE7 PE=1 SV=1	1.4218	1	633	70.2		0.064
B1AHL2	Fibulin-1 OS=Homo sapiens GN=FBLN1 PE=1 SV=1	1.52566	1	721	78.3		0.062
P29350-4	Isoform 4 of Tyrosine-protein phosphatase non-receptor type 6 OS=Homo sapiens GN=PTPN6	1.92308	1	624	70.1		0.058
Q15833-3	Isoform 3 of Syntaxin-binding protein 2 OS=Homo sapiens GN=STXBP2	1.15894	1	604	67.7		0.058
P18054	Arachidonate 12-lipoxygenase, 12S-type OS=Homo sapiens GN=ALOX12 PE=1 SV=4	1.80995	1	663	75.6		0.058
Q9UGM3-9	Isoform 9 of Deleted in malignant brain tumors 1 protein OS=Homo sapiens GN=DMBT1	2.47132	1	1133	124.4		0.056
P16452-2	Isoform Long of Erythrocyte membrane protein band 4.2 OS=Homo sapiens GN=EPB42	2.49653	1	721	79.9		0.056
P51790-2	Isoform 2 of H(+)/Cl(-) exchange transporter 3 OS=Homo sapiens GN=CLCN3	0.923788	1	866	96.7		0.056
A8K973	cDNA FLJ77998, highly similar to Homo sapiens synaptotagmin-like 4 (granuphilin-a), mRNA OS=Homo sapiens PE=2 SV=1	1.78838	1	671	75.9		0.056
P61764-2	Isoform 2 of Syntaxin-binding protein 1 OS=Homo sapiens GN=STXBP1	2.15589	1	603	68.7		0.054
P19320	Vascular cell adhesion protein 1 OS=Homo sapiens GN=VCAM1 PE=1 SV=1	1.4885	1	739	81.2		0.054
O14786	Neuropilin-1 OS=Homo sapiens GN=NRP1 PE=1 SV=3	1.40845	1	923	103.1		0.054
Q8TDJ5	Tyrosine-protein kinase receptor OS=Homo sapiens GN=TFG/ALK fusion PE=2 SV=1	1.24533	1	803	88.6		0.053
B7Z2A4	Receptor-type tyrosine-protein phosphatase OS=Homo sapiens PE=2 SV=1	1.59902	1	813	91.9		0.053
Q12929	Epidermal growth factor receptor kinase substrate 8 OS=Homo sapiens GN=EPS8 PE=1 SV=1	1.94647	1	822	91.8		0.053
G3V5N8	Zinc finger FYVE domain-containing protein 1 OS=Homo sapiens GN=ZFYVE1 PE=1 SV=1	1.52091	1	789	88.4		0.051
A8KA38	cDNA FLJ78063, highly similar to Homo sapiens ectonucleotide pyrophosphatase/phosphodiesterase 3 (ENPP3), mRNA OS=Homo sapiens PE=2 SV=1	1.25714	1	875	100.1		0.049
Q04609	Glutamate carboxypeptidase 2 OS=Homo sapiens GN=FOLH1 PE=1 SV=1	1.2	1	750	84.3		0.048
A0A0C4DFX3	EMILIN-1 OS=Homo sapiens GN=EMILIN1 PE=1 SV=1	1.5748	1	1016	106.6		0.047
B4DIU9	cDNA FLJ56625, highly similar to Mus musculus armadillo repeat containing 5 (Armc5), mRNA OS=Homo sapiens PE=2 SV=1	0.776699	1	1030	107.9		0.046
P05164-3	Isoform H7 of Myeloperoxidase OS=Homo sapiens GN=MPO	1.5444	1	777	87.2		0.045
P13639	Elongation factor 2 OS=Homo sapiens GN=EEF2 PE=1 SV=4	1.1655	1	858	95.3		0.044
Q14644	Ras GTPase-activating protein 3 OS=Homo sapiens GN=RASA3 PE=1 SV=3	1.31894	1	834	95.6		0.044
Q9Y2I9	TBC1 domain family member 30 OS=Homo sapiens GN=TBC1D30 PE=1 SV=2	0.865801	1	924	102.7		0.043
P54760	Ephrin type-B receptor 4 OS=Homo sapiens GN=EPHB4 PE=1 SV=2	1.01317	1	987	108.2		0.041
Q86SQ4-3	Isoform 3 of Adhesion G-protein coupled receptor G6 OS=Homo sapiens GN=ADGRG6	0.64	1	1250	139.8		0.04
Q16706	Alpha-mannosidase 2 OS=Homo sapiens GN=MAN2A1 PE=1 SV=2	0.961538	1	1144	131.1		0.039
Q9UQ16-4	Isoform 4 of Dynamin-3 OS=Homo sapiens GN=DNM3	1.14548	1	873	98.1		0.039
Q27J81	Inverted formin-2 OS=Homo sapiens GN=INF2 PE=1 SV=2	0.640512	1	1249	135.5		0.038
Q9BXX0	EMILIN-2 OS=Homo sapiens GN=EMILIN2 PE=1 SV=3	1.23457	1	1053	115.6		0.036
A0A1B0GV02	Zinc finger E-box-binding homeobox 2 OS=Homo sapiens GN=ZEB2 PE=1 SV=1	1.04923	1	1239	139.1		0.036
Q86V37	TAOK2 protein (Fragment) OS=Homo sapiens GN=TAOK2 PE=2 SV=1	0.631136	1	1426	158.9		0.032
Q92887	Canalicular multispecific organic anion transporter 1 OS=Homo sapiens GN=ABCC2 PE=1 SV=3	0.582524	1	1545	174.1		0.032
A6H8V1	Slit homolog 1 (Drosophila) OS=Homo sapiens GN=SLIT1 PE=2 SV=1	0.521512	1	1534	167.8		0.032
B3KXB6	cDNA FLJ45101 fis, clone BRAWH3032298, highly similar to Tenascin-N OS=Homo sapiens PE=2 SV=1	1.00077	1	1299	143.8		0.03
P39060	Collagen alpha-1(XVIII) chain OS=Homo sapiens GN=COL18A1 PE=1 SV=5	0.513113	1	1754	178.1		0.03
B3KWV6	cDNA FLJ43948 fis, clone TESTI4014924, highly similar to Homo sapiens cytoplasmic FMR1 interacting protein 1 (CYFIP1), transcript variant 1, mRNA OS=Homo sapiens PE=2 SV=1	0.876494	1	1255	145.4		0.03
Q6ZV29-5	Isoform 5 of Patatin-like phospholipase domain-containing protein 7 OS=Homo sapiens GN=PNPLA7	0.596125	1	1342	148.4		0.029
Q9NYU2	UDP-glucose:glycoprotein glucosyltransferase 1 OS=Homo sapiens GN=UGGT1 PE=1 SV=3	0.707395	1	1555	177.1		0.027
A0A087WYN9	ATP-dependent RNA helicase DHX29 OS=Homo sapiens GN=DHX29 PE=1 SV=1	0.656934	1	1370	155.2		0.027
P08572	Collagen alpha-2(IV) chain OS=Homo sapiens GN=COL4A2 PE=1 SV=4	0.700935	1	1712	167.4		0.024
Q99715	Collagen alpha-1(XII) chain OS=Homo sapiens GN=COL12A1 PE=1 SV=2	0.326477	1	3063	332.9		0.014
Q86WI1	Fibrocystin-L OS=Homo sapiens GN=PKHD1L1 PE=2 SV=2	0.235682	1	4243	465.4		0.012
A0A087WVP1	Protocadherin Fat 1 OS=Homo sapiens GN=FAT1 PE=1 SV=1	0.196078	1	4590	506.1		0.011
Q8IZT6	Abnormal spindle-like microcephaly-associated protein OS=Homo sapiens GN=ASPM PE=1 SV=2	0.373886	1	3477	409.5	Phospho [T2194]	0.01
H0YHX7	Neuron navigator 3 (Fragment) OS=Homo sapiens GN=NAV3 PE=1 SV=1	5.15021	1	233	24.8		0

## Sheet: Supplementary File 1b
Accession	Description	Coverage	# Unique Peptides	# AAs	MW [kDa]	Modifications	emPAI
A0A075B6H6	Ig kappa chain C region (Fragment) OS=Homo sapiens GN=IGKC PE=1 SV=1	88.785	8	107	11.7	Phospho [T2; S7; S14; S20; T22]	63094.7
V9HVY1	Epididymis secretory sperm binding protein Li 78p OS=Homo sapiens GN=HEL-S-78p PE=2 SV=1	76.9857	47	491	55.9		1653.82
A5YAK2	Apolipoprotein C-IV OS=Homo sapiens GN=APOC4 PE=2 SV=1	58.2677	2	127	14.6		371.759
K7ER74	Protein APOC4-APOC2 OS=Homo sapiens GN=APOC4-APOC2 PE=1 SV=1	39.8876	8	178	20	Phospho [S155; T156]	315.228
Q8TCZ8	Apolipoprotein E (Fragment) OS=Homo sapiens GN=APOE PE=4 SV=1	66.6667	2	57	6.7	Phospho [S27]	176.828
P02679	Fibrinogen gamma chain OS=Homo sapiens GN=FGG PE=1 SV=3	71.0817	35	453	51.5	Phospho [Y448]	160.026
B0YIW2	Apolipoprotein C-III OS=Homo sapiens GN=APOC3 PE=1 SV=1	68.3761	10	117	12.8		132.352
P02671	Fibrinogen alpha chain OS=Homo sapiens GN=FGA PE=1 SV=2	51.6166	53	866	94.9	Phospho [T468; T479; T484; S485; S489; T499; S524; T528; S534; S546; S549]	127.439
A0A024R0T8	Apolipoprotein C-I, isoform CRA_a OS=Homo sapiens GN=APOC1 PE=4 SV=1	39.759	5	83	9.3		99
P02649	Apolipoprotein E OS=Homo sapiens GN=APOE PE=1 SV=1	74.1325	26	317	36.1	Phospho [S147]	90.201
A0A024R3E3	Apolipoprotein A-I, isoform CRA_a OS=Homo sapiens GN=APOA1 PE=3 SV=1	67.0412	30	267	30.8		79.309
A0A0K2BMD8	Mutant hemoglobin alpha 2 globin chain OS=Homo sapiens GN=HBA2 PE=3 SV=1	83.8028	8	142	15.2		73.989
Q6PIL8	IGK@ protein OS=Homo sapiens GN=IGK@ PE=1 SV=1	63.1356	2	236	25.8		67.129
P00738	Haptoglobin OS=Homo sapiens GN=HP PE=1 SV=1	59.8522	14	406	45.2		66.002
D9YZU5	Beta-globin OS=Homo sapiens GN=HBB PE=3 SV=1	89.7959	7	147	16		64.793
P04003	C4b-binding protein alpha chain OS=Homo sapiens GN=C4BPA PE=1 SV=2	63.3166	37	597	67		60.585
V9GYM3	Apolipoprotein A-II OS=Homo sapiens GN=APOA2 PE=1 SV=1	51.8797	8	133	14.9		55.234
B2R5G8	Serum amyloid A protein OS=Homo sapiens PE=2 SV=1	56.1538	5	130	14.8		30.623
P01023	Alpha-2-macroglobulin OS=Homo sapiens GN=A2M PE=1 SV=3	65.8073	69	1474	163.2		29.747
C0JYY2	Apolipoprotein B (Including Ag(X) antigen) OS=Homo sapiens GN=APOB PE=4 SV=1	62.963	273	4563	515.2	Phospho [T3854; T3861; S3866]	29.432
P00739	Haptoglobin-related protein OS=Homo sapiens GN=HPR PE=2 SV=2	56.8966	8	348	39		23.621
P02768	Serum albumin OS=Homo sapiens GN=ALB PE=1 SV=2	57.3071	34	609	69.3		20.544
S6B294	IgG L chain OS=Homo sapiens PE=2 SV=1	40.5405	2	185	20.1		15.681
A2KBC7	Anti-IFN-G scFv (Fragment) OS=Homo sapiens PE=2 SV=1	69.7479	3	238	25		13.678
A2NUT2	Lambda-chain (AA -20 to 215) OS=Homo sapiens PE=1 SV=1	56.1702	3	235	24.6		13.251
L8E853	von Willebrand factor OS=Homo sapiens GN=VWF PE=4 SV=1	43.9411	2	2715	298.2		12.386
P04275	von Willebrand factor OS=Homo sapiens GN=VWF PE=1 SV=4	43.8322	5	2813	309.1		12.088
A0A0S2Z4L3	Protein S isoform 2 (Fragment) OS=Homo sapiens GN=PROS1 PE=2 SV=1	45.339	28	708	78.8		11.389
A5PL32	APOL1 protein (Fragment) OS=Homo sapiens GN=APOL1 PE=2 SV=1	48.2916	14	439	48.5	Phospho [S352; S355]	9
A0A0B4J1U7	Immunoglobulin heavy variable 6-1 OS=Homo sapiens GN=IGHV6-1 PE=3 SV=1	33.8843	3	121	13.5		9
Q9UL81	Myosin-reactive immunoglobulin light chain variable region (Fragment) OS=Homo sapiens PE=2 SV=1	57.0093	2	107	11.5		9
P01699	Immunoglobulin lambda variable 1-44 OS=Homo sapiens GN=IGLV1-44 PE=1 SV=2	38.4615	2	117	12.2		9
O95445	Apolipoprotein M OS=Homo sapiens GN=APOM PE=1 SV=2	62.766	8	188	21.2		7.377
S6BGD6	IgG L chain OS=Homo sapiens PE=1 SV=1	45.9574	2	235	24.8		7.377
Q6GMW6	Uncharacterized protein OS=Homo sapiens PE=2 SV=1	36.1702	3	235	24.8		7.254
O43866	CD5 antigen-like OS=Homo sapiens GN=CD5L PE=1 SV=1	51.0086	13	347	38.1		7.185
P01591	Immunoglobulin J chain OS=Homo sapiens GN=JCHAIN PE=1 SV=4	51.5723	7	159	18.1		6.943
A0A0X9UWL5	GCT-A5 light chain variable region (Fragment) OS=Homo sapiens PE=2 SV=1	46.9027	4	113	12.5		6.499
P27169	Serum paraoxonase/arylesterase 1 OS=Homo sapiens GN=PON1 PE=1 SV=3	48.169	12	355	39.7		6.079
P02746	Complement C1q subcomponent subunit B OS=Homo sapiens GN=C1QB PE=1 SV=3	33.9921	7	253	26.7		6.017
C9JF17	Apolipoprotein D (Fragment) OS=Homo sapiens GN=APOD PE=1 SV=1	36.2791	9	215	24.1		5.813
A0A0B4J1Y9	Immunoglobulin heavy variable 3-72 OS=Homo sapiens GN=IGHV3-72 PE=3 SV=1	48.7395	4	119	13.2		5.813
A0A125U0V2	GCT-A1 heavy chain variable region (Fragment) OS=Homo sapiens PE=2 SV=1	26.7717	2	127	13.7		5.813
A0N5G1	Rheumatoid factor C6 light chain (Fragment) OS=Homo sapiens GN=V<kappa>1 PE=2 SV=1	36.2069	2	116	12.5		5.813
A2MYE1	A30 (Fragment) OS=Homo sapiens PE=4 SV=1	41.6667	2	96	10.4		5.813
Q96K68	cDNA FLJ14473 fis, clone MAMMA1001080, highly similar to Homo sapiens SNC73 protein (SNC73) mRNA OS=Homo sapiens PE=2 SV=1	44.7368	5	494	53.1		5.31
P02776	Platelet factor 4 OS=Homo sapiens GN=PF4 PE=1 SV=2	35.6436	3	101	10.8		5.31
P13645	Keratin, type I cytoskeletal 10 OS=Homo sapiens GN=KRT10 PE=1 SV=6	40.2397	15	584	58.8		4.623
P06727	Apolipoprotein A-IV OS=Homo sapiens GN=APOA4 PE=1 SV=3	40.404	14	396	45.4		4.623
Q6MZX9	Putative uncharacterized protein DKFZp686M08189 OS=Homo sapiens GN=DKFZp686M08189 PE=2 SV=1	37.6812	2	483	52.2		4.484
P02747	Complement C1q subcomponent subunit C OS=Homo sapiens GN=C1QC PE=1 SV=3	37.1429	8	245	25.8		4.179
P02775	Platelet basic protein OS=Homo sapiens GN=PPBP PE=1 SV=3	25	3	128	13.9		4.179
A0A193CHR0	10E8 heavy chain variable region (Fragment) OS=Homo sapiens PE=2 SV=1	25.9542	2	131	14.4		4.179
A0A0S2Z3Y1	Lectin galactoside-binding soluble 3 binding protein isoform 1 (Fragment) OS=Homo sapiens GN=LGALS3BP PE=2 SV=1	41.5385	17	585	65.3		3.977
O75636	Ficolin-3 OS=Homo sapiens GN=FCN3 PE=1 SV=2	48.1605	10	299	32.9		3.833
A0A024R462	Fibronectin 1, isoform CRA_n OS=Homo sapiens GN=FN1 PE=4 SV=1	37.7495	52	2355	259	Phospho [S2353]	3.806
A0A075B6S5	Immunoglobulin kappa variable 1-27 OS=Homo sapiens GN=IGKV1-27 PE=3 SV=1	58.9744	3	117	12.7		3.642
A0A075B6H9	Immunoglobulin lambda variable 4-69 OS=Homo sapiens GN=IGLV4-69 PE=1 SV=1	36.1345	3	119	12.8		3.642
Q53GK6	Beta actin variant (Fragment) OS=Homo sapiens PE=2 SV=1	50.9333	6	375	41.7		3.489
P20851	C4b-binding protein beta chain OS=Homo sapiens GN=C4BPB PE=1 SV=1	35.7143	6	252	28.3		3.217
A0A120HG46	GCT-A10 heavy chain variable region (Fragment) OS=Homo sapiens PE=2 SV=1	31.4961	3	127	13.6		3.217
P0DJI8	Serum amyloid A-1 protein OS=Homo sapiens GN=SAA1 PE=1 SV=1	54.918	3	122	13.5		3.217
P06310	Immunoglobulin kappa variable 2-30 OS=Homo sapiens GN=IGKV2-30 PE=3 SV=2	38.3333	2	120	13.2		2.981
P35527	Keratin, type I cytoskeletal 9 OS=Homo sapiens GN=KRT9 PE=1 SV=3	43.0177	14	623	62		2.875
H6VRG1	Keratin 1 OS=Homo sapiens GN=KRT1 PE=3 SV=1	46.2016	17	645	66.1		2.793
B4DPQ0	Complement C1r subcomponent OS=Homo sapiens GN=C1R PE=1 SV=1	34.2142	16	719	81.8		2.529
Q59EP2	Angiotensinogen variant (Fragment) OS=Homo sapiens PE=2 SV=1	31.9756	9	491	53.7		2.511
Q9Y6R7	IgGFc-binding protein OS=Homo sapiens GN=FCGBP PE=1 SV=3	35.3006	73	5405	571.6		2.348
P10909-2	Isoform 2 of Clusterin OS=Homo sapiens GN=CLU	27.3453	12	501	57.8		2.3
A2MYD4	V2-7 protein (Fragment) OS=Homo sapiens GN=V2-7 PE=4 SV=1	42.7083	3	96	10.3		2.162
P04433	Immunoglobulin kappa variable 3-11 OS=Homo sapiens GN=IGKV3-11 PE=1 SV=1	44.3478	2	115	12.6		2.162
P04430	Immunoglobulin kappa variable 1-16 OS=Homo sapiens GN=IGKV1-16 PE=1 SV=2	34.188	2	117	12.6		2.162
A0N7J6	REV25-2 (Fragment) OS=Homo sapiens PE=2 SV=1	22.3881	2	134	14.5		2.162
P01703	Immunoglobulin lambda variable 1-40 OS=Homo sapiens GN=IGLV1-40 PE=1 SV=2	38.9831	2	118	12.3		2.162
Q6GMX6	IGH@ protein OS=Homo sapiens GN=IGH@ PE=1 SV=1	23.0108	3	465	51.1		2.008
P02745	Complement C1q subcomponent subunit A OS=Homo sapiens GN=C1QA PE=1 SV=2	28.9796	5	245	26		1.929
V9HW68	Epididymis luminal protein 214 OS=Homo sapiens GN=HEL-214 PE=2 SV=1	20.4255	2	470	51.7		1.873
Q9UHG3	Prenylcysteine oxidase 1 OS=Homo sapiens GN=PCYOX1 PE=1 SV=3	33.2673	11	505	56.6		1.807
A0A0X9T7T4	MS-D3 heavy chain variable region (Fragment) OS=Homo sapiens PE=2 SV=1	30.597	2	134	15		1.783
P08519	Apolipoprotein(a) OS=Homo sapiens GN=LPA PE=1 SV=1	49.0765	49	4548	501		1.759
A0A109PVK5	GCT-A6 heavy chain variable region (Fragment) OS=Homo sapiens PE=2 SV=1	28.1481	2	135	15		1.683
P68363	Tubulin alpha-1B chain OS=Homo sapiens GN=TUBA1B PE=1 SV=1	26.8293	3	451	50.1	Phospho [S232]	1.61
P11226	Mannose-binding protein C OS=Homo sapiens GN=MBL2 PE=1 SV=2	33.0645	5	248	26.1		1.512
A0A075B6R9	Protein IGKV2D-24 (Fragment) OS=Homo sapiens GN=IGKV2D-24 PE=4 SV=1	32.5	2	120	13.1		1.512
P23083	Immunoglobulin heavy variable 1-2 OS=Homo sapiens GN=IGHV1-2 PE=1 SV=2	43.5897	3	117	13.1		1.371
Q6N091	Putative uncharacterized protein DKFZp686C02220 (Fragment) OS=Homo sapiens GN=DKFZp686C02220 PE=2 SV=1	21.4	2	500	54.1		1.371
A0A125U0U7	MS-C1 heavy chain variable region (Fragment) OS=Homo sapiens PE=2 SV=1	22.8814	2	118	13.1		1.371
P68366	Tubulin alpha-4A chain OS=Homo sapiens GN=TUBA4A PE=1 SV=1	22.5446	2	448	49.9	Phospho [S232]	1.371
P02749	Beta-2-glycoprotein 1 OS=Homo sapiens GN=APOH PE=1 SV=3	23.7681	6	345	38.3		1.336
P19652	Alpha-1-acid glycoprotein 2 OS=Homo sapiens GN=ORM2 PE=1 SV=2	33.8308	5	201	23.6		1.276
B3KNX0	cDNA FLJ30621 fis, clone CTONG2001681, highly similar to Complement C1s subcomponent (EC 3.4.21.42) OS=Homo sapiens PE=2 SV=1	19.9128	11	688	76.6		1.254
Q9BWP8-10	Isoform 10 of Collectin-11 OS=Homo sapiens GN=COLEC11	21.0526	5	285	30.2		1.254
P35579	Myosin-9 OS=Homo sapiens GN=MYH9 PE=1 SV=4	24.898	38	1960	226.4		1.154
Q8NI99	Angiopoietin-related protein 6 OS=Homo sapiens GN=ANGPTL6 PE=1 SV=1	32.766	8	470	51.7		1.154
A0A0G2JPR0	Complement C4-A OS=Homo sapiens GN=C4A PE=1 SV=1	25.9748	2	1744	192.8		1.154
A0A075B6K5	HCG2043239 (Fragment) OS=Homo sapiens GN=IGLV3-9 PE=1 SV=1	30.4348	2	115	12.3		1.154
P0C0L5	Complement C4-B OS=Homo sapiens GN=C4B PE=1 SV=2	25.9748	2	1744	192.6		1.137
Q6MZU6	Putative uncharacterized protein DKFZp686C15213 OS=Homo sapiens GN=DKFZp686C15213 PE=2 SV=1	19.8276	3	464	51.1		1.081
Q13790	Apolipoprotein F OS=Homo sapiens GN=APOF PE=1 SV=2	29.4479	4	326	35.4		1.054
P14151-2	Isoform 2 of L-selectin OS=Homo sapiens GN=SELL	9.87013	4	385	43.6		1.054
P68371	Tubulin beta-4B chain OS=Homo sapiens GN=TUBB4B PE=1 SV=1	26.0674	6	445	49.8		1.015
B7Z6Z4	Myosin light polypeptide 6 OS=Homo sapiens GN=MYL6 PE=1 SV=1	20.1681	4	238	26.7		0.968
Q0ZCH6	Immunglobulin heavy chain variable region (Fragment) OS=Homo sapiens PE=4 SV=1	16.7939	2	131	14.3		0.931
B2R8I2	cDNA, FLJ93914, highly similar to Homo sapiens histidine-rich glycoprotein (HRG), mRNA OS=Homo sapiens PE=2 SV=1	14.4762	5	525	59.5		0.905
P48740-2	Isoform 2 of Mannan-binding lectin serine protease 1 OS=Homo sapiens GN=MASP1	22.2527	4	728	81.8		0.884
P08514	Integrin alpha-IIb OS=Homo sapiens GN=ITGA2B PE=1 SV=3	18.9605	12	1039	113.3		0.874
P37802-2	Isoform 2 of Transgelin-2 OS=Homo sapiens GN=TAGLN2	33.1818	4	220	24.4		0.848
Q59E93	Membrane alanine aminopeptidase variant (Fragment) OS=Homo sapiens PE=2 SV=1	23.3367	13	977	110.5		0.817
Q92954-3	Isoform C of Proteoglycan 4 OS=Homo sapiens GN=PRG4	18.6117	18	1311	141		0.778
A0A024RB87	RAP1B, member of RAS oncogene family, isoform CRA_a OS=Homo sapiens GN=RAP1B PE=4 SV=1	20.6522	3	184	20.8		0.778
P03951	Coagulation factor XI OS=Homo sapiens GN=F11 PE=1 SV=1	24	8	625	70.1		0.708
Q5EBM2	Uncharacterized protein OS=Homo sapiens PE=1 SV=1	17.5337	3	519	56.8		0.701
I3L3D5	Profilin (Fragment) OS=Homo sapiens GN=PFN1 PE=1 SV=1	16.9697	2	165	17.5		0.668
P67936-2	Isoform 2 of Tropomyosin alpha-4 chain OS=Homo sapiens GN=TPM4	21.1268	5	284	32.7		0.65
P21333	Filamin-A OS=Homo sapiens GN=FLNA PE=1 SV=4	17.227	29	2647	280.6		0.649
A1L4H1	Soluble scavenger receptor cysteine-rich domain-containing protein SSC5D OS=Homo sapiens GN=SSC5D PE=1 SV=3	15.9568	14	1573	165.6		0.638
Q9Y490	Talin-1 OS=Homo sapiens GN=TLN1 PE=1 SV=3	21.9205	30	2541	269.6		0.618
Q8WWZ8	Oncoprotein-induced transcript 3 protein OS=Homo sapiens GN=OIT3 PE=1 SV=2	17.6147	6	545	60		0.61
P02774-3	Isoform 3 of Vitamin D-binding protein OS=Homo sapiens GN=GC	15.213	5	493	55.1		0.585
Q9H4B7	Tubulin beta-1 chain OS=Homo sapiens GN=TUBB1 PE=1 SV=1	15.9645	4	451	50.3		0.585
A6NMH8	Tetraspanin OS=Homo sapiens GN=CD81 PE=1 SV=1	15.6934	2	274	29.8		0.585
J3KNB4	Cathelicidin antimicrobial peptide OS=Homo sapiens GN=CAMP PE=1 SV=1	11.5607	2	173	19.6		0.585
V9HWA9	Epididymis secretory sperm binding protein Li 62p OS=Homo sapiens GN=HEL-S-62p PE=2 SV=1	16.4762	18	1663	187		0.558
P12814-3	Isoform 3 of Alpha-actinin-1 OS=Homo sapiens GN=ACTN1	17.2867	12	914	105.5		0.551
A0A024R6I7	Alpha-1-antitrypsin OS=Homo sapiens GN=SERPINA1 PE=1 SV=1	15.5502	5	418	46.7		0.532
A0A0K0K1H8	Epididymis secretory sperm binding protein Li 71p OS=Homo sapiens GN=HEL-S-71p PE=2 SV=1	14.7564	7	698	77		0.506
D9ZGG2	Vitronectin OS=Homo sapiens GN=VTN PE=4 SV=1	8.99582	3	478	54.3		0.492
P80108	Phosphatidylinositol-glycan-specific phospholipase D OS=Homo sapiens GN=GPLD1 PE=1 SV=3	14.5238	7	840	92.3		0.468
A0A0S2Z4I5	Complement factor properdin isoform 1 (Fragment) OS=Homo sapiens GN=CFP PE=2 SV=1	13.0064	3	469	51.2		0.468
A0A068LKQ8	Ig heavy chain variable region (Fragment) OS=Homo sapiens PE=2 SV=1	26.087	2	115	12.4		0.468
P00451	Coagulation factor VIII OS=Homo sapiens GN=F8 PE=1 SV=1	12.5053	19	2351	266.8	Phospho [Y1699]	0.444
L7UUZ7	Integrin beta OS=Homo sapiens GN=ITGB3 PE=2 SV=1	7.36041	4	788	86.9		0.431
P04406	Glyceraldehyde-3-phosphate dehydrogenase OS=Homo sapiens GN=GAPDH PE=1 SV=3	12.8358	3	335	36		0.389
P35908	Keratin, type II cytoskeletal 2 epidermal OS=Homo sapiens GN=KRT2 PE=1 SV=2	12.2066	5	639	65.4		0.379
A4D1B1	CD36 antigen (Collagen type I receptor, thrombospondin receptor) OS=Homo sapiens GN=CD36 PE=2 SV=1	10.1695	3	472	53		0.369
J3KQ66	Reelin OS=Homo sapiens GN=RELN PE=1 SV=1	9.45087	20	3460	388.2		0.368
P10646	Tissue factor pathway inhibitor OS=Homo sapiens GN=TFPI PE=1 SV=1	9.53947	2	304	35		0.359
P24821	Tenascin OS=Homo sapiens GN=TNC PE=1 SV=3	11.9945	14	2201	240.7		0.347
Q86UX7	Fermitin family homolog 3 OS=Homo sapiens GN=FERMT3 PE=1 SV=1	12.5937	5	667	75.9		0.334
P22792	Carboxypeptidase N subunit 2 OS=Homo sapiens GN=CPN2 PE=1 SV=3	11.7431	3	545	60.5		0.334
B2RDY9	Adenylyl cyclase-associated protein OS=Homo sapiens PE=2 SV=1	14.1053	4	475	51.6		0.322
P12111	Collagen alpha-3(VI) chain OS=Homo sapiens GN=COL6A3 PE=1 SV=5	10.0094	21	3177	343.5		0.318
P08567	Pleckstrin OS=Homo sapiens GN=PLEK PE=1 SV=3	11.1429	2	350	40.1		0.311
O00187	Mannan-binding lectin serine protease 2 OS=Homo sapiens GN=MASP2 PE=1 SV=4	8.60058	4	686	75.7		0.301
Q15485	Ficolin-2 OS=Homo sapiens GN=FCN2 PE=1 SV=2	11.8211	2	313	34		0.292
E7EX29	14-3-3 protein zeta/delta (Fragment) OS=Homo sapiens GN=YWHAZ PE=1 SV=1	16.6667	2	246	28		0.274
P01833	Polymeric immunoglobulin receptor OS=Homo sapiens GN=PIGR PE=1 SV=4	9.03141	4	764	83.2		0.259
P06396	Gelsolin OS=Homo sapiens GN=GSN PE=1 SV=1	10.4859	4	782	85.6		0.252
A0A024R9Q1	Thrombospondin 1, isoform CRA_a OS=Homo sapiens GN=THBS1 PE=4 SV=1	7.77778	7	1170	129.3		0.251
P18428	Lipopolysaccharide-binding protein OS=Homo sapiens GN=LBP PE=1 SV=3	6.23701	2	481	53.4		0.245
H0YMD1	Low-density lipoprotein receptor OS=Homo sapiens GN=LDLR PE=1 SV=1	6.22363	4	948	104.7		0.238
B7Z8Q2	cDNA FLJ55606, highly similar to Alpha-2-HS-glycoprotein OS=Homo sapiens PE=2 SV=1	11.5473	2	433	46.6		0.233
A0A024RAI1	ARP3 actin-related protein 3 homolog (Yeast), isoform CRA_a OS=Homo sapiens GN=ACTR3 PE=3 SV=1	11.4833	2	418	47.3		0.222
P02533	Keratin, type I cytoskeletal 14 OS=Homo sapiens GN=KRT14 PE=1 SV=4	8.68644	2	472	51.5		0.218
P12109	Collagen alpha-1(VI) chain OS=Homo sapiens GN=COL6A1 PE=1 SV=3	7.19844	5	1028	108.5		0.208
A0A0A0MSD0	Sushi, von Willebrand factor type A, EGF and pentraxin domain-containing protein 1 OS=Homo sapiens GN=SVEP1 PE=1 SV=1	5.73587	14	3574	390.2		0.202
B3KS79	cDNA FLJ35730 fis, clone TESTI2003131, highly similar to ALPHA-1-ANTICHYMOTRYPSIN OS=Homo sapiens PE=2 SV=1	4.46429	2	448	50.6		0.202
Q08431	Lactadherin OS=Homo sapiens GN=MFGE8 PE=1 SV=2	6.45995	2	387	43.1		0.202
Q8WW52	Protein FAM151A OS=Homo sapiens GN=FAM151A PE=2 SV=2	4.2735	2	585	64		0.202
P00488	Coagulation factor XIII A chain OS=Homo sapiens GN=F13A1 PE=1 SV=4	6.14754	3	732	83.2		0.184
V9HWK2	Epididymis luminal protein 114 OS=Homo sapiens GN=HEL114 PE=2 SV=1	7.31922	5	1134	123.7		0.179
P05362	Intercellular adhesion molecule 1 OS=Homo sapiens GN=ICAM1 PE=1 SV=2	5.6391	2	532	57.8		0.166
P23141-2	Isoform 2 of Liver carboxylesterase 1 OS=Homo sapiens GN=CES1	6.8662	2	568	62.6		0.15
P19827	Inter-alpha-trypsin inhibitor heavy chain H1 OS=Homo sapiens GN=ITIH1 PE=1 SV=3	2.5247	2	911	101.3		0.125
A0A0A0MRJ7	Coagulation factor V OS=Homo sapiens GN=F5 PE=1 SV=1	2.28802	5	2229	252.1		0.122
E2RVJ0	Anion exchange protein OS=Homo sapiens GN=SLC4A1 PE=2 SV=1	4.05702	2	912	101.9		0.122
A0A024R8S5	Protein disulfide-isomerase OS=Homo sapiens GN=P4HB PE=2 SV=1	3.54331	2	508	57.1		0.122
A0A024R962	HCG40889, isoform CRA_b OS=Homo sapiens GN=hCG_40889 PE=4 SV=1	2.43704	2	1231	139		0.105
A8K6Q8	cDNA FLJ75881, highly similar to Homo sapiens transferrin receptor (p90, CD71) (TFRC), mRNA OS=Homo sapiens PE=2 SV=1	2.5	2	760	84.8		0.094
J7M2B1	Tyrosine-protein kinase receptor OS=Homo sapiens GN=EZR-ROS1 PE=2 SV=1	1.8648	2	858	98.9		0.093
P12110	Collagen alpha-2(VI) chain OS=Homo sapiens GN=COL6A2 PE=1 SV=4	2.45339	2	1019	108.5		0.077
P39060	Collagen alpha-1(XVIII) chain OS=Homo sapiens GN=COL18A1 PE=1 SV=5	2.56556	2	1754	178.1		0.062
Q13201	Multimerin-1 OS=Homo sapiens GN=MMRN1 PE=1 SV=3	2.76873	2	1228	138		0.056
Q96RW7	Hemicentin-1 OS=Homo sapiens GN=HMCN1 PE=1 SV=2	0.567879	2	5635	613		0.015
A0A087WYJ9	Ig mu chain C region OS=Homo sapiens GN=IGHM PE=1 SV=2	83.1858	1	452	49.4	Phospho [S186; S192; T195; T204; S210; S211]	258.294
Q86TT1	Full-length cDNA clone CS0DD006YL02 of Neuroblastoma of Homo sapiens (human) OS=Homo sapiens PE=2 SV=1	75.7333	1	375	41.2		250.189
P55056	Apolipoprotein C-IV OS=Homo sapiens GN=APOC4 PE=1 SV=1	58.2677	1	127	14.5		176.828
P01871	Ig mu chain C region OS=Homo sapiens GN=IGHM PE=1 SV=3	73.6726	1	452	49.3	Phospho [S187; S193; T196; T205; S211; S212]	160.026
P04220	Ig mu heavy chain disease protein OS=Homo sapiens PE=1 SV=1	60.6138	1	391	43		62.096
A0A075B6K9	Ig lambda-2 chain C regions (Fragment) OS=Homo sapiens GN=IGLC2 PE=4 SV=1	78.3019	1	106	11.3	Phospho [S8; T10; S15; S16; T25]	50.795
Q96SA9	Anti-streptococcal/anti-myosin immunoglobulin kappa light chain variable region (Fragment) OS=Homo sapiens PE=2 SV=1	54.2056	1	107	11.5		9
Q9UL78	Myosin-reactive immunoglobulin light chain variable region (Fragment) OS=Homo sapiens PE=2 SV=1	66.055	1	109	11.6		9
A0A5E4	Uncharacterized protein OS=Homo sapiens PE=2 SV=1	37.4468	1	235	24.7		7.254
A0M8Q6	Ig lambda-7 chain C region OS=Homo sapiens GN=IGLC7 PE=4 SV=2	50.9434	1	106	11.3		6.197
P01619	Immunoglobulin kappa variable 3-20 OS=Homo sapiens GN=IGKV3-20 PE=1 SV=2	78.4483	1	116	12.5	Phospho [T3; T18; T19]	6.197
A2NWW1	VH-3 family (VH26)D/J protein (Fragment) OS=Homo sapiens GN=VH-3 family (VH26)D/J PE=4 SV=1	42.4779	1	113	12.3		5.813
A0N071	Delta globin OS=Homo sapiens GN=HBD PE=3 SV=1	42.1769	1	147	16		5.579
Q9UL90	Myosin-reactive immunoglobulin heavy chain variable region (Fragment) OS=Homo sapiens PE=2 SV=1	47.7876	1	113	12.4		4.623
A0A0J9YVT0	Immunoglobulin heavy variable 3-33 (Fragment) OS=Homo sapiens GN=IGHV3-33 PE=4 SV=1	38.4615	1	117	13		4.179
Q9UL83	Myosin-reactive immunoglobulin light chain variable region (Fragment) OS=Homo sapiens PE=2 SV=1	36.1111	1	108	11.8		3.642
A2NB45	Cold agglutinin FS-1 L-chain (Fragment) OS=Homo sapiens PE=2 SV=1	38.9381	1	113	12.4		3.642
Q9HCC1	Single chain Fv (Fragment) OS=Homo sapiens PE=1 SV=1	36.6071	1	112	12.2		3.642
A0A087WSX0	Immunoglobulin lambda variable 5-45 OS=Homo sapiens GN=IGLV5-45 PE=3 SV=1	13.8211	1	123	13.2		3.642
A0A109PSY4	MS-A1 light chain variable region (Fragment) OS=Homo sapiens PE=2 SV=1	37.7358	1	106	11.4		2.981
A0A087WW87	Immunoglobulin kappa variable 2-40 OS=Homo sapiens GN=IGKV2-40 PE=3 SV=2	52.8926	1	121	13.3	Phospho [S18; S19]	2.981
A2NXP9	K light chain variable region (Fragment) OS=Homo sapiens PE=2 SV=1	49.0909	1	110	12		2.728
A0A0C4DH38	Immunoglobulin heavy variable 5-51 OS=Homo sapiens GN=IGHV5-51 PE=3 SV=1	47.0085	1	117	12.7		2.728
A0A0B4J1X5	Immunoglobulin heavy variable 3-74 OS=Homo sapiens GN=IGHV3-74 PE=3 SV=1	35.0427	1	117	12.8		2.728
Q0ZCJ1	Immunglobulin heavy chain variable region (Fragment) OS=Homo sapiens PE=4 SV=1	21.4876	1	121	13.4		2.728
A0A096LPE2	Protein SAA2-SAA4 OS=Homo sapiens GN=SAA2-SAA4 PE=4 SV=1	25	1	208	23.3		2.162
A0A125QYY5	GCT-A9 light chain variable region (Fragment) OS=Homo sapiens PE=2 SV=1	31.7757	1	107	11.6		2.162
A2IPI6	HRV Fab 027-VL (Fragment) OS=Homo sapiens PE=2 SV=1	29.2035	1	113	12.4		2.162
P01624	Immunoglobulin kappa variable 3-15 OS=Homo sapiens GN=IGKV3-15 PE=1 SV=2	26.087	0	115	12.5		2.162
Q65ZC9	Single-chain Fv (Fragment) OS=Homo sapiens GN=scFv PE=2 SV=1	17.9167	1	240	25.6		1.894
A0A075B6N7	Ig alpha-2 chain C region (Fragment) OS=Homo sapiens GN=IGHA2 PE=1 SV=1	35.8824	1	340	36.6		1.783
A0A125U0V1	MS-F1 heavy chain variable region (Fragment) OS=Homo sapiens PE=2 SV=1	26.9841	1	126	13.5		1.783
A0A0X9T7V9	GCT-A4 light chain variable region (Fragment) OS=Homo sapiens PE=2 SV=1	39.4495	1	109	11.8		1.683
A0A0X9TD47	MS-D1 light chain variable region (Fragment) OS=Homo sapiens PE=2 SV=1	27.1028	1	107	11.6		1.683
A0A0F7TAV4	IGHV5-51 protein (Fragment) OS=Homo sapiens GN=IGHV5-51 PE=4 SV=1	35.4545	1	110	12.1		1.683
Q9UL71	Myosin-reactive immunoglobulin heavy chain variable region (Fragment) OS=Homo sapiens PE=2 SV=1	33.8843	0	121	13.1		1.683
Q6N089	Uncharacterized protein OS=Homo sapiens GN=DKFZp686P15220 PE=1 SV=1	21.1864	1	472	51.7		1.565
A2J1M5	Rheumatoid factor RF-IP4 (Fragment) OS=Homo sapiens PE=2 SV=1	27.6596	1	94	10.3		1.512
P01766	Immunoglobulin heavy variable 3-13 OS=Homo sapiens GN=IGHV3-13 PE=1 SV=2	18.9655	1	116	12.5		1.512
A0A075B7D4	Protein IGKV1OR2-108 (Fragment) OS=Homo sapiens GN=IGKV1OR2-108 PE=1 SV=1	21.3675	1	117	12.5		1.512
A8K3K1	cDNA FLJ78096, highly similar to Homo sapiens actin, alpha, cardiac muscle (ACTC), mRNA OS=Homo sapiens PE=2 SV=1	16.4456	1	377	42		1.462
Q6MZQ6	Putative uncharacterized protein DKFZp686G11190 OS=Homo sapiens GN=DKFZp686G11190 PE=2 SV=1	17.0526	1	475	52		1.154
A2J1N5	Rheumatoid factor RF-ET6 (Fragment) OS=Homo sapiens PE=2 SV=1	23.4043	1	94	10.4		1.154
A0A0B4J2D9	Immunoglobulin kappa variable 1D-13 OS=Homo sapiens GN=IGKV1D-13 PE=3 SV=1	18.8034	1	117	12.6		1.154
P01601	Immunoglobulin kappa variable 1D-16 (Fragment) OS=Homo sapiens GN=IGKV1D-16 PE=3 SV=2	18.8034	1	117	12.7		1.154
P01709	Immunoglobulin lambda variable 2-8 OS=Homo sapiens GN=IGLV2-8 PE=1 SV=2	6.77966	1	118	12.4		1.154
A2N0T5	VH6DJ protein (Fragment) OS=Homo sapiens GN=VH6DJ PE=2 SV=1	25.2174	1	115	12.8	Phospho [S75; S80; T82]	1.154
A8K008	Uncharacterized protein OS=Homo sapiens PE=2 SV=1	15.678	1	472	51.6		1.081
A2NKM7	NANUC-2 heavy chain (Fragment) OS=Homo sapiens PE=2 SV=1	24.812	1	133	14.6		0.995
A0A109PW50	IBM-B3 heavy chain variable region (Fragment) OS=Homo sapiens PE=2 SV=1	22.5806	1	124	13.8		0.931
A0A075B6H7	Protein IGKV3-7 (Fragment) OS=Homo sapiens GN=IGKV3-7 PE=1 SV=1	23.2759	1	116	12.8		0.931
A0A068LL60	Ig heavy chain variable region (Fragment) OS=Homo sapiens PE=2 SV=1	19.1667	0	120	13.3		0.931
D3DNU8	Kininogen 1, isoform CRA_a OS=Homo sapiens GN=KNG1 PE=4 SV=1	23.4192	1	427	47.8		0.887
E5BBI6	MHC class I antigen (Fragment) OS=Homo sapiens GN=HLA-A PE=3 SV=1	24.1758	1	273	31.6		0.833
M4QNU4	MHC class I antigen (Fragment) OS=Homo sapiens GN=HLA-A PE=3 SV=1	24.1758	1	273	31.6		0.833
Q0ZCF6	Immunglobulin heavy chain variable region (Fragment) OS=Homo sapiens PE=4 SV=1	17.8295	1	129	14.5		0.778
Q9UL92	Myosin-reactive immunoglobulin heavy chain variable region (Fragment) OS=Homo sapiens PE=2 SV=1	20.9677	1	124	13.6		0.778
B4E1C2	Kininogen 1, isoform CRA_b OS=Homo sapiens GN=KNG1 PE=2 SV=1	16.6149	1	644	71.9		0.701
A0A0X9V9C4	GCT-A8 heavy chain variable region (Fragment) OS=Homo sapiens PE=2 SV=1	19.1667	1	120	13.2		0.668
P01718	Immunoglobulin lambda variable 3-27 OS=Homo sapiens GN=IGLV3-27 PE=1 SV=2	14.1593	1	113	12.2		0.585
Q8TBD0	Uncharacterized protein (Fragment) OS=Homo sapiens PE=2 SV=1	12.8788	1	132	14		0.585
P48740	Mannan-binding lectin serine protease 1 OS=Homo sapiens GN=MASP1 PE=1 SV=3	13.4478	1	699	79.2		0.52
A0A0X9V9A2	MS-C3 heavy chain variable region (Fragment) OS=Homo sapiens PE=2 SV=1	11.811	1	127	14.1		0.468
B1N7B9	Cryocrystalglobulin CC2 lambda light chain variable region (Fragment) OS=Homo sapiens PE=2 SV=1	12.7273	1	110	11.3		0.468
A0A0C4DH36	Protein IGHV3-38 (Fragment) OS=Homo sapiens GN=IGHV3-38 PE=1 SV=1	9.48276	1	116	12.8		0.468
A0A0J9YX35	Uncharacterized protein (Fragment) OS=Homo sapiens PE=1 SV=1	9.40171	1	117	12.8		0.468
Q0P5N8	TMSB4X protein (Fragment) OS=Homo sapiens GN=TMSB4X PE=2 SV=1	27.1429	1	70	7.8		0.468
A0A024F8H3	MHC class I antigen OS=Homo sapiens GN=HLA-B PE=3 SV=1	10.4972	1	362	40.4		0.413
A0A0X9TD88	GCT-A3 heavy chain variable region (Fragment) OS=Homo sapiens PE=2 SV=1	12.5984	1	127	13.8		0.389
A0A0C4DH35	Protein IGHV3-35 (Fragment) OS=Homo sapiens GN=IGHV3-35 PE=1 SV=1	9.40171	1	117	12.8		0.389
A0A0X9SZU9	MS-B1 heavy chain variable region (Fragment) OS=Homo sapiens PE=2 SV=1	10.9375	1	128	14.2		0.389
A2NH53	Immunogobulin kappa, VJ region (Fragment) OS=Homo sapiens PE=4 SV=1	18.75	1	112	12.2		0.389
A0A125U0V4	GCT-A2 heavy chain variable region (Fragment) OS=Homo sapiens PE=2 SV=1	15.0794	1	126	13.8		0.389
A2J1M8	Rheumatoid factor RF-IP12 (Fragment) OS=Homo sapiens PE=2 SV=1	13.6842	1	95	10.7		0.389
A0A068LKQ2	Ig heavy chain variable region (Fragment) OS=Homo sapiens PE=2 SV=1	13.3333	1	120	13.2		0.334
S6AWF0	IgG H chain OS=Homo sapiens PE=2 SV=1	7.94979	1	239	25.5		0.334
P14770	Platelet glycoprotein IX OS=Homo sapiens GN=GP9 PE=1 SV=3	7.34463	1	177	19		0.334
A6XMH4	Beta-2-microglobulin OS=Homo sapiens PE=2 SV=1	17.7419	1	124	14.4		0.334
S6BGD4	IgG H chain OS=Homo sapiens PE=2 SV=1	5.98291	1	234	25		0.292
A2NYU7	Heavy chain Fab (Fragment) OS=Homo sapiens PE=2 SV=1	7.08661	1	127	14		0.292
A0A087WT59	Transthyretin OS=Homo sapiens GN=TTR PE=1 SV=1	7.02703	1	185	20.1		0.259
S6C4S4	IgG H chain OS=Homo sapiens PE=2 SV=1	4.60251	1	239	25.3		0.259
J3KQ42	Tetraspanin OS=Homo sapiens GN=TSPAN4 PE=1 SV=1	9.72763	1	257	28		0.259
S6B2B6	IgG H chain OS=Homo sapiens PE=2 SV=1	3.27273	1	275	29.3		0.233
A0A126GWJ9	Olfactory receptor OS=Homo sapiens GN=OR2M2 PE=3 SV=1	10.3746	1	347	39.1	Phospho [T240; S242; S243; Y251; Y252; Y259; T263; S264]	0.233
J3QRS3	Myosin regulatory light chain 12A OS=Homo sapiens GN=MYL12A PE=1 SV=1	6.21469	1	177	20.4		0.212
Q6PEY0	Gap junction beta-7 protein OS=Homo sapiens GN=GJB7 PE=2 SV=1	11.2108	1	223	25.8	Phospho [T132; Y143; Y146; S150]	0.194
Q9UF02	Voltage-dependent calcium channel gamma-5 subunit OS=Homo sapiens GN=CACNG5 PE=2 SV=2	12.3636	1	275	30.9	Phospho [S242; S244; S247; S248; S251; S256; Y258; Y267; S271; S272; S273]	0.194
F5H423	Uncharacterized protein OS=Homo sapiens PE=3 SV=1	8.57143	1	210	23.3		0.194
O00194	Ras-related protein Rab-27B OS=Homo sapiens GN=RAB27B PE=1 SV=4	5.04587	1	218	24.6		0.179
E9PK25	Cofilin-1 OS=Homo sapiens GN=CFL1 PE=1 SV=1	13.7255	1	204	22.7		0.179
A0A024RBB7	Nucleosome assembly protein 1-like 1, isoform CRA_a OS=Homo sapiens GN=NAP1L1 PE=3 SV=1	2.8133	1	391	45.3		0.166
A8K486	Peptidyl-prolyl cis-trans isomerase OS=Homo sapiens PE=2 SV=1	7.27273	1	165	18		0.166
P61026	Ras-related protein Rab-10 OS=Homo sapiens GN=RAB10 PE=1 SV=1	5.5	1	200	22.5		0.145
A0A024R9J3	Collectin sub-family member 10 (C-type lectin), isoform CRA_a OS=Homo sapiens GN=COLEC10 PE=4 SV=1	3.61011	1	277	30.7		0.145
Q9UKR3	Kallikrein-13 OS=Homo sapiens GN=KLK13 PE=2 SV=1	3.61011	1	277	30.6		0.145
P08779	Keratin, type I cytoskeletal 16 OS=Homo sapiens GN=KRT16 PE=1 SV=4	5.70825	1	473	51.2		0.141
Q5U0I6	H.sapiens ras-related Hrab1A protein OS=Homo sapiens GN=RAB1A PE=2 SV=1	7.80488	1	205	22.7		0.136
P27105	Erythrocyte band 7 integral membrane protein OS=Homo sapiens GN=STOM PE=1 SV=3	4.16667	1	288	31.7		0.136
P02760	Protein AMBP OS=Homo sapiens GN=AMBP PE=1 SV=1	4.82955	1	352	39		0.136
Q9HBI1-2	Isoform 2 of Beta-parvin OS=Homo sapiens GN=PARVB	3.52645	1	397	45.2		0.129
P60174	Triosephosphate isomerase OS=Homo sapiens GN=TPI1 PE=1 SV=3	4.54545	1	286	30.8		0.129
G9K388	YWHAE/FAM22A fusion protein (Fragment) OS=Homo sapiens GN=YWHAE/FAM22A fusion PE=2 SV=1	3.125	1	384	41.2		0.129
A0A140VK08	Testicular secretory protein Li 8 OS=Homo sapiens PE=2 SV=1	4.05904	1	271	31.5	Phospho [S246; S249]	0.129
P05556-3	Isoform 3 of Integrin beta-1 OS=Homo sapiens GN=ITGB1	2.54545	1	825	91.6		0.122
P13224-2	Isoform 2 of Platelet glycoprotein Ib beta chain OS=Homo sapiens GN=GP1BB	2.6764	1	411	43.1		0.116
Q9NRR5	Ubiquilin-4 OS=Homo sapiens GN=UBQLN4 PE=1 SV=2	4.82529	1	601	63.8	Phospho [S197]	0.116
P49908	Selenoprotein P OS=Homo sapiens GN=SEPP1 PE=1 SV=3	5.77428	1	381	43.2		0.11
Q59ED3	Intercellular adhesion molecule 2 variant (Fragment) OS=Homo sapiens PE=2 SV=1	4.65116	1	344	38.4		0.105
A8K2W3	cDNA FLJ78516 OS=Homo sapiens PE=2 SV=1	2.11765	1	425	47.1		0.105
P08697	Alpha-2-antiplasmin OS=Homo sapiens GN=SERPINF2 PE=1 SV=3	3.46232	1	491	54.5		0.101
Q9HDC9	Adipocyte plasma membrane-associated protein OS=Homo sapiens GN=APMAP PE=1 SV=2	2.16346	1	416	46.5		0.101
P02790	Hemopexin OS=Homo sapiens GN=HPX PE=1 SV=2	1.7316	1	462	51.6		0.093
V9HW88	Calreticulin, isoform CRA_b OS=Homo sapiens GN=HEL-S-99n PE=2 SV=1	2.15827	1	417	48.1		0.093
Q59EK9	RUN domain-containing protein 3A OS=Homo sapiens GN=RUNDC3A PE=1 SV=2	1.56951	1	446	49.7		0.089
B3KUE5	Phospholipid transfer protein, isoform CRA_c OS=Homo sapiens GN=PLTP PE=2 SV=1	2.92398	1	513	56.6		0.086
P00338-3	Isoform 3 of L-lactate dehydrogenase A chain OS=Homo sapiens GN=LDHA	2.49307	1	361	39.8		0.086
P58335	Anthrax toxin receptor 2 OS=Homo sapiens GN=ANTXR2 PE=1 SV=5	1.84049	1	489	53.6		0.086
P12532-2	Isoform 2 of Creatine kinase U-type, mitochondrial OS=Homo sapiens GN=CKMT1A	1.33929	1	448	50.4		0.086
A0A024RD39	Phospholipase A2, group VII (Platelet-activating factor acetylhydrolase, plasma), isoform CRA_a OS=Homo sapiens GN=PLA2G7 PE=4 SV=1	4.7619	1	441	50		0.086
A0A0A0MTH3	Integrin-linked protein kinase OS=Homo sapiens GN=ILK PE=1 SV=1	2.07039	1	483	54.6		0.083
Q8WY91	THAP domain-containing protein 4 OS=Homo sapiens GN=THAP4 PE=1 SV=2	1.03986	1	577	62.9		0.083
E0D851	Platelet glycoprotein Ib alpha OS=Homo sapiens GN=GP1BA PE=4 SV=1	1.05263	1	665	72.8		0.083
Q9ULV4-3	Isoform 3 of Coronin-1C OS=Homo sapiens GN=CORO1C	2.46679	1	527	58.9		0.08
Q96PD5-2	Isoform 2 of N-acetylmuramoyl-L-alanine amidase OS=Homo sapiens GN=PGLYRP2	2.05047	1	634	68		0.08
A0A024R944	Serpin peptidase inhibitor, clade C (Antithrombin), member 1, isoform CRA_a OS=Homo sapiens GN=SERPINC1 PE=3 SV=1	2.37069	1	464	52.6		0.08
A0A024R035	Complement component 9, isoform CRA_a OS=Homo sapiens GN=C9 PE=4 SV=1	1.9678	1	559	63.2		0.077
A0A1B0GVH7	Protein LOC285423 OS=Homo sapiens GN=LOC285423 PE=4 SV=1	4.99002	1	501	59.5	Phospho [Y167; Y174; T179; S180]	0.077
P35858-2	Isoform 2 of Insulin-like growth factor-binding protein complex acid labile subunit OS=Homo sapiens GN=IGFALS	2.33281	1	643	70.2		0.075
P30101	Protein disulfide-isomerase A3 OS=Homo sapiens GN=PDIA3 PE=1 SV=4	2.17822	1	505	56.7		0.072
Q8IZ83	Aldehyde dehydrogenase family 16 member A1 OS=Homo sapiens GN=ALDH16A1 PE=1 SV=2	1.62095	1	802	85.1		0.072
P16070	CD44 antigen OS=Homo sapiens GN=CD44 PE=1 SV=3	1.61725	1	742	81.5		0.07
A0A024R6H1	Serine palmitoyltransferase, long chain base subunit 2, isoform CRA_a OS=Homo sapiens GN=SPTLC2 PE=3 SV=1	1.24555	1	562	62.9		0.066
B7ZLM6	X-prolyl aminopeptidase (Aminopeptidase P) 2, membrane-bound OS=Homo sapiens GN=XPNPEP2 PE=2 SV=1	3.26409	1	674	75.6		0.066
B1AHL2	Fibulin-1 OS=Homo sapiens GN=FBLN1 PE=1 SV=1	2.63523	1	721	78.3		0.062
A0A024R5Z9	Pyruvate kinase OS=Homo sapiens GN=PKM2 PE=3 SV=1	3.01318	1	531	58		0.062
Q15582	Transforming growth factor-beta-induced protein ig-h3 OS=Homo sapiens GN=TGFBI PE=1 SV=1	1.75695	1	683	74.6		0.056
P35443	Thrombospondin-4 OS=Homo sapiens GN=THBS4 PE=1 SV=2	1.76899	1	961	105.8		0.055
A0A024R1X8	Junction plakoglobin, isoform CRA_a OS=Homo sapiens GN=JUP PE=4 SV=1	2.41611	1	745	81.7		0.054
Q06033	Inter-alpha-trypsin inhibitor heavy chain H3 OS=Homo sapiens GN=ITIH3 PE=1 SV=2	2.24719	1	890	99.8		0.054
O60645	Exocyst complex component 3 OS=Homo sapiens GN=EXOC3 PE=1 SV=2	1.85185	1	756	86.8	Phospho [S74]	0.054
B7ZKY6	Membrane metallo-endopeptidase OS=Homo sapiens GN=MME PE=2 SV=1	3.06667	1	750	85.5		0.053
Q59EJ3	Heat shock 70kDa protein 1A variant (Fragment) OS=Homo sapiens PE=2 SV=1	1.55148	1	709	77.4		0.053
A0A024RDS2	Periostin, osteoblast specific factor, isoform CRA_c OS=Homo sapiens GN=POSTN PE=4 SV=1	1.67464	1	836	93.3		0.051
B7ZKJ8	ITIH4 protein OS=Homo sapiens GN=ITIH4 PE=1 SV=1	0.962567	1	935	103.8		0.047
P14625	Endoplasmin OS=Homo sapiens GN=HSP90B1 PE=1 SV=1	2.98879	1	803	92.4		0.046
A0A0A0MSY2	General transcription factor II-I repeat domain-containing protein 2A OS=Homo sapiens GN=GTF2IRD2 PE=1 SV=1	1.05374	1	949	107.1		0.044
A8K5A4	cDNA FLJ76826, highly similar to Homo sapiens ceruloplasmin (ferroxidase) (CP), mRNA OS=Homo sapiens PE=2 SV=1	1.59624	1	1065	122.1		0.043
A8K4Q9	cDNA FLJ77931 OS=Homo sapiens PE=2 SV=1	2.07197	1	917	102.4		0.041
Q15386	Ubiquitin-protein ligase E3C OS=Homo sapiens GN=UBE3C PE=1 SV=3	3.50877	1	1083	123.8	Phospho [T564; Y572; T574; S578; T582; S585]	0.037
A0A0A0MT22	Protein tyrosine phosphatase, receptor type, C, isoform CRA_d OS=Homo sapiens GN=PTPRC PE=1 SV=1	0.842266	1	1306	147.4		0.032
B3KXB6	cDNA FLJ45101 fis, clone BRAWH3032298, highly similar to Tenascin-N OS=Homo sapiens PE=2 SV=1	1.53965	1	1299	143.8		0.03
P11047	Laminin subunit gamma-1 OS=Homo sapiens GN=LAMC1 PE=1 SV=3	0.870106	1	1609	177.5		0.027
Q9NYU2	UDP-glucose:glycoprotein glucosyltransferase 1 OS=Homo sapiens GN=UGGT1 PE=1 SV=3	1.60772	1	1555	177.1		0.027
P02452	Collagen alpha-1(I) chain OS=Homo sapiens GN=COL1A1 PE=1 SV=5	0.751366	1	1464	138.9		0.026
A0A087WVQ6	Clathrin heavy chain OS=Homo sapiens GN=CLTC PE=1 SV=1	1.01251	1	1679	191.9		0.025
D3YTG3	Target of Nesh-SH3 OS=Homo sapiens GN=ABI3BP PE=1 SV=1	0.787845	1	1777	195.2		0.024
P01031	Complement C5 OS=Homo sapiens GN=C5 PE=1 SV=4	1.49165	1	1676	188.2		0.023
P23467-3	Isoform 3 of Receptor-type tyrosine-protein phosphatase beta OS=Homo sapiens GN=PTPRB	0.496614	1	2215	249		0.017
Q59FG9	Chondroitin sulfate proteoglycan 2 (Versican) variant (Fragment) OS=Homo sapiens PE=2 SV=1	0.234604	1	3410	374.1		0.015
Q59FP5	Spectrin, beta, erythrocytic (Includes spherocytosis, clinical type I) variant (Fragment) OS=Homo sapiens PE=2 SV=1	0.51458	1	2332	268.1		0.015
Q9NYQ6	Cadherin EGF LAG seven-pass G-type receptor 1 OS=Homo sapiens GN=CELSR1 PE=1 SV=1	0.530856	1	3014	329.3		0.015
O75445-3	Isoform 3 of Usherin OS=Homo sapiens GN=USH2A	0.669728	1	5226	577.9	Phospho [S2475; S2478; T2479; S2487; Y2503; T2504; Y2506]	0.01
Q07954	Prolow-density lipoprotein receptor-related protein 1 OS=Homo sapiens GN=LRP1 PE=1 SV=2	0.37412	1	4544	504.3		0.009
Q9Y6V0-5	Isoform 5 of Protein piccolo OS=Homo sapiens GN=PCLO	0.719564	1	5142	560.4	Phospho [S2575; Y2580; T2591; T2593; S2595; S2596; S2598; T2602; S2603; S2608; S2610]	0.009
A8K6I4	cDNA FLJ76877, highly similar to Homo sapiens superkiller viralicidic activity 2-like 2 (SKIV2L2), mRNA OS=Homo sapiens PE=2 SV=1	3.64683	1	1042	117.8	Phospho [S555; S561; T566; Y567; Y583]	0
Q8TF46	DIS3-like exonuclease 1 OS=Homo sapiens GN=DIS3L PE=1 SV=2	0.948767	1	1054	120.7		0
L8E8R0	Alternative protein DLG2 OS=Homo sapiens GN=DLG2 PE=4 SV=1	14.0845	1	71	8.1		0
